# Supplementary material for: Challenges in the acute identification of mild traumatic brain injuries: results from an emergency department surveillance study
Source: PubMed Central journal article supplement — BMJ Open. 2020 Feb 3;10(2):e034494. doi: 10.1136/bmjopen-2019-034494 (PMC7045153; doi:10.1136/bmjopen-2019-034494), 2020-02-03

**Table S1.** WHO criteria distribution among the identified cohort of confirmed mTBI cases

(N=351).

| <b>GCS</b><br><b>=13-14</b><br><b>(N=117)</b> | <b>LOC</b><br><b>≤ 30 mins</b><br><b>(N=185)</b> | <b>Amnesia</b><br><b>&lt; 24 hrs</b><br><b>(N=229)</b> | <b>Confusion/<br/>disorientation</b><br><b>(N=97)</b> | <b>Intracranial<br/>injuries</b><br><b>(N=31)</b> | <b>N</b><br><b>(N=351)</b> | <b>%</b> |
|-----------------------------------------------|--------------------------------------------------|--------------------------------------------------------|-------------------------------------------------------|---------------------------------------------------|----------------------------|----------|
| ✓                                             | ✓                                                | ✓                                                      | ✓                                                     | ✓                                                 | 2                          | 0.9      |
| ✓                                             | ✓                                                | ✓                                                      | ✓                                                     |                                                   | 18                         | 5.1      |
| ✓                                             | ✓                                                | ✓                                                      |                                                       | ✓                                                 | 5                          | 1.4      |
| ✓                                             | ✓                                                | ✓                                                      |                                                       |                                                   | 10                         | 2.8      |
| ✓                                             | ✓                                                |                                                        | ✓                                                     |                                                   | 6                          | 1.7      |
| ✓                                             | ✓                                                |                                                        |                                                       |                                                   | 6                          | 1.7      |
| ✓                                             |                                                  | ✓                                                      | ✓                                                     | ✓                                                 | 4                          | 1.1      |
| ✓                                             |                                                  | ✓                                                      | ✓                                                     |                                                   | 32                         | 9.1      |
| ✓                                             |                                                  | ✓                                                      |                                                       | ✓                                                 | 2                          | 0.6      |
| ✓                                             |                                                  | ✓                                                      |                                                       |                                                   | 17                         | 4.8      |
| ✓                                             |                                                  |                                                        | ✓                                                     |                                                   | 2                          | 0.6      |
| ✓                                             |                                                  |                                                        |                                                       |                                                   | 13                         | 3.7      |
|                                               | ✓                                                | ✓                                                      | ✓                                                     | ✓                                                 | 1                          | 0.3      |
|                                               | ✓                                                | ✓                                                      | ✓                                                     |                                                   | 9                          | 2.6      |
|                                               | ✓                                                | ✓                                                      |                                                       | ✓                                                 | 1                          | 0.3      |
|                                               | ✓                                                | ✓                                                      |                                                       |                                                   | 51                         | 14.4     |
|                                               | ✓                                                |                                                        | ✓                                                     | ✓                                                 | 1                          | 0.3      |
|                                               | ✓                                                |                                                        | ✓                                                     |                                                   | 4                          | 1.1      |

|   |   |   |   |    |      |
|---|---|---|---|----|------|
| ✓ |   |   | ✓ | 3  | 0.8  |
| ✓ |   |   |   | 68 | 19.4 |
|   | ✓ | ✓ | ✓ | 1  | 0.3  |
|   | ✓ | ✓ |   | 8  | 2.3  |
|   | ✓ |   | ✓ | 2  | 0.6  |
|   | ✓ |   |   | 66 | 18.7 |
|   |   | ✓ |   | 10 | 2.8  |
|   |   |   | ✓ | 9  | 2.6  |

---

WHO: World Health Organization; TBI: Traumatic brain injury; GCS: Glasgow Coma Scale;

LOC: Loss of consciousness.

**Table S2.** Confirmed mTBI patients (N=351) with documented PTA (N=260) based on the summary PTA-related mTBI designation, accounting for any documented PTA manifestations: observed/self-reported amnesia or confusion/disorientation fulfilling the WHO criteria, behavioural change or acute cognitive impairment on PTA testing.

| Summary<br>PTA-<br>related<br>mTBI<br>designatio<br>n<br>(N=260) | Observed/self<br>-reported<br>Amnesia<br>< 24 hrs<br>[WHO<br>criteria]<br>(N=229) | Observed/self<br>-reported<br>Confusion/<br>disorientatio<br>n<br>[WHO<br>criteria]<br>(N=97) | Observed<br>Behavioura<br>l changes<br>(N=61) | PTA testing<br>administere<br>d<br>(N=182) | N<br>(N=351<br>) | %        |
|------------------------------------------------------------------|-----------------------------------------------------------------------------------|-----------------------------------------------------------------------------------------------|-----------------------------------------------|--------------------------------------------|------------------|----------|
| ✓                                                                | ✓                                                                                 | ✓                                                                                             | ✓                                             | ✓                                          | 27               | 7.7      |
| ✓                                                                | ✓                                                                                 | ✓                                                                                             | ✓                                             | -                                          | 6                | 1.7      |
| ✓                                                                | ✓                                                                                 | ✓                                                                                             | -                                             | ✓                                          | 24               | 6.8      |
| ✓                                                                | ✓                                                                                 | ✓                                                                                             | -                                             | -                                          | 18               | 5.1      |
| ✓                                                                | ✓                                                                                 | -                                                                                             | ✓                                             | ✓                                          | 16               | 4.6      |
| ✓                                                                | ✓                                                                                 | -                                                                                             | ✓                                             | -                                          | 6                | 1.7      |
| ✓                                                                | ✓                                                                                 | -                                                                                             | -                                             | ✓                                          | 75               | 21.<br>4 |
| ✓                                                                | ✓                                                                                 | -                                                                                             | -                                             | -                                          | 57               | 16.<br>2 |
| ✓                                                                | -                                                                                 | ✓                                                                                             | ✓                                             | ✓                                          | 4                | 1.1      |
| ✓                                                                | -                                                                                 | ✓                                                                                             | -                                             | ✓                                          | 6                | 1.7      |
| ✓                                                                | -                                                                                 | ✓                                                                                             | -                                             | -                                          | 12               | 3.4      |

|   |   |   |   |    |                      |            |
|---|---|---|---|----|----------------------|------------|
| ✓ | - | - | ✓ | ✓  | <b>1</b>             | <b>0.3</b> |
| ✓ | - | - | ✓ |    | <b>1<sup>^</sup></b> | <b>0.3</b> |
| ✓ | - | - | - | ✓  | <b>7</b>             | <b>2</b>   |
| - | - | - | - | ✓§ | 20#                  | 5.8        |
| - | - | - | - | -  | 71#                  | 20.        |
|   |   |   |   |    |                      | 2          |

---

TBI: Traumatic brain injury; WHO: World Health Organization; PTA: Post-traumatic amnesia

Note: in **bold** are confirmed mTBI (N=9) based only on reported behavioural changes and/or cognitive impairment at PTA testing (i.e. PTA documented). All, except one (<sup>^</sup>), met other mTBI WHO criteria (i.e. LOC ≤ 30 mins, GCS=13-14, intracranial injuries).

# Confirmed mTBI (N=91) with no documented positive findings for PTA manifestations.

§ Individuals who were tested for PTA and obtained optimal scores (i.e. not in PTA), in the absence of PTA manifestations documented in other sources.

**Table S3.** Full list of ED diagnosis codes (SNOWMED codes) and ED diagnosis codes indicative of mTBI, for the overall mTBI cohort (confirmed mTBI cases, N=351; indeterminate mTBI, N=180).

| <b>SNOWMED Codes</b> | <b>Diagnosis Description</b>                          | <b>N</b> | <b>%</b> |
|----------------------|-------------------------------------------------------|----------|----------|
|                      | Injury of head (disorder)                             | 145      | 26.3     |
|                      | Motor vehicle accident victim (finding)               | 49       | 8.9      |
|                      | Minor head injury (disorder)                          | 39       | 7.1      |
|                      | Traumatic injury (disorder)                           | 37       | 6.7      |
|                      | Falls (finding)                                       | 35       | 6.4      |
|                      | Concussion (disorder)                                 | 26       | 4.7      |
|                      | Headache (finding)                                    | 11       | 2.0      |
|                      | Facial laceration (disorder)                          | 10       | 1.8      |
|                      | Victim of physical assault (finding)                  | 9        | 1.6      |
|                      | Alcohol intoxication (disorder)                       | 8        | 1.5      |
|                      | Falling injury (finding)                              | 8        | 1.5      |
|                      | Fractured nasal bones (disorder)                      | 8        | 1.5      |
|                      | Laceration of head (disorder)                         | 8        | 1.5      |
|                      | Postconcussion syndrome (disorder)                    | 7        | 1.3      |
|                      | Injury of face (disorder)                             | 6        | 1.1      |
|                      | Subarachnoid hemorrhage (disorder)                    | 6        | 1.1      |
|                      | Neck pain (finding)                                   | 5        | 0.9      |
|                      | Backache                                              | 4        | 0.7      |
|                      | Intracranial injury without skull fracture (disorder) | 4        | 0.7      |
|                      | Laceration of forehead (disorder)                     | 4        | 0.7      |
|                      | Closed fracture of clavicle (disorder)                | 3        | 0.5      |

|                                                                    |   |     |
|--------------------------------------------------------------------|---|-----|
| Dizziness (finding)                                                | 3 | 0.5 |
| Fracture of maxilla (disorder)                                     | 3 | 0.5 |
| Fracture of rib (disorder)                                         | 3 | 0.5 |
| Injury of neck (disorder)                                          | 3 | 0.5 |
| Laceration - injury (disorder)                                     | 3 | 0.5 |
| Soft tissue injury (disorder)                                      | 3 | 0.5 |
| Subdural hematoma (disorder)                                       | 3 | 0.5 |
| -                                                                  | 2 | 0.4 |
| Abrasion of face (disorder)                                        | 2 | 0.4 |
| Abrasion of head (disorder)                                        | 2 | 0.4 |
| Alcohol abuse (disorder)                                           | 2 | 0.4 |
| Brief loss of consciousness (finding)                              | 2 | 0.4 |
| Closed fracture of facial bone (disorder)                          | 2 | 0.4 |
| Fracture of cervical spine (disorder)                              | 2 | 0.4 |
| Fracture of face bones (disorder)                                  | 2 | 0.4 |
| Fracture of phalanx of finger (disorder)                           | 2 | 0.4 |
| Fracture of vertebral column without spinal cord injury (disorder) | 2 | 0.4 |
| Hematoma of face (disorder)                                        | 2 | 0.4 |
| Laceration of lip (disorder)                                       | 2 | 0.4 |
| Motor vehicle accident passenger (finding)                         | 2 | 0.4 |
| Scalp laceration (disorder)                                        | 2 | 0.4 |
| Superficial laceration of face (disorder)                          | 2 | 0.4 |
| Blunt injury (disorder)                                            | 1 | 0.2 |
| Cerebral hemorrhage (disorder)                                     | 1 | 0.2 |
| Closed fracture carpal bone (disorder)                             | 1 | 0.2 |

---

|                                                               |   |     |
|---------------------------------------------------------------|---|-----|
| Closed fracture of base of skull (disorder)                   | 1 | 0.2 |
| Closed fracture of multiple ribs (disorder)                   | 1 | 0.2 |
| Closed fracture of of navicular bone of wrist (disorder)      | 1 | 0.2 |
| Closed fracture of one or more phalanges of hand (disorder)   | 1 | 0.2 |
| Closed fracture of orbital floor (blow-out) (disorder)        | 1 | 0.2 |
| Closed fracture of rib (disorder)                             | 1 | 0.2 |
| Closed fracture of shaft of fibula (disorder)                 | 1 | 0.2 |
| Closed fracture of upper end of tibia (disorder)              | 1 | 0.2 |
| Compression fracture of vertebral column (disorder)           | 1 | 0.2 |
| Contusion (disorder)                                          | 1 | 0.2 |
| Contusion of cerebrum (disorder)                              | 1 | 0.2 |
| Contusion of shoulder region (disorder)                       | 1 | 0.2 |
| Crushing injury of skull and intracranial contents (disorder) | 1 | 0.2 |
| Did not wait for treatment (finding)                          | 1 | 0.2 |
| Elbow fracture (disorder)                                     | 1 | 0.2 |
| Epidural hemorrhage (disorder)                                | 1 | 0.2 |
| Finding related to falls (finding)                            | 1 | 0.2 |
| Floaters in visual field (finding)                            | 1 | 0.2 |
| Foot swelling (finding)                                       | 1 | 0.2 |
| Fracture of distal end of radius (disorder)                   | 1 | 0.2 |
| Fracture of lumbar spine (disorder)                           | 1 | 0.2 |
| Fracture of mandible closed (disorder)                        | 1 | 0.2 |
| Fracture of multiple ribs (disorder)                          | 1 | 0.2 |
| Fracture of orbit (disorder)                                  | 1 | 0.2 |
| Fracture of orbital roof (disorder)                           | 1 | 0.2 |

---

---

|                                              |   |     |
|----------------------------------------------|---|-----|
| Fracture of pelvis (disorder)                | 1 | 0.2 |
| Fracture of pubis (disorder)                 | 1 | 0.2 |
| Fracture of skull (disorder)                 | 1 | 0.2 |
| Fracture of sternum (disorder)               | 1 | 0.2 |
| Fracture of thoracic spine (disorder)        | 1 | 0.2 |
| Fracture of upper jaw closed (disorder)      | 1 | 0.2 |
| Fracture of vertebral column (disorder)      | 1 | 0.2 |
| Hematoma (disorder)                          | 1 | 0.2 |
| Injury of facial nerve (disorder)            | 1 | 0.2 |
| Injury of kidney (disorder)                  | 1 | 0.2 |
| Injury of pancreas (disorder)                | 1 | 0.2 |
| Injury of shoulder region (disorder)         | 1 | 0.2 |
| Intervertebral disc prolapse (disorder)      | 1 | 0.2 |
| Intracranial hemorrhage (disorder)           | 1 | 0.2 |
| Laceration of eye region (disorder)          | 1 | 0.2 |
| Loss of consciousness (finding)              | 1 | 0.2 |
| Migraine (disorder)                          | 1 | 0.2 |
| Motor vehicle accident driver (finding)      | 1 | 0.2 |
| Multiple fractures (disorder)                | 1 | 0.2 |
| Muscle strain (disorder)                     | 1 | 0.2 |
| Neck sprain (disorder)                       | 1 | 0.2 |
| Open fracture of nasal bones (disorder)      | 1 | 0.2 |
| Open fracture of patella (disorder)          | 1 | 0.2 |
| Open fracture of tibia AND fibula (disorder) | 1 | 0.2 |
| Open wound of lower leg (disorder)           | 1 | 0.2 |



---

|                                                   |   |     |
|---------------------------------------------------|---|-----|
| Pins and needles (finding)                        | 1 | 0.2 |
| Recurrent falls (finding)                         | 1 | 0.2 |
| Shoulder pain (finding)                           | 1 | 0.2 |
| Sprain of wrist (disorder)                        | 1 | 0.2 |
| Strain of neck muscle (disorder)                  | 1 | 0.2 |
| Superficial injury of face (disorder)             | 1 | 0.2 |
| Superficial injury of head (disorder)             | 1 | 0.2 |
| Syncope (disorder)                                | 1 | 0.2 |
| Transient global amnesia (finding)                | 1 | 0.2 |
| Traumatic dislocation of clavicle (disorder)      | 1 | 0.2 |
| Traumatic subdural hemorrhage (disorder)          | 1 | 0.2 |
| Unexplained falls (finding)                       | 1 | 0.2 |
| Victim of trauma with multiple injuries (finding) | 1 | 0.2 |
| Vomiting (disorder)                               | 1 | 0.2 |
| Wound discharge (finding)                         | 1 | 0.2 |

---

**Table S4.** Significant differences ( $p < .05$ ) between people with and without recorded mTBI diagnosis in Emergency Department (ED) records and/or ED discharge codes indicative of mild traumatic brain injury (mTBI), among confirmed mTBI cases (N=351).

| Confirmed mTBI cases (N=351) |                                                           |                                                       |                                            |                                                                         |                                                                        |                                            |
|------------------------------|-----------------------------------------------------------|-------------------------------------------------------|--------------------------------------------|-------------------------------------------------------------------------|------------------------------------------------------------------------|--------------------------------------------|
|                              | Cases<br>with no<br>recorded mTBI<br>diagnosis<br>(N=269) | Cases<br>with recorded<br>mTBI<br>diagnosis<br>(N=81) | Statistical<br>comparison<br><br>p value\$ | Cases<br>with no ED<br>discharge codes<br>indicative of mTBI<br>(N=314) | Cases<br>with ED<br>discharge codes<br>indicative of<br>mTBI<br>(N=37) | Statistical<br>comparison<br><br>p value\$ |
|                              | N (%)                                                     | N (%)                                                 |                                            | N (%)                                                                   | N (%)                                                                  |                                            |
| Non-traffic-related injury   | 186 (69.1)                                                | 66 (81.5)                                             | 0.03                                       | 93 (30.6)                                                               | 3 (8.1)                                                                | 0.004                                      |
| Discharge destination        |                                                           |                                                       | 0.0005                                     |                                                                         |                                                                        | 0.01                                       |
| Discharged home              | 104 (38.7)                                                | 29 (35.8)                                             |                                            | 119 (37.9)                                                              | 14 (37.8)                                                              |                                            |

|                                              |            |           |         |            |           |         |
|----------------------------------------------|------------|-----------|---------|------------|-----------|---------|
| Admitted to ED                               | 104 (38.7) | 17 (21)   |         | 115 (36.6) | 6 (16.2)  |         |
| Admitted to ward                             | 61 (22.7)  | 35 (43.2) |         | 80 (25.5)  | 17 (46)   |         |
| Intracranial injuries on head CT             | 4 (2)      | 26 (42.6) | <0.0001 | 16 (6.7)   | 14 (50)   | <0.0001 |
| Headache                                     | 103 (38.3) | 46 (56.8) | 0.009   | 127 (40.5) | 22 (59.5) | 0.03    |
| Concentration problems                       | 0 (0)      | 4 (4.9)   | 0.001   | 2 (0.6)    | 2 (5.4)   | 0.01    |
| Follow-up recommendations                    | 83 (30.9)  | 44 (54.3) | 0.0003  | 106 (33.8) | 22 (59.5) | 0.002   |
| PTA measured                                 | 125 (46.5) | 56 (69.1) | 0.0003  | -          | -         | -       |
| Recorded mTBI diagnosis in the<br>ED records | -          | -         | -       | 85 (27.1)  | 16 (43.2) | 0.04    |

§  $\chi^2$ , z-test, t-test.

**Table S5.** Significant differences ( $p < .05$ ) between people tested for Post-traumatic Amnesia (PTA) versus those not tested, among confirmed mild traumatic brain injury (mTBI) (N=351) and indeterminate cases (N=180).

|                                | Confirmed mTBI cases (N=351)              |                                       |                        | Indeterminate mTBI cases (N=180)              |                                          |                        |
|--------------------------------|-------------------------------------------|---------------------------------------|------------------------|-----------------------------------------------|------------------------------------------|------------------------|
|                                | Confirmed mTBI not tested for PTA (N=169) | Confirmed mTBI tested for PTA (N=182) | Statistical comparison | Indeterminate mTBI not tested for PTA (N=134) | Indeterminate mTBI tested for PTA (N=46) | Statistical comparison |
|                                | N (%)                                     | N (%)                                 | p values§              | N (%)                                         | N (%)                                    | p values§              |
| Transported to ED by ambulance | 108 (63.9)                                | 142 (78)                              | 0.004                  | 30 (22.4)                                     | 26 (56.5)                                | <0.0001                |
| Traffic-related injury         | 32 (18.9)                                 | 67 (36.8)                             | 0.0002                 | 23 (17.2)                                     | 21 (45.7)                                | 0.0001                 |
| Discharge destination          |                                           |                                       | <0.0001                |                                               |                                          | <0.0001                |
| Discharged home                | 98 (58)                                   | 35 (19.2)                             |                        | 106 (79.1)                                    | 21 (45.7)                                |                        |
| Admitted to ED                 | 43 (25.4)                                 | 78 (42.9)                             |                        | 21 (15.7)                                     | 15 (32.6)                                |                        |
| Admitted to ward               | 28 (16.6)                                 | 69 (37.9)                             |                        | 7 (5.2)                                       | 10 (21.7)                                |                        |

|                                  |            |            |         |   |   |   |
|----------------------------------|------------|------------|---------|---|---|---|
| LOC reported                     | 49 (34.8)  | 85 (53.1)  | 0.005   | - | - | - |
| Amnesia reported                 | 85 (71.4)  | 140 (91.5) | <0.0001 | - | - | - |
| Brain CT performed               | 116 (68.6) | 150 (82.4) | 0.003   | - | - | - |
| Intracranial injuries on head CT | 2 (1.7)    | 28 (18.6)  | <0.0001 | - | - | - |
| § $\chi^2$ , z-test, t-test      |            |            |         |   |   |   |

**Figure S1.** Percent of screened ED presentations aged 18-65 years with confirmed or indeterminate mTBI (total 30 479 screened, 351 confirmed mTBI (1.15%), 180 indeterminate mTBI (0.6%).

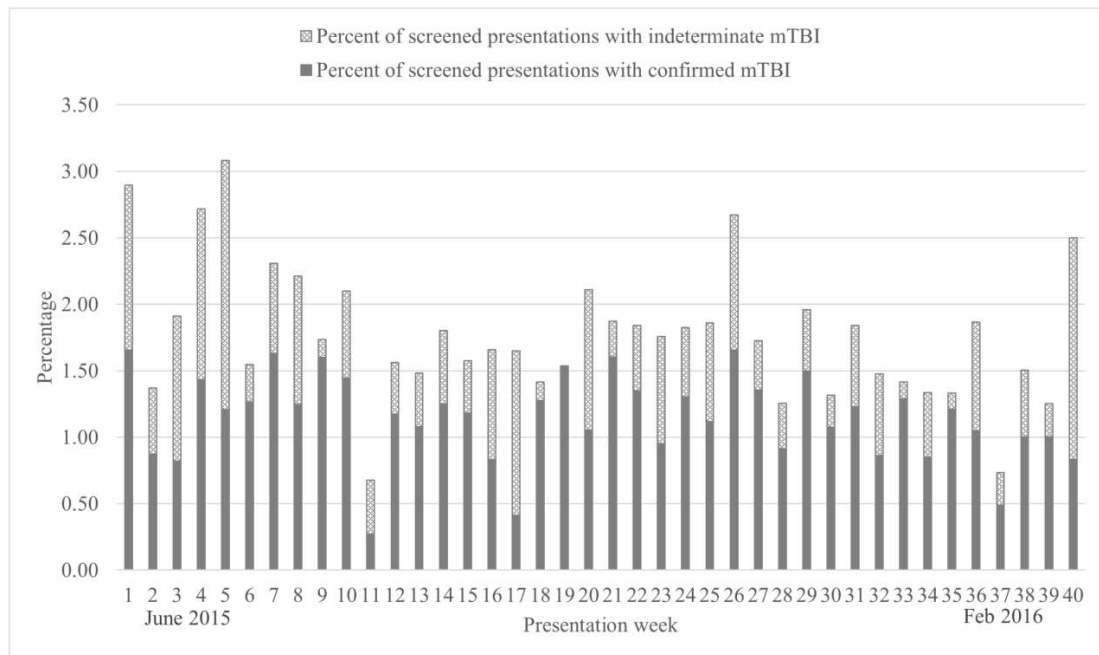

Supplement: bmjopen-2019-034494supp001.pdf [file bmjopen-2019-034494supp001.pdf]
