# Supplementary material for: Challenges in the acute identification of mild traumatic brain injuries: results from an emergency department surveillance study
Source: PubMed Central journal article supplement — BMJ Open. 2020 Feb 3;10(2):e034494. doi: 10.1136/bmjopen-2019-034494 (PMC7045153; doi:10.1136/bmjopen-2019-034494), 2020-02-03
Supplement: bmjopen-2019-034494.draft_revisions.pdf [file bmjopen-2019-034494.draft_revisions.pdf]

# BMJ Open

BMJ Open is committed to open peer review. As part of this commitment we make the peer review history of every article we publish publicly available.

When an article is published we post the peer reviewers' comments and the authors' responses online. We also post the versions of the paper that were used during peer review. These are the versions that the peer review comments apply to.

The versions of the paper that follow are the versions that were submitted during the peer review process. They are not the versions of record or the final published versions. They should not be cited or distributed as the published version of this manuscript.

BMJ Open is an open access journal and the full, final, typeset and author-corrected version of record of the manuscript is available on our site with no access controls, subscription charges or pay-per-view fees (<http://bmjopen.bmj.com>).

If you have any questions on BMJ Open's open peer review process please email [info.bmjopen@bmj.com](mailto:info.bmjopen@bmj.com)

# BMJ Open

## Challenges in the acute identification of mild traumatic brain injuries: results from an emergency department surveillance study

|                               |                                                                                                                                                                                                                                                                                                                                                                                                                                                                                                                                                                                                                                                                                                                                    |
|-------------------------------|------------------------------------------------------------------------------------------------------------------------------------------------------------------------------------------------------------------------------------------------------------------------------------------------------------------------------------------------------------------------------------------------------------------------------------------------------------------------------------------------------------------------------------------------------------------------------------------------------------------------------------------------------------------------------------------------------------------------------------|
| Journal:                      | <i>BMJ Open</i>                                                                                                                                                                                                                                                                                                                                                                                                                                                                                                                                                                                                                                                                                                                    |
| Manuscript ID                 | bmjopen-2019-034494                                                                                                                                                                                                                                                                                                                                                                                                                                                                                                                                                                                                                                                                                                                |
| Article Type:                 | Original research                                                                                                                                                                                                                                                                                                                                                                                                                                                                                                                                                                                                                                                                                                                  |
| Date Submitted by the Author: | 24-Sep-2019                                                                                                                                                                                                                                                                                                                                                                                                                                                                                                                                                                                                                                                                                                                        |
| Complete List of Authors:     | Pozzato, Ilaria; University of Sydney, John Walsh Centre for Rehabilitation Research; University of Sydney - John Walsh Centre for Rehabilitation Research<br>Meares, Susanne; Macquarie University<br>Kifley, Annette; University of Sydney, Centre for Vision Research<br>Craig, Ashley; University of Sydney, Northern Clinical School;<br>Gillett, Mark; University of Sydney, Rehabilitation Studies Unit<br>Vu, Kim Van; University of Sydney, John Walsh Centre for Rehabilitation Research, Kolling Institute<br>Liang, Anthony; University of Sydney, Centre for Vision Research<br>Cameron, Ian; University of Sydney, Rehabilitation Studies Unit<br>Gopinath, Bamini; University of Sydney, Centre for Vision Research |
| Keywords:                     | ACCIDENT & EMERGENCY MEDICINE, EPIDEMIOLOGY, Neurological injury < NEUROLOGY, PUBLIC HEALTH, TRAUMA MANAGEMENT                                                                                                                                                                                                                                                                                                                                                                                                                                                                                                                                                                                                                     |
|                               |                                                                                                                                                                                                                                                                                                                                                                                                                                                                                                                                                                                                                                                                                                                                    |

SCHOLARONE™  
Manuscripts

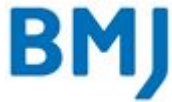

I, the Submitting Author has the right to grant and does grant on behalf of all authors of the Work (as defined in the below author licence), an exclusive licence and/or a non-exclusive licence for contributions from authors who are: i) UK Crown employees; ii) where BMJ has agreed a CC-BY licence shall apply, and/or iii) in accordance with the terms applicable for US Federal Government officers or employees acting as part of their official duties; on a worldwide, perpetual, irrevocable, royalty-free basis to BMJ Publishing Group Ltd ("BMJ") its licensees and where the relevant Journal is co-owned by BMJ to the co-owners of the Journal, to publish the Work in this journal and any other BMJ products and to exploit all rights, as set out in our [licence](#).

The Submitting Author accepts and understands that any supply made under these terms is made by BMJ to the Submitting Author unless you are acting as an employee on behalf of your employer or a postgraduate student of an affiliated institution which is paying any applicable article publishing charge ("APC") for Open Access articles. Where the Submitting Author wishes to make the Work available on an Open Access basis (and intends to pay the relevant APC), the terms of reuse of such Open Access shall be governed by a Creative Commons licence – details of these licences and which [Creative Commons](#) licence will apply to this Work are set out in our licence referred to above.

Other than as permitted in any relevant BMJ Author's Self Archiving Policies, I confirm this Work has not been accepted for publication elsewhere, is not being considered for publication elsewhere and does not duplicate material already published. I confirm all authors consent to publication of this Work and authorise the granting of this licence.

1  
2  
3 **Challenges in the acute identification of mild traumatic brain injuries: results from an**  
4 **emergency department surveillance study**  
5  
6  
7  
8  
9

10 Ilaria Pozzato<sup>1</sup> MD, MMed

11  
12 Susanne Meares<sup>2</sup> PhD

13  
14 Annette Kifley<sup>1</sup> PhD

15  
16 Ashley Craig<sup>1</sup> PhD

17  
18 Mark Gillett<sup>3</sup> MD, MclinEd

19  
20 Kim Van Vu<sup>1</sup> B

21  
22 Anthony Liang<sup>1</sup> B

23  
24 Ian D Cameron<sup>1</sup> PhD

25  
26 Bamini Gopinath<sup>1</sup> PhD  
27  
28  
29  
30  
31  
32

33 <sup>1</sup> John Walsh Centre for Rehabilitation Research, Sydney Medical School, Kolling Institute of  
34 Medical Research, The University of Sydney, Sydney, Australia.  
35

36 <sup>2</sup> Department of Psychology, Macquarie University, Sydney, Australia.  
37

38 <sup>3</sup> Emergency Department, Royal North Shore Hospital, Sydney, Australia.  
39  
40  
41  
42  
43

44 Correspondence to: Bamini Gopinath

45  
46 John Walsh Centre for Rehabilitation Research, The University of Sydney,  
47

48 Kolling Institute of Medical Research  
49

50 Corner Reserve Road & Westbourne Street, Royal North Shore Hospital  
51

52 St Leonards, NSW 2065, Australia  
53

54 Telephone: 61 2 9926 4962 Fax: 61 2 9926 4045  
55

56 Email: [bamini.gopinath@sydney.edu.au](mailto:bamini.gopinath@sydney.edu.au)  
57  
58  
59  
60

1  
2  
3  
4  
5  
6  
7  
8  
9  
10  
11  
12  
13  
14  
15  
16  
17  
18  
19  
20  
21  
22  
23  
24  
25  
26  
27  
28  
29  
30  
31  
32  
33  
34  
35  
36  
37  
38  
39  
40  
41  
42  
43  
44  
45  
46  
47  
48  
49  
50  
51  
52  
53  
54  
55  
56  
57  
58  
59  
60

Abstract: 260/300; Text: 3654/400; Tables: 4; Figures: 1; Supplementary material:4.

For peer review only

## ABSTRACT

**Objectives:** To establish the proportion of mild traumatic brain injury (mTBI) diagnosis among people presenting to an Emergency Department (ED), to determine the accuracy of recorded ED diagnoses. We also aimed to describe challenges in mTBI case identification and its acute hospital management.

**Design and Setting:** A retrospective chart review of all ED attendances to a major trauma hospital, over a 9-month period (June 2015-February 2016).

**Participants:** Adults aged 18-65 years consecutively presenting to an ED.

**Primary Outcome Measures:** Proportion of mTBI diagnosis among ED attendances, (i.e. confirmed mTBI based on the World Health Organization (WHO) criteria or indeterminate mTBI based on secondary criteria), and proportion of accurately recorded mTBI diagnosis by ED clinicians (i.e. 'mTBI, 'concussion').

**Results:** Of 30 479 ED attendances, 351 (1.15%) confirmed mTBI diagnosis and 180 (0.6%) indeterminate diagnosis were identified. Only 81 (23.1%) individuals with a confirmed mTBI had a 'mTBI diagnosis' clearly recorded in the medical notes. Of the allocated discharge diagnosis codes to the two identified cohorts, 89.8% were not indicative of mTBI. Intracranial injuries were found in 31 (8.5%) confirmed cases. Glasgow Coma Scale scores were consistently assessed in the ED but identified only 117 (33.3%) confirmed mTBI cases. Post-traumatic amnesia (PTA) testing was able to confirm acute cognitive impairment, in 113 (62.1%) of those who were tested (182, 51.3%).

**Conclusions:** mTBI is a prevalent, but an under-recognized cause for ED attendance. Despite challenges, the use of an operational definition such as the WHO diagnostic criteria can improve accuracy in mTBI identification. Acute management may be enhanced by rapid assessment of PTA.

## STRENGTHS AND LIMITATIONS OF THIS STUDY

- A systematic chart review of all Emergency Department attendances was employed to capture any possible mild traumatic brain injury (mTBI) case.
- The use of standard diagnostic criteria to establish the occurrence of mTBI diagnosis, ensures accuracy in identification and comparability across existing research.
- Provides novel data on proportions of rapid post-traumatic amnesia screening in NSW, Australia, where there is written recommendation around PTA screening in all Emergency Departments.
- Collecting data from single hospital site limits generalizability of study findings.
- Given the retrospective design, conclusions on mTBI occurrence and accuracy of designation were limited by the availability of documented clinical information.

## INTRODUCTION

Mild traumatic brain injuries (mTBI) are a serious public health problem that is referred to as a 'silent epidemic'. [1] Though being the least severe of all brain injuries, identification is the most challenging, with mTBI often missed at diagnosis. [2] Major barriers to mTBI identification are the wide variability in criteria used for diagnosis and the lack of sensitive standardized measures for identifying mTBI manifestations, which are commonly subtle and rapidly-resolving. [2, 3] Despite these limitations, the World Health Organization (WHO) best-evidence review estimated that hospital-treated mTBI are in the range of 100-300/100 000 population. [4] Diagnosis and management of mTBI largely occur in an emergency department (ED). [5] Little information exists, however, about the accuracy of mTBI identification in emergency settings. Two studies, conducted in three Canadian EDs [6] and two EDs in the US, [7] found that up to 50% of patients sustaining mTBI received an inaccurate ED diagnosis. Poor identification likely impacts clinical management of these patients. Given trends in increasing ED attendances for head trauma [8, 9] there is a critical need to for research that addresses the challenges in mTBI diagnosis.

Another challenge for ED clinicians is the identification of mTBI cases at major risk of complications versus those who can be safely discharged. [10] Latest research suggests that these so-called minor injuries can have long-term impacts that extend beyond the anticipated 3-month timeframe of cognitive recovery for uncomplicated cases, calling for urgent improvements in the acute management of mTBI. Long-term impacts include higher health care usage [11], psychosocial complications [12, 13] and in vulnerable subgroups chronic cognitive symptomatology [12, 14] and neural cellular alterations [15, 16] not easily detectable by routine radiological examinations that may increase the risk of neurodegeneration. [17] EDs represent a crucial point where accurate identification and early management of these patients may prevent long-term personal and economic impacts.



1  
2  
3 Key steps to aid early and accurate identification and management of mTBI include  
4 enhanced consistency in diagnostic criteria and standardized assessment methods.[3] An  
5 internationally-recognised operational definition was developed by the WHO Task Force,[3, 4]  
6 clearly outlining the four key clinical manifestations for mTBI diagnosis. These are:(i) an  
7 altered state of consciousness, (ii) confusion or disorientation, (iii) post-traumatic amnesia  
8 (PTA) and (iv) transient neurological abnormalities, such as computed tomography (CT)-  
9 detected intracranial injuries, the latter defined as complicated mTBI (about 10% of cases).[18]  
10 Recommended objective measures to assess TBI 'severity' include conventional radiology to  
11 exclude structural lesions and the Glasgow Coma Scale (GCS) to monitor consciousness levels  
12 (i.e. mTBI is defined as GCS scores of 13-15 out of 15). However, no clear guidance is given  
13 by the WHO on the clinical assessment of the other TBI diagnostic criteria. [4] This  
14 particularly applies to PTA, which is recognized as the best prognostic indicator of mTBI  
15 outcomes. [19, 20]

16  
17  
18  
19  
20  
21  
22  
23  
24  
25  
26  
27  
28  
29  
30  
31  
32  
33 PTA is a complex clinical concept reflecting an acute transient cognitive dysfunction [21]  
34 that presents not only as amnesia but more broadly as a period of inability to store new  
35 information, confusion, disorientation or behavioural changes. [3, 21] While standardized  
36 testing exist to assess the resolution of acute cognitive dysfunction (i.e. PTA) these are rarely  
37 used in the acute management of mTBI patients because many protocols are too lengthy to be  
38 administered in ED settings.[21] In NSW, Australia, the Abbreviated Westmead PTA Scale  
39 (A-WPTAS), [21] was specifically designed for ED use and recommended statewide, [22] as a  
40 brief validated measure of PTA to improve identification of traumatic brain injury events  
41 among closed head injury patients with a GCS of 13-15.[22] This measure includes five GCS  
42 orientation items plus a memory test of recall of three picture cards learnt on the first trial. The  
43 test is repeated hourly for up to four hours until optimal scores of 18 out of 18 are obtained  
44 (i.e.15 on the GCS, plus 3 on the memory test), indicating a resolution of PTA, if present.

1  
2  
3 Though the A-WPTAS has been shown to assist with a safer discharge of people with mTBI,  
4 by identifying cases with a GCS of 15/15 who remain acutely cognitively impaired, [20] and  
5 reducing hospitalization and direct costs [23], its implementation to date appears inconsistent.  
6  
7 Unpublished Australian data showed that rates of PTA screening in ED range from 0 to 31%,  
8 [10] while findings from a recent randomized controlled trial showed lower rates (i.e. below  
9 13%). [24] This highlights the need for further studies to investigate the extent and possible  
10 benefit of A-WPTAS implementation in emergency settings.  
11  
12  
13  
14  
15  
16  
17  
18

19 Given the current challenges in mTBI diagnosis and limitations of existing  
20 epidemiological research, this study is unique as it aims to: (i) use standard diagnostic criteria  
21 to define the occurrence of mTBI diagnosis among ED attendances, and to establish what  
22 proportion of these had a clearly recorded mTBI diagnosis in their clinical records and/or else  
23 a diagnosis code suggestive of mTBI assigned by ED clinicians; (ii) describe operational issues  
24 in case identification; and (iii) acute management of mTBI, in particular the implementation of  
25 a validated measure for PTA screening in ED.  
26  
27  
28  
29  
30  
31  
32  
33  
34  
35  
36  
37

## 38 **METHODS**

39 This is a retrospective cohort study, employing chart review and standard WHO  
40 diagnostic criteria to define occurrence of mTBI among adults aged 18-65 years with ED  
41 attendances of a major trauma hospital in Sydney, Australia, over a 9-month period (from June  
42 2015 to February 2016). Ethical approval was obtained from the Northern Sydney Local Health  
43 District Ethics, Sydney, Australia (LNR/16/HAWKE/388; LNRSSA/16/HAWKE/389). Two  
44 independent chart auditors systematically screened all ED attendances within the study period  
45 and reviewed all recorded information in ambulance reports, ED and medical notes, to  
46 determine whether mTBI occurred. Details of the study method are available. [25] Patients or  
47  
48  
49  
50  
51  
52  
53  
54  
55  
56  
57  
58  
59  
60

1  
2  
3 the public were not involved in the design, or conduct, or reporting, or dissemination of our  
4  
5 research.  
6

7  
8 The main outcomes were: (i) proportions of identified mTBI diagnosis, meeting WHO  
9  
10 diagnostic criteria, among total ED attendances within 24 hours post-injury, meeting study age-  
11  
12 range and timeframe, and (ii) proportions of accurately recorded mTBI diagnoses by ED  
13  
14 clinicians based on positive mTBI-related definition documented in the medical record. A  
15  
16 confirmed mTBI diagnosis was ascertained based on WHO criteria (Table 1-2): [4, 21] a GCS  
17  
18 of 13–15 30 minutes after injury or on later presentation to healthcare; and/or PTA <24-hours,  
19  
20 confusion/disorientation, loss of consciousness (LOC) of  $\leq 30$  mins and/or CT-detected  
21  
22 intracranial injuries not requiring neurosurgery.  
23  
24

25  
26 Despite the uniqueness of this study in using a validated measure for PTA screening in  
27  
28 ED, initial chart review indicated PTA testing was not consistently administered. Further,  
29  
30 optimal scores obtained during ED stay would still not be able to identify cases whose PTA  
31  
32 resolved early post-injury [2] (i.e. optimal scores meaning that PTA, if present, had resolved).  
33  
34 These cases could, instead, be identified by any evidence of PTA manifestations (i.e. any gap in  
35  
36 memory, period of confusion/disorientation, behavioral changes) documented by ambulance  
37  
38 and emergency staff in their clinical observations. Therefore, to ascertain the presence of PTA  
39  
40 as criterium for mTBI occurrence, a summary PTA-related mTBI designation (Table 3) was  
41  
42 developed by cross-checking any PTA-related neurological and behavioural disturbances  
43  
44 documented in medical records, from the time of injury to hospital discharge. A positive PTA  
45  
46 designation was defined by any of the following source: acute cognitive impairment on A-  
47  
48 WPTAS testing, observed behavioural change suggestive of PTA (e.g. repetitive questioning,  
49  
50 combative behaviour), as well as any observed/self-reported gap in memory, or  
51  
52 confusion/disorientation thereby fulfilling two of the WHO criteria. [3, 21]  
53  
54  
55  
56  
57  
58  
59  
60

1  
2  
3 In the absence of any documented WHO criterion, indeterminate evidence of mTBI [26]  
4 was defined based on the presence of any secondary criteria: [20] (i) optimal scores (i.e. 18/18)  
5 on the second trial of the A-WPTAS indicating that PTA, if present, had resolved, (ii)  
6 symptoms that may correspond to ‘post-concussion symptoms’ but which are not specific to  
7 mTBI,[25] (iii) transient neurological abnormalities (excluding intracranial injuries not  
8 requiring surgery), which are not common findings or clinical features of mTBI [2, 3] and are  
9 not recommended as stand-alone mTBI criteria,[2] or (iii) queried LOC/amnesia.

10  
11  
12  
13  
14  
15  
16  
17  
18  
19 The accuracy of the diagnosis given by ED clinicians to the identified individuals with  
20 mTBI diagnosis was assessed by the presence of any recorded ‘mTBI’, ‘concussion’, ‘post-  
21 concussion symptoms/syndrome’ diagnoses in medical notes.[27] In addition, allocation of  
22 relevant mTBI-related discharge diagnosis codes (SNOWMED codes) was also explored, to  
23 inform how much routinely collected administrative data could be useful for brain injury  
24 diagnostic purpose.

## 35 RESULTS

### 37 Identified cases with mTBI diagnosis

38  
39 During the study period, 30 479 adults aged 18-65 years attended the ED and were screened  
40 (Figure 1). Of the 587 mTBI-related ED presentations initially identified, 56 cases were  
41 excluded due to: (N=27) self-discharge or unclear evidence of mTBI, (N=8) confounding  
42 factors (e.g. intubation, psychosis, medical comorbidities) or possible moderate TBI (e.g.  
43 LOC/amnesia of unclear duration). Also excluded were 21 (3.9%) individuals who represented  
44 for the same mTBI event. Among total ED attendances, 351 (1.15%) confirmed mTBI  
45 diagnoses and an additional 180 (0.6%) cases with insufficient/indeterminate mTBI evidence  
46 were identified (Figure S1, Supplemental Material). Of these, two people (0.4%) sustained  
47  
48  
49  
50  
51  
52  
53  
54  
55  
56  
57  
58  
59  
60

1  
2  
3 multiple mTBI (i.e. repetitive mTBI). Sociodemographic, injury-related and acute management  
4 details are illustrated in Table 1.  
5  
6

7  
8 A clearly recorded mTBI diagnosis in ED records [27] was present only in 23.1% (N=81)  
9  
10 of confirmed mTBI and 18.9% (N=34) of indeterminate cases. Similarly, among the 551 ED  
11 diagnosis codes (i.e. SNOWMED codes) (Table 4) allocated to the two identified cohorts, the  
12 most commonly used code descriptor was 'injury of head' (N=145, 26.3%). Only 56 of these  
13 codes (10.2%) were specifically indicative of brain injury occurrence, with 'concussion' being  
14 the most common (N=26, 46.4%). The remaining codes mostly reflected intracranial injury  
15 findings (see also Table S1, Supplemental Material, which shows the full list of ED discharge  
16 diagnosis codes).  
17  
18  
19  
20  
21  
22  
23  
24  
25

26 Confirmed mTBI cases that were given a clearly-recorded mTBI diagnosis and/or a  
27 discharge code suggestive of mTBI were more likely to (Table S2, Supplemental Material): be  
28 a non-traffic-crash related mTBI ( $p<.05$ ), be admitted to a ward ( $p<.05$ ), have CT-detected  
29 intracranial injuries ( $p<.0001$ ), present with headaches ( $p<.05$ ) and/or concentration problems  
30 ( $p<.05$ ), and be recommended for follow-up care ( $p<.01$ ). Furthermore, those with a clearly-  
31 recorded mTBI diagnosis were more likely to have been tested for PTA ( $p=.0003$ ), while those  
32 with an allocated discharge code suggestive of mTBI were more likely to have a clearly written  
33 mTBI diagnosis in their ED records also ( $p=.04$ ).  
34  
35  
36  
37  
38  
39  
40  
41  
42  
43  
44  
45  
46

### 47 **Injury-related characteristics**

48  
49 Cases with a confirmed mTBI diagnosis met the following WHO criteria: initial GCS of 13-14  
50 (i.e. at the scene 30 minutes post-injury/at ED admission; N=117; 33.3%), LOC (i.e.  
51 witnessed/self-reported; N=185; 52.7%), amnesia (i.e. observed/self-reported; N=229; 65.2%),  
52 confusion/disorientation (N=97; 27.6%), and CT-detected intracranial injuries (N=31; 8.8%).  
53  
54  
55  
56  
57

58 Multiple WHO criteria were present in 186 cases (53%) (Table 2). Cases with an indeterminate  
59  
60

1  
2  
3 mTBI diagnosis met the following secondary criteria in the absence of WHO criteria: optimal  
4 scores of 18/18 on the A-WPTAS (N=45; 25%), presence of post-concussion symptoms (133;  
5 73.9%), transient neurological abnormalities (N=22; 12.2%) queried LOC (N=12; 6.7%) and/or  
6 queried amnesia (N=3; 1.7%). Multiple secondary criteria were present in 32 cases (17.8%).  
7  
8  
9

10  
11  
12 Fall was the most common cause of mTBI in both confirmed (39.1%) and indeterminate  
13 (31.1%) groups, followed by motor vehicle crash (28.2% - confirmed; 24.4% - indeterminate).  
14 Alcohol or drug use in association with the injury was self-reported or clinically observed in  
15 127 (36.2%) confirmed cases compared to only 19 (10.6 %) of indeterminate cases ( $p<.001$ ).  
16  
17  
18  
19  
20  
21  
22

### 23 **Acute hospital management details**

24  
25 Brain imaging was undertaken in 75.8% of cases with a confirmed mTBI diagnosis and 40.6%  
26 of cases with an indeterminate mTBI ( $p<.001$ ; Table 1). Only 182 (51.8%) individuals with a  
27 confirmed mTBI were tested for PTA (i.e. A-WPTAS or WPTAS). Of these, the majority (106;  
28 58.4%) had a PTA duration of >1 to 12 hours, 32 (17.8%) obtained optimal scores of 18/18 (i.e.  
29 did not fail A-WPTAS testing) and 37 (20.4%) had an unknown designation due to  
30 incomplete/missing documentation. Median time to the first PTA testing was 3.7 (2.3-6.1)  
31 hours post-injury for confirmed mTBI diagnosis and 2.5 (1.7-4.9) hours for indeterminate  
32 mTBI.  
33  
34  
35  
36  
37  
38  
39  
40  
41  
42  
43

44  
45 The summary PTA-related mTBI designation (Table 3) including any documented  
46 positive PTA-related findings (i.e. neurological and behavioural disturbances) in the medical  
47 records, identified a total of 260 (74.1%) confirmed mTBI cases with PTA. The majority  
48 (89.8%) were identified based on two WHO criteria of observed/self-reported amnesia (i.e. any  
49 gap in memory) and/or period of confusion/ disorientation, with a further nine people deemed  
50 in PTA only due to failing the A-WPTAS (N=8) or due to reported behavioral changes in  
51  
52  
53  
54  
55  
56  
57  
58  
59  
60

1  
2  
3 medical records, (N=1) (i.e. repetitive questioning). All these nine cases, except one, also met  
4  
5 at least one of the other mTBI WHO criteria (e.g. LOC, GCS=13-14, intracranial injuries).  
6

7  
8 In both groups, people tested for PTA were more likely to (Table S3, Supplemental  
9  
10 Material): be transported to ED by ambulance ( $p<.01$ ); sustain a traffic-related mTBI ( $p<.001$ );  
11  
12 be admitted to ED/ward ( $p<.0001$ ). Confirmed mTBI cases were more likely tested for PTA in  
13  
14 the presence of other mTBI signs, such as LOC ( $p=.005$ ), amnesia ( $p<.0001$ ) and brain imaging  
15  
16 ( $p=0.003$ ) with positive findings ( $p<.0001$ ).  
17  
18  
19  
20

## 21 **DISCUSSION**

22  
23 By using the WHO operational criteria, our study reports an occurrence of confirmed mTBI  
24  
25 diagnosis among ED total attendances of 1.2% (351/30 479). These findings correspond to the  
26  
27 1.1-1.3% proportion observed in a preliminary study, which used the same criteria and methods  
28  
29 for TBI diagnosis [20, 25] therefore confirming the robustness of the proposed WHO  
30  
31 surveillance system for acute mTBI identification. A similar proportion of mTBI cases seeking  
32  
33 emergency care (1.9%; 670/35 096) was also reported in a prospective cohort study conducted  
34  
35 in a large metropolitan ED in New York. [28] This study employed the alike 1993 American  
36  
37 College of Rehabilitation Medicine criteria ,[28], as operational definition, suggesting that  
38  
39 using standard diagnostic criteria can enhance consistency in mTBI identification and  
40  
41 comparability of study findings.  
42  
43  
44  
45

46  
47 Worryingly, only 23.1% (81/351) of our identified cohort with a confirmed mTBI  
48  
49 diagnosis (i.e. meeting the WHO criteria) had an accurate mTBI diagnosis documented in the  
50  
51 medical records (i.e. written diagnosis of ‘concussion’, ‘mTBI’). The proportion of accurate  
52  
53 diagnoses was much lower than reported in two previous prospective studies conducted in  
54  
55 Canada [6] and the US [7] respectively, being  $\geq 50\%$ . While using a retrospective design could  
56  
57  
58  
59  
60

1  
2  
3 account for these differences, global challenges certainly exist in the acute identification of  
4  
5 ‘minor’ TBI events. This study contributes by providing unique Australian data.  
6  
7

8 Poor accuracy in mTBI identification in ED [3, 17] could affect current estimates of 100-  
9  
10 300/100 000 reported in a WHO review,[4] hence, underestimating the ‘true’ incidence of  
11  
12 hospital-treated mTBI. Surveillance systems, such as accurate administrative databases, are  
13  
14 recommended strategies to tackle this problem. However, the use of discharge diagnosis codes,  
15  
16 recommended strategies to tackle this problem. However, the use of discharge diagnosis codes,  
17  
18 such as ICD coding, in hospital databases has previously been shown not to be sensitive in  
19  
20 detecting mTBI. [27, 28] Our results confirm this gap. Only 10.7% (59/551) of ED discharge  
21  
22 diagnosis codes (SNOWMED codes) allocated to the identified cohorts with either a confirmed  
23  
24 or indeterminate mTBI diagnosis were indicative of mTBI. Despite limitations in the number of  
25  
26 diagnoses able to be recorded (i.e. maximum two SNOWMED codes), there seems to be a  
27  
28 trend for ED clinicians to better identify the more ‘severe’ injuries, i.e. those showing positive  
29  
30 CT findings, being admitted to a ward and receiving follow-up care recommendations. By  
31  
32 contrast, uncomplicated mTBI appears to be overlooked, by not receiving an accurate  
33  
34 designation in ED records or accurate coding. There was also an interchangeable use of terms  
35  
36 like ‘concussion’, ‘(mild/minor) head injury’ and ‘mTBI’, as also shown in previous studies,  
37  
38 [3, 17, 28] that suggest a poor clarity in the distinction between those having a traumatic brain  
39  
40 injury versus simple head injuries, thus reiterating the scarce utility of administrative data in  
41  
42 mTBI identification.  
43  
44  
45

46 While the WHO criteria can be regarded as a reliable system for the identification of  
47  
48 individuals who sustained a mTBI , there were challenges in its application. [2] First, it was  
49  
50 unclear how to interpret LOC or amnesia when it was not witnessed/observed as per WHO  
51  
52 recommendations for mTBI identification. It is likely that injured people report a LOC or  
53  
54 amnesia interchangeably, [2] thus, a self-reported LOC/amnesia at the time of the injury  
55  
56  
57  
58  
59  
60



1  
2  
3 suggests a confirmed mTBI diagnosis. Conversely, when LOC/amnesia was queried by a  
4  
5 physician this more likely suggests indeterminate evidence of mTBI.  
6

7  
8 PTA is the most important TBI prognostic indicator, yet the most challenging to evaluate  
9  
10 because it encompasses a series of acute cognitive impairment signs and symptoms. This study  
11  
12 is unique in its way of screening for PTA in ED by means of a validated measure. However,  
13  
14 standard PTA testing was only available in about half of confirmed mTBI cases (51.9%),  
15  
16 though this was considerably higher than previously reported PTA screening rates (up to  
17  
18 31%).<sup>[10, 24]</sup> Also, optimal scores of 18/18 on the A-WTPAS were obtained in 17.8% of those  
19  
20 who were tested. While optimal scores clearly indicate the absence of acute cognitive  
21  
22 dysfunction at the time of assessment (i.e. a person is not in PTA), these cannot exclude that  
23  
24 PTA was present before that time, not being informative for mTBI diagnostic purpose.  
25  
26  
27

28  
29 Therefore, this study used a summary PTA-related mTBI designation, accounting for the  
30  
31 positive presence of any PTA-related neurological and behavioural disturbances recorded in  
32  
33 medical records.<sup>[3, 21]</sup> Using this indicator, we found 260 of the 351 cases with a confirmed  
34  
35 mTBI diagnosis were deemed to be in PTA. Of these, the majority (89.8%) was based on the  
36  
37 presence of observed/self-reported amnesia (i.e. a gap in memory) or confusion/disorientation  
38  
39 (i.e. and meeting two WHO criteria), while 9 (2.6%) cases were further identified based only  
40  
41 on evidence of acute cognitive impairment (i.e. failing PTA testing; N=8) or observed  
42  
43 behavioral changes (N=1), the latter being repetitive questioning that is typically an indirect  
44  
45 sign of PTA. These additional cases, except one, all met at least one of the other WHO criteria  
46  
47 (e.g. LOC, GCS=13-14, intracranial injuries) for mTBI diagnosis.  
48  
49

50  
51 Overall, these findings reiterate that the WHO criteria together constitute the most  
52  
53 reliable surveillance system for mTBI identification and provide useful information to  
54  
55 specifically identify cases whose PTA may have resolved by the time of ED admission.  
56  
57 Additionally, the implementation of PTA testing, providing objective estimates of acute  
58  
59  
60

1  
2  
3 cognitive impairment may assist in monitoring recovery progress towards a safer discharge and  
4  
5 enhance diagnostic accuracy of cases where mTBI indicators are unclear or unavailable. The  
6  
7 administration of brief PTA testing (i.e. the A-WTPAS) as an extension of the GCS, which is  
8  
9 usually assessed at the scene by the ambulance staff, [21] could provide a more accurate  
10  
11 estimate of the presence and duration of PTA, thus of mTBI occurrence.  
12  
13

14  
15 Another challenge was the assessment of transient neurological abnormalities, other than  
16  
17 intracranial injuries. Ruff et al. (2009) suggested these abnormalities in isolation do  
18  
19 not constitute a strong basis for mTBI diagnosis because they are not common or typical  
20  
21 features of mTBI.[2] Thus, these were considered as indeterminate evidence of mTBI. The  
22  
23 WHO also recommends excluding cases whose TBI manifestations can be affected or due to  
24  
25 other factors.[29] Unlike other confounders (e.g. intubation, psychiatric disorder), the influence  
26  
27 of alcohol/drug on mTBI manifestations was particularly difficult to assess due to the lack of  
28  
29 objective blood level measurements. Overall, these cases accounted for 36.2% of confirmed  
30  
31 mTBI, being in the range of previous findings (30-60%). [30, 31]  
32  
33

34  
35 This study confirms that issues exist in identifying the mildest TBIs,[2] whose clinical  
36  
37 manifestations may resolve within <15 minutes post-injury according to the American  
38  
39 Academy of Neurology classification.[2] Considering the amount of missing or non-  
40  
41 informative/optimal indicators among cases with a confirmed mTBI in this study, as also  
42  
43 reported by previous research,[32] along with PTA measured 2-3 hours post-injury,[21] it is  
44  
45 likely that rapid-resolving LOC/amnesia were missed with a bias towards more severe mTBI.  
46  
47 Secondary criteria were established to identify cases with indeterminate evidence of TBI. These  
48  
49 cases constituted 0.6% of ED total attendances and, interestingly, 18.9% of these received a  
50  
51 positive mTBI diagnosis by ED clinicians. Another study using a similar (probabilistic)  
52  
53 approach found delayed functional recovery in the group with debatable mTBI compared to  
54  
55  
56  
57  
58  
59  
60

1  
2  
3 healthy and trauma controls, [26] raising concerns around the need for identifying and treating  
4  
5 less-severe mTBI that may appear to not meet diagnostic criteria.  
6

7  
8 Intracranial injuries were found in 31 (8.8%) cases with a confirmed mTBI diagnosis.  
9

10 [18] Brain CT was performed in 75.8%, plus in 40% of cases with an indeterminate mTBI [18]

11  
12 Clinical assessment remains the gold-standard for mTBI identification, with PTA testing being  
13  
14 the most promising measure. Among those who were tested, the A-WPTAS was able to detect  
15  
16 acute cognitive impairment in 62.1% of cases (113/182), while the GCS was able to detect only  
17  
18 33.5% of cases (117/349).[20] This study further suggests that when PTA is measured it  
19  
20 increases the likelihood of an accurate mTBI designation provided by ED clinicians.  
21  
22

23  
24 Implementation of PTA testing in ED settings should be, thus, extended to all individuals with  
25  
26 a possible mTBI [21, 22] to reduce the risk of missed opportunity for mTBI identification and  
27  
28 to contribute to more accurate clinical decision making and safer discharge of patients.  
29  
30  
31

### 32 33 **Study Limitations**

34  
35 Major strengths of this study were the use of standard diagnostic criteria for the identification  
36  
37 of mTBI and the systematic screening of any cases with a possible mTBI diagnosis among ED  
38  
39 attendances. However, the retrospective design is limiting as we might not have captured  
40  
41 important information on confounding factors or mTBI indicators. Similarly, the absence of  
42  
43 documented information in medical records does not necessarily imply that standard diagnostic  
44  
45 criteria or assessment protocols were not applied by ED clinicians. Generalizability of findings  
46  
47 is limited by the following selection bias:[31] a working-age population, 9-month audit-period,  
48  
49 and using only a single hospital site. Some of these issues will be addressed by conducting a  
50  
51 multi-site study in the future.  
52  
53  
54

### 55 56 57 58 **CONCLUSIONS**

1  
2  
3 MTBI may have higher impacts on emergency care settings than previously anticipated. This  
4  
5 study confirms the use of an operational definition, such as the WHO operational criteria as a  
6  
7 reliable surveillance system for acute identification of mTBI, although challenges still exist in  
8  
9 its meticulous application. Identification, prognosis and acute management of individuals with  
10  
11 mTBI would be greatly enhanced by the implementation of standardised PTA screening (e.g.  
12  
13 A-WPTAS) early after injury. Improvements in clinical and administrative designation of these  
14  
15 injuries requires the use of these data to monitor and address long-term health and economic  
16  
17 impacts of mTBI.  
18  
19  
20  
21  
22  
23  
24  
25  
26  
27  
28  
29  
30  
31  
32  
33  
34  
35  
36  
37  
38  
39  
40  
41  
42  
43  
44  
45  
46  
47  
48  
49  
50  
51  
52  
53  
54  
55  
56  
57  
58  
59  
60

Peer review only

1  
2  
3 **Funding Support:** This study has received research grant support by the Ramsay Research and  
4 Teaching Fund – Northern Sydney Local Health District, Sydney, Australia. The funding  
5 source had no role in study design, data collection and analysis, decision to publish and in the  
6 writing of this manuscript.  
7  
8  
9  
10  
11  
12  
13  
14  
15

16 **Competing interests and Source of Funding:** Ian Cameron’s salary is supported by an  
17 Australian National Health and Medical Research Council, Senior Practitioner Fellowship. For  
18 the remaining authors none were declared.  
19  
20  
21  
22  
23  
24  
25

26 **Contributors:** All authors - IP, SM, AK, AC, MG, KVV, AL, IDC, BG - provided inputs in  
27 study design. IP, KVV, AL, AK, SM and BG were involved in data collection and data  
28 analysis. IP and BG are responsible for publication writing. All authors reviewed and approved  
29 the final version of this manuscript.  
30  
31  
32  
33  
34  
35  
36  
37  
38  
39  
40  
41  
42  
43  
44  
45  
46  
47  
48  
49  
50  
51  
52  
53  
54  
55  
56  
57  
58  
59  
60

## REFERENCES

1. Goldstein M. Traumatic brain injury: a silent epidemic. *Ann Neurol* 1990;27:327.
2. Ruff RM, Iverson GL, Barth JT, et al. Recommendations for diagnosing a mild traumatic brain injury: a National Academy of Neuropsychology education paper. *Arch Clin Neuropsychol* 2009;24:3-10.
3. Kristman VL, Borg J, Godbolt AK, et al. Methodological issues and research recommendations for prognosis after mild traumatic brain injury: results of the International Collaboration on Mild Traumatic Brain Injury Prognosis. *Arch Phys Med Rehabil* 2014;95:S265-S277.
4. Cassidy JD, Carroll L, Peloso P, et al. Incidence, risk factors and prevention of mild traumatic brain injury: results of the WHO Collaborating Centre Task Force on Mild Traumatic Brain Injury. *J Rehabil Med* 2004;36:28-60.
5. Michelson EA, Huff JS, Loparo M, et al. Emergency Department Time Course for Mild Traumatic Brain Injury Workup. *West J Emerg Med* 2018;19:635-640.
6. Rowe BH, Eliyahu L, Lowes J, et al. Concussion diagnoses among adults presenting to three Canadian emergency departments: missed opportunities. *Am J Emerg Med* 2018;36:2144-2151.
7. Powell J, Ferraro J, Dikmen S, et al. Accuracy of mild traumatic brain injury diagnosis. *Arch Phys Med Rehabil* 2008 89:1550-1555.
8. Marin JR, Weaver MD, Yealy DM, et al. Trends in visits for traumatic brain injury to emergency departments in the United States. *JAMA* 2014;311:1917-1919.
9. Gaw CE, Zonfrillo MR. Emergency department visits for head trauma in the United States. *BMC Emerg Med* 2016;16:5.
10. Bosch M, McKenzie JE, Mortimer D, et al. Implementing evidence-based recommended practices for the management of patients with mild traumatic brain injuries in

1  
2  
3 Australian emergency care departments: study protocol for a cluster randomised controlled  
4 trial. *Trials* 2014;15:1-20.

7 11. Kirsch NL, de Leon MB, Maio RF, et al. Characteristics of a mild head injury subgroup  
8 with extreme, persisting distress on the Rivermead Postconcussion Symptoms questionnaire.  
9  
10  
11  
12 *Arch Phys Med Rehabil* 2010;91:35-42.

14 12. Theadom A, Starkey N, Barker-Collo S, et al. Population-based cohort study of the  
15 impacts of mild traumatic brain injury in adults four years post-injury. *PLoS One*  
16  
17 2018;13:e0191655.

19 13. Stein MB, Jain S, Giacino JT, et al. Risk of Posttraumatic Stress Disorder and Major  
20 Depression in Civilian Patients After Mild Traumatic Brain Injury: A TRACK-TBI Study.  
21  
22  
23  
24  
25  
26  
27 *JAMA Psychiatry* 2019;76:249-258.

28 14. Karr JE, Areshenkoff CN, Garcia-Barrera MA. The neuropsychological outcomes of  
29 concussion: A systematic review of meta-analyses on the cognitive sequelae of mild traumatic  
30  
31  
32  
33  
34  
35  
36  
37  
38  
39  
40  
41  
42  
43  
44  
45  
46  
47  
48  
49  
50  
51  
52  
53  
54  
55  
56  
57  
58  
59  
60  
brain injury. *Neuropsychology* 2014;28:321-336.

15. Arneson D, Zhang G, Ying Z, et al. Single cell molecular alterations reveal target cells  
and pathways of concussive brain injury. *Nat Commun* 2018;9:3894.

16. Hocke LM, Duszynski CC, Debert CT, et al. Reduced Functional Connectivity in  
Adults with Persistent Post-Concussion Symptoms: A Functional Near-Infrared Spectroscopy  
Study. *J Neurotrauma* 2018;35:1224-1232.

17. Gardner RC, Yaffe K. Epidemiology of mild traumatic brain injury and  
neurodegenerative disease. *Mol Cell Neurosci* 2015;66:75-80.

18. Stiell IG, Clement CM, Grimshaw JM, et al. A prospective cluster-randomized trial to  
implement the Canadian CT Head Rule in emergency departments. *CMAJ* 2010;182:1527-  
1532.

- 1  
2  
3 19. Tellier A, Marshall SC, Wilson KG, et al. The heterogeneity of mild traumatic brain  
4 injury: Where do we stand? *Brain Inj* 2009;23:879-887.  
5  
6  
7  
8 20. Meares S, Shores EA, Smyth T, et al. Identifying posttraumatic amnesia in individuals  
9 with a Glasgow Coma Scale of 15 after mild traumatic brain injury. *Arch Phys Med Rehabil*  
10 2015;96:956-959.  
11  
12  
13  
14  
15 21. Meares S, Shores EA, Taylor AJ, et al. Validation of the Abbreviated Westmead Post-  
16 traumatic Amnesia Scale: a brief measure to identify acute cognitive impairment in mild  
17 traumatic brain injury. *Brain Inj* 2011;25:1198-1205.  
18  
19  
20  
21 22. NSW Institute of Trauma and Injury Management. Initial management of closed head  
22 injury in adults, second edition. North Sydney: NSW Ministry of Health; 2011.  
23  
24  
25  
26 23. Watson C, Clous E, Jaeger M, et al. Introduction of the Abbreviated Westmead Post-  
27 Traumatic Amnesia Scale and impact on length of stay. *Scand J Surg* 2017;106:356-360.  
28  
29  
30  
31 24. Bosch M, McKenzie JE, Ponsford JL, et al. Evaluation of a targeted, theory-informed  
32 implementation intervention designed to increase uptake of emergency management  
33 recommendations regarding adult patients with mild traumatic brain injury: results of the NET  
34 cluster randomised trial. *Implement Sci* 2019;14:4.  
35  
36  
37  
38  
39  
40 25. Pozzato I, Cameron ID, Meares S, et al. A surveillance study to determine the accuracy  
41 of mild traumatic brain injury diagnosis in an emergency department: protocol for a  
42 retrospective cohort study. *BMJ Open* 2017;7:e016222.  
43  
44  
45  
46  
47 26. Korley FK, Diaz-Arrastia R, Falk HJ, et al. Prevalence of incomplete functional and  
48 symptomatic recovery among patients with head injury but brain injury debatable. *J*  
49 *Neurotrauma* 2017;34:1531-1538.  
50  
51  
52  
53  
54 27. Voss JD, Connolly J, Schwab KA, et al. Update on the epidemiology of  
55 concussion/mild traumatic brain injury. *Curr Pain Headache Rep* 2015;19:32.  
56  
57  
58  
59  
60



- 1  
2  
3 28. Bazarian JJ, Veazie P, Mookerjee S, et al. Accuracy of mild traumatic brain injury case  
4 ascertainment using ICD-9 codes. *Acad Emerg Med* 2006;13:31-38.  
5  
6  
7 29. Cassidy JD, Boyle E, Carroll LJ. Population-based, inception cohort study of the  
8 incidence, course, and prognosis of mild traumatic brain injury after motor vehicle collisions.  
9  
10  
11  
12 *Arch Phys Med Rehabil* 2014;95:S278-S285.  
13  
14 30. Brennan JH, Bernard S, Cameron PA, et al. Ethanol and isolated traumatic brain injury.  
15  
16  
17 *J Clin Neurosci* 2015;22:1375-1381.  
18  
19 31. Luoto TM, Tenovuo O, Kataja A, et al. Who gets recruited in mild traumatic brain  
20 injury research? *J Neurotrauma* 2013;30:11-16.  
21  
22  
23 32. Sharpe S, Kool B, Shepherd M, et al. Mild traumatic brain injury: improving quality of  
24 care in the paediatric emergency department setting. *J Paediatr Child Health* 2012;48:170-176.  
25  
26  
27  
28  
29  
30  
31  
32  
33  
34  
35  
36  
37  
38  
39  
40  
41  
42  
43  
44  
45  
46  
47  
48  
49  
50  
51  
52  
53  
54  
55  
56  
57  
58  
59  
60

**Table 1.** Socio-demographic, injury-related and acute hospital management information of identified cases with a confirmed mTBI diagnosis (N=351) and indeterminate mTBI diagnosis (N=180) who presented to ED.

|                                                | Confirmed<br>mTBI<br>[WHO<br>criteria]<br>(N=351) | Indeterminate<br>mTBI<br>[Secondary<br>criteria]<br>(N=180) | Statistical<br>comparison<br><br>p value§ |
|------------------------------------------------|---------------------------------------------------|-------------------------------------------------------------|-------------------------------------------|
| <b>Socio-demographics</b>                      |                                                   |                                                             |                                           |
| <b>Age</b> (years), mean (SD)<br>[median, IQR] | 39.9 (14.2)<br>[40.8, 26.5-<br>52]                | 36.1 (13.1)<br>[34.7, 24.1-<br>44.5]                        | <0.01                                     |
| <b>Age groups</b> (years)                      |                                                   |                                                             |                                           |
| 18-24                                          | 71 (20.2)                                         | 52 (28.9)                                                   | 0.02                                      |
| 25-29                                          | 38 (10.8)                                         | 15 (8.3)                                                    | 0.36                                      |
| 30-34                                          | 36 (10.3)                                         | 26 (14.4)                                                   | 0.16                                      |
| 35-39                                          | 24 (6.8)                                          | 19 (10.6)                                                   | 0.13                                      |
| 40-44                                          | 44 (12.5)                                         | 24 (13.3)                                                   | 0.79                                      |
| 45-49                                          | 34 (9.7)                                          | 12 (6.7)                                                    | 0.24                                      |
| 50-54                                          | 44 (12.5)                                         | 9 (5)                                                       | <0.01                                     |
| 55-59                                          | 25 (7.1)                                          | 11 (6.1)                                                    | 0.66                                      |

|    |                                            |            |            |        |
|----|--------------------------------------------|------------|------------|--------|
| 1  |                                            |            |            |        |
| 2  |                                            |            |            |        |
| 3  | 60-65                                      | 35 (10)    | 12 (6.7)   | 0.21   |
| 4  |                                            |            |            |        |
| 5  | <b>Sex</b>                                 |            |            | <0.001 |
| 6  |                                            |            |            |        |
| 7  | Male                                       | 254 (72.4) | 90 (50)    |        |
| 8  |                                            |            |            |        |
| 9  | Female                                     | 97 (27.6)  | 90 (50)    |        |
| 10 |                                            |            |            |        |
| 11 |                                            |            |            |        |
| 12 | <b>Country of birth</b>                    |            |            | 0.50   |
| 13 |                                            |            |            |        |
| 14 | Australia                                  | 230 (65.5) | 113 (62.8) |        |
| 15 |                                            |            |            |        |
| 16 | Other                                      | 118 (33.6) | 66 (36.7)  |        |
| 17 |                                            |            |            |        |
| 18 |                                            |            |            |        |
| 19 | <b>Language spoken at home</b>             |            |            | 0.11   |
| 20 |                                            |            |            |        |
| 21 | English                                    | 334 (95.2) | 165 (91.7) |        |
| 22 |                                            |            |            |        |
| 23 | Other                                      | 17 (4.8)   | 15 (8.3)   |        |
| 24 |                                            |            |            |        |
| 25 |                                            |            |            |        |
| 26 | <b>Marital status</b>                      |            |            | 0.11   |
| 27 |                                            |            |            |        |
| 28 | Married/Defacto                            | 171 (48.7) | 83 (46.1)  |        |
| 29 |                                            |            |            |        |
| 30 | Other                                      | 180 (51.3) | 97 (53.9)  |        |
| 31 |                                            |            |            |        |
| 32 |                                            |            |            |        |
| 33 | <b>Mental health history<sup>+</sup></b>   | 61 (17.4)  | 23 (12.8)  | 0.17   |
| 34 |                                            |            |            |        |
| 35 | <b>Substance abuse history<sup>+</sup></b> | 36 (10.2)  | 1 (0.5)    |        |
| 36 |                                            |            |            |        |
| 37 |                                            |            |            |        |
| 38 | <b>Injury-related details</b>              |            |            |        |
| 39 |                                            |            |            |        |
| 40 | <b>mTBI WHO criteria</b>                   |            |            |        |
| 41 |                                            |            |            |        |
| 42 | Initial GCS at the scene/ED triage         |            |            |        |
| 43 |                                            |            |            |        |
| 44 | 15 points                                  | 232 (66.1) | 180 (100)  |        |
| 45 |                                            |            |            |        |
| 46 | 14 points                                  | 103 (29.2) | -          |        |
| 47 |                                            |            |            |        |
| 48 | 13 points                                  | 14 (4)     | -          |        |
| 49 |                                            |            |            |        |
| 50 | Missing                                    | 2 (0.57)   | -          |        |
| 51 |                                            |            |            |        |
| 52 | LOC ≤ 30 mins                              |            |            |        |
| 53 |                                            |            |            |        |
| 54 | No                                         | 71 (20.2)  | -          |        |
| 55 |                                            |            |            |        |
| 56 |                                            |            |            |        |
| 57 |                                            |            |            |        |
| 58 |                                            |            |            |        |
| 59 |                                            |            |            |        |
| 60 |                                            |            |            |        |

|                                         |            |            |        |
|-----------------------------------------|------------|------------|--------|
| Yes (witnessed/self-reported)           | 185 (52.7) | -          |        |
| Missing                                 | 50 (14.2)  | -          |        |
| <b>Amnesia &lt; 24 hours</b>            |            |            |        |
| No                                      | 40 (11.4)  | -          |        |
| Yes (observed/self-reported)            | 229 (65.2) | -          |        |
| Missing                                 | 78 (22.2)  | -          |        |
| Confusion/Disorientation                | 97 (27.6)  | -          |        |
| Intracranial injuries on head CT        | 31 (8.8)   | -          |        |
| <b>Multiple mTBI WHO criteria</b>       | 186 (53)   | -          |        |
| <b>mTBI Secondary criteria</b>          |            |            |        |
| Queried LOC                             | 45 (12.8)  | 12 (6.7)   | <0.05  |
| Queried amnesia                         | 4 (1.1)    | 3 (1.7)    | 0.564  |
| PTA testing w/ optimal scores           | 32 (9.1)   | 45 (25)    | <0.001 |
| Post-concussion symptoms #              | 183 (52.1) | 133 (73.9) | <0.001 |
| <i>Headache</i>                         | 149 (42.4) | 128 (71.1) |        |
| <i>Nausea/ Vomiting</i>                 | 103 (29.3) | 79 (43.9)  |        |
| <i>Dizziness</i>                        | 44 (12.5)  | 58 (32.2)  |        |
| <i>Fatigue</i>                          | 2 (0.6)    | 1 (0.6)    |        |
| <i>Memory problems</i>                  | 5 (1.4)    | 1 (0.6)    |        |
| <i>Concentration problems</i>           | 4 (1.1)    | 2 (1.1)    |        |
| <i>Other</i>                            | 81 (23.1)  | 78(43.3)   |        |
| Transient neurological abnormalities#   | 28 (8)     | 22 (12.2)  |        |
| <b>Multiple mTBI secondary criteria</b> | -          | 32 (17.8)  |        |
| <b>Injury Mechanism</b>                 |            |            | 0.35   |

|    |                                                |            |            |        |
|----|------------------------------------------------|------------|------------|--------|
| 1  |                                                |            |            |        |
| 2  |                                                |            |            |        |
| 3  | Fall                                           | 137 (39)   | 56 (31.1)  |        |
| 4  |                                                |            |            |        |
| 5  | Assault                                        | 27 (7.7)   | 14 (7.8)   |        |
| 6  |                                                |            |            |        |
| 7  | Work                                           | 9 (2.6)    | 7 (3.9)    |        |
| 8  |                                                |            |            |        |
| 9  |                                                |            |            |        |
| 10 | Sport                                          | 52 (14.8)  | 25 (13.9)  |        |
| 11 |                                                |            |            |        |
| 12 | Other                                          | 27 (7.7)   | 34 (18.9)  |        |
| 13 |                                                |            |            |        |
| 14 | Motor vehicle crash                            | 99 (28.2)  | 44 (24.4)  | <0.01  |
| 15 |                                                |            |            |        |
| 16 | <i>Driver</i>                                  | 28 (28.3)  | 15 (34.1)  |        |
| 17 |                                                |            |            |        |
| 18 | <i>Passenger</i>                               | 6 (6.1)    | 6 (13.6)   |        |
| 19 |                                                |            |            |        |
| 20 | <i>Motorbike rider</i>                         | 8 (8.1)    | 10 (22.7)  |        |
| 21 |                                                |            |            |        |
| 22 | <i>Bicyclist</i>                               | 44 (44.4)  | 5 (11.4)   |        |
| 23 |                                                |            |            |        |
| 24 | <i>Pedestrian</i>                              | 10 (10.1)  | 5 (11.4)   |        |
| 25 |                                                |            |            |        |
| 26 | <i>Other</i>                                   | 3 (3)      | 3 (6.8)    |        |
| 27 |                                                |            |            |        |
| 28 |                                                |            |            |        |
| 29 |                                                |            |            |        |
| 30 | <b>Reported impact to the head</b>             |            |            | <0.001 |
| 31 |                                                |            |            |        |
| 32 | No                                             | 2 (0.6)    | 1 (0.5)    |        |
| 33 |                                                |            |            |        |
| 34 | Yes                                            | 269 (76.6) | 164 (91.1) |        |
| 35 |                                                |            |            |        |
| 36 | Missing                                        | 80 (22.8)  | 15 (8.3)   |        |
| 37 |                                                |            |            |        |
| 38 |                                                |            |            |        |
| 39 |                                                |            |            |        |
| 40 | <b>Associated injury types†</b>                |            |            |        |
| 41 |                                                |            |            |        |
| 42 | Soft tissue laceration                         | 165 (47)   | 55 (30.6)  | <0.001 |
| 43 |                                                |            |            |        |
| 44 | Fracture                                       | 87 (24.8)  | 24 (13.3)  | <0.01  |
| 45 |                                                |            |            |        |
| 46 | Ligamentous                                    | 2 (0.6)    | 2 (1.1)    | 0.49   |
| 47 |                                                |            |            |        |
| 48 | Dislocation                                    | 3 (0.8)    | 0          | 0.21   |
| 49 |                                                |            |            |        |
| 50 | Abrasion, superficial wound, contusion         | 158 (45)   | 83 (46.1)  | 0.81   |
| 51 |                                                |            |            |        |
| 52 |                                                |            |            |        |
| 53 | <b>Multiple injury types</b>                   | 105 (29.9) | 29 (16.1)  |        |
| 54 |                                                |            |            |        |
| 55 | <b>Alcohol/drug use at the time of injury†</b> | 127 (36.2) | 19 (10.6)  | <0.001 |
| 56 |                                                |            |            |        |
| 57 |                                                |            |            |        |
| 58 |                                                |            |            |        |
| 59 |                                                |            |            |        |
| 60 |                                                |            |            |        |

| <b>ED management details</b>                        |               |               |        |
|-----------------------------------------------------|---------------|---------------|--------|
| <b>ED arrival mode</b>                              |               |               | <0.001 |
| By ambulance                                        | 250 (71.2)    | 56 (31.1)     |        |
| Other                                               | 101 (28.8)    | 124 (68.9)    |        |
| <b>Triage category</b>                              |               |               | <0.001 |
| 1. See immediately                                  | 24 (6.8)      | 4 (2.2)       |        |
| 2. Within 10 minutes                                | 170 (48.4)    | 42 (23.3)     |        |
| 3. Within 30 minutes                                | 116 (33.1)    | 64 (35.6)     |        |
| 4. Within 1 hour                                    | 40 (11.4)     | 69 (38.3)     |        |
| 5. Within 2 hours                                   | 1 (0.3)       | 1 (0.6)       |        |
| <b>Intubation<sup>†</sup></b>                       | 1 (0.3)       | 0             | 0.47   |
| <b>ICU admission<sup>†</sup></b>                    | 7 (2)         | 1 (0.6)       | 0.19   |
| <b>Length of ED stay (hrs), median (IQR)</b>        | 5.8 (4-8.6)   | 3.8 (2.6-5.7) | <0.001 |
| <b>Length of hospital stay (days), median (IQR)</b> | 3.4 (1.9-6.5) | 2 (0.9-7.9)   |        |
| <b>Discharge destination</b>                        |               |               | <0.001 |
| Discharged home                                     | 133 (37.9)    | 127 (70.6)    |        |
| Admitted to ED                                      | 121 (34.5)    | 36 (20)       |        |
| Admitted to ward                                    | 97 (27.6)     | 17 (9.4)      |        |
| <b>Location of initial GCS<sup>†</sup></b>          |               |               | <0.001 |
| At the scene 30-min post-injury                     | 216 (61.5)    | 52 (28.9)     |        |
| At ED presentation                                  | 130 (37)      | 127 (70.6)    |        |
| <b>Brain CT performed<sup>†</sup></b>               | 266 (75.8)    | 73 (40.6)     | <0.001 |
| <b>PTA measured<sup>†</sup></b>                     | 182 (51.9)    | 46 (25.6)     | <0.001 |

|                                                  |                |               |        |
|--------------------------------------------------|----------------|---------------|--------|
| A-WPTAS                                          | 169 (92.8)     | 44 (95.6)     |        |
| WPTAS                                            | 19 (10.4)      | 2 (4.4)       |        |
| <b>Location of PTA testing</b>                   | <i>(N=182)</i> | <i>(N=46)</i> |        |
| In ED                                            | 166 (91.2)     | 44 (95.6)     | 0.364  |
| In ward                                          | 28 (15.4)      | 2 (4.4)       | <0.05  |
| <b>Time to PTA testing (hrs), median (IQR)</b>   | 3.7 (2.3-6.1)  | 2.5 (1.7-4.9) | <0.05  |
| <b>PTA classification based on PTA testing</b>   | <i>(N=182)</i> | <i>(N=46)</i> | <0.001 |
| Optimal scores/Did not fail                      | 32 (17.8)      | 40 (87)       |        |
| 6-30 minutes                                     | 2 (1.1)        | -             |        |
| 31-60 minutes                                    | 1 (0.1)        | -             |        |
| >1-12 hours                                      | 106 (58.4)     | -             |        |
| >12-24 hours                                     | 4 (2.2)        | -             |        |
| Unknown/incomplete/missing                       | 37 (20.4)      | 6 (13)        |        |
| <b>Head Injury advice given†</b>                 | 166 (47.3)     | 120 (66.7)    | <0.001 |
| <b>Follow-up recommendations</b>                 | 128 (36.5)     | 43 (23.9)     | <0.01  |
| <b>Representations to ED (within 1 mth)</b>      | 13 (3.7)       | 8 (4.4)       |        |
| <b>Recorded mTBI diagnosis in the ED records</b> |                |               | 0.47   |
| No                                               | 269 (76.9)     | 146 (81.1)    |        |
| Yes                                              | 81 (23.1)      | 34 (18.9)     |        |

TBI: Traumatic brain injury; WHO: World Health Organization; GCS: Glasgow Coma Scale;

ED: Emergency department; ICU: Intensive care unit; LOC: Loss of consciousness; PTA: Post-

traumatic amnesia; A-WPTAS: Abbreviated Westmead Post Traumatic-Amnesia Scale;

WPTAS: Westmead Post-Traumatic Amnesia.

1  
2  
3 † Proportion of valid cases.  
4

5 §  $\chi^2$ , z-test, t-test.  
6  
7  
8  
9

10 Note: The data contains occasional missing data values, which are assumed to be random.  
11  
12  
13  
14  
15  
16  
17  
18  
19  
20  
21  
22  
23  
24  
25  
26  
27  
28  
29  
30  
31  
32  
33  
34  
35  
36  
37  
38  
39  
40  
41  
42  
43  
44  
45  
46  
47  
48  
49  
50  
51  
52  
53  
54  
55  
56  
57  
58  
59  
60

For peer review only



**Table 2.** WHO criteria distribution among the identified cohort of confirmed mTBI cases (N=351).

| <b>GCS</b>     | <b>LOC</b>       | <b>Amnesia</b>     | <b>Confusion/<br/>disorientation</b> | <b>Intracranial<br/>injuries</b> | <b>N</b>       | <b>%</b> |
|----------------|------------------|--------------------|--------------------------------------|----------------------------------|----------------|----------|
| <b>=13-14</b>  | <b>≤ 30 mins</b> | <b>&lt; 24 hrs</b> |                                      |                                  |                |          |
| <b>(N=117)</b> | <b>(N=185)</b>   | <b>(N=229)</b>     | <b>(N=97)</b>                        | <b>(N=31)</b>                    | <b>(N=351)</b> |          |
| ✓              | ✓                | ✓                  | ✓                                    | ✓                                | 2              | 0.9      |
| ✓              | ✓                | ✓                  | ✓                                    |                                  | 18             | 5.1      |
| ✓              | ✓                | ✓                  |                                      | ✓                                | 5              | 1.4      |
| ✓              | ✓                | ✓                  |                                      |                                  | 10             | 2.8      |
| ✓              | ✓                |                    | ✓                                    |                                  | 6              | 1.7      |
| ✓              | ✓                |                    |                                      |                                  | 6              | 1.7      |
| ✓              |                  | ✓                  | ✓                                    | ✓                                | 4              | 1.1      |
| ✓              |                  | ✓                  | ✓                                    |                                  | 32             | 9.1      |
| ✓              |                  | ✓                  |                                      | ✓                                | 2              | 0.6      |
| ✓              |                  | ✓                  |                                      |                                  | 17             | 4.8      |
| ✓              |                  |                    | ✓                                    |                                  | 2              | 0.6      |
| ✓              |                  |                    |                                      |                                  | 13             | 3.7      |
|                | ✓                | ✓                  | ✓                                    | ✓                                | 1              | 0.3      |
|                | ✓                | ✓                  | ✓                                    |                                  | 9              | 2.6      |
|                | ✓                | ✓                  |                                      | ✓                                | 1              | 0.3      |
|                | ✓                | ✓                  |                                      |                                  | 51             | 14.4     |
|                | ✓                |                    | ✓                                    | ✓                                | 1              | 0.3      |
|                | ✓                |                    | ✓                                    |                                  | 4              | 1.1      |

1  
2  
3  
4  
5  
6  
7  
8  
9  
10  
11  
12  
13  
14  
15  
16  
17  
18  
19  
20  
21  
22  
23  
24  
25  
26  
27  
28  
29  
30  
31  
32  
33  
34  
35  
36  
37  
38  
39  
40  
41  
42  
43  
44  
45  
46  
47  
48  
49  
50  
51  
52  
53  
54  
55  
56  
57  
58  
59  
60

|   |   |   |   |   |    |      |
|---|---|---|---|---|----|------|
| ✓ |   |   |   | ✓ | 3  | 0.8  |
| ✓ |   |   |   |   | 68 | 19.4 |
|   | ✓ | ✓ |   | ✓ | 1  | 0.3  |
|   | ✓ |   | ✓ |   | 8  | 2.3  |
|   | ✓ |   |   | ✓ | 2  | 0.6  |
|   | ✓ |   |   |   | 66 | 18.7 |
|   |   |   | ✓ |   | 10 | 2.8  |
|   |   |   |   | ✓ | 9  | 2.6  |

---

WHO: World Health Organization; TBI: Traumatic brain injury; GCS: Glasgow Coma Scale;

LOC: Loss of consciousness.

For peer review only

**Table 3.** Confirmed mTBI patients (N=351) with documented PTA (N=260) based on the summary PTA-related mTBI designation, accounting for any documented PTA manifestations: observed/self-reported amnesia or confusion/disorientation fulfilling the WHO criteria, behavioural change or acute cognitive impairment on PTA testing.

| Summary                              | Observed/self-reported                  | Observed/self-reported                         | Observed Behavioural changes | PTA testing administered | N       | %    |
|--------------------------------------|-----------------------------------------|------------------------------------------------|------------------------------|--------------------------|---------|------|
| PTA-related mTBI designation (N=260) | Amnesia < 24 hrs [WHO criteria] (N=229) | Confusion/disorientation [WHO criteria] (N=97) | (N=61)                       | (N=182)                  | (N=351) |      |
| ✓                                    | ✓                                       | ✓                                              | ✓                            | ✓                        | 27      | 7.7  |
| ✓                                    | ✓                                       | ✓                                              | ✓                            | -                        | 6       | 1.7  |
| ✓                                    | ✓                                       | ✓                                              | -                            | ✓                        | 24      | 6.8  |
| ✓                                    | ✓                                       | ✓                                              | -                            | -                        | 18      | 5.1  |
| ✓                                    | ✓                                       | -                                              | ✓                            | ✓                        | 16      | 4.6  |
| ✓                                    | ✓                                       | -                                              | ✓                            | -                        | 6       | 1.7  |
| ✓                                    | ✓                                       | -                                              | -                            | ✓                        | 75      | 21.4 |
| ✓                                    | ✓                                       | -                                              | -                            | -                        | 57      | 16.2 |
| ✓                                    | -                                       | ✓                                              | ✓                            | ✓                        | 4       | 1.1  |
| ✓                                    | -                                       | ✓                                              | -                            | ✓                        | 6       | 1.7  |

|    |   |   |   |   |    |                |            |
|----|---|---|---|---|----|----------------|------------|
| 1  |   |   |   |   |    |                |            |
| 2  |   |   |   |   |    |                |            |
| 3  | ✓ | - | ✓ | - |    | 12             | 3.4        |
| 4  |   |   |   |   |    |                |            |
| 5  | ✓ | - | - | ✓ | ✓  | <b>1</b>       | <b>0.3</b> |
| 6  |   |   |   |   |    |                |            |
| 7  | ✓ | - | - | ✓ |    | 1 <sup>^</sup> | <b>0.3</b> |
| 8  |   |   |   |   |    |                |            |
| 9  |   |   |   |   |    |                |            |
| 10 | ✓ | - | - | - | ✓  | 7              | <b>2</b>   |
| 11 |   |   |   |   |    |                |            |
| 12 | - | - | - | - | ✓§ | 20#            | 5.8        |
| 13 |   |   |   |   |    |                |            |
| 14 | - | - | - | - | -  | 71#            | 20.        |
| 15 |   |   |   |   |    |                |            |
| 16 |   |   |   |   |    |                |            |
| 17 |   |   |   |   |    |                | 2          |
| 18 |   |   |   |   |    |                |            |

---

TBI: Traumatic brain injury; WHO: World Health Organization; PTA: Post-traumatic amnesia

Note: in **bold** are confirmed mTBI (N=9) based only on reported behavioural changes and/or cognitive impairment at PTA testing (i.e. PTA documented). All, except one (<sup>^</sup>), met other mTBI WHO criteria (i.e. LOC ≤ 30 mins, GCS=13-14, intracranial injuries).

# Confirmed mTBI (N=91) with no documented positive findings for PTA manifestations.

§ Individuals who were tested for PTA and obtained optimal scores (i.e. not in PTA), in the absence of PTA manifestations documented in other sources.

**Table 4.** Top 25 ED diagnosis codes (SNOWMED codes) and ED diagnosis codes indicative of mTBI, for the overall mTBI cohort (confirmed mTBI cases, N=351; indeterminate mTBI, N=180)

| Top 25 ED Diagnosis Codes Description                 | N   | %    |
|-------------------------------------------------------|-----|------|
| Injury of head (disorder)                             | 145 | 26.3 |
| Motor vehicle accident victim (finding)               | 49  | 8.9  |
| Minor head injury (disorder)                          | 39  | 7.1  |
| Traumatic injury (disorder)                           | 37  | 6.7  |
| Falls (finding)                                       | 35  | 6.4  |
| Concussion (disorder)                                 | 26  | 4.7  |
| Headache (finding)                                    | 11  | 2.0  |
| Facial laceration (disorder)                          | 10  | 1.8  |
| Victim of physical assault (finding)                  | 9   | 1.6  |
| Alcohol intoxication (disorder)                       | 8   | 1.5  |
| Falling injury (finding)                              | 8   | 1.5  |
| Fractured nasal bones (disorder)                      | 8   | 1.5  |
| Laceration of head (disorder)                         | 8   | 1.5  |
| Post-concussion syndrome (disorder)                   | 7   | 1.3  |
| Injury of face (disorder)                             | 6   | 1.1  |
| Subarachnoid haemorrhage (disorder)                   | 6   | 1.1  |
| Neck pain (finding)                                   | 5   | 0.9  |
| Backache                                              | 4   | 0.7  |
| Intracranial injury without skull fracture (disorder) | 4   | 0.7  |

|                                                               |          |          |
|---------------------------------------------------------------|----------|----------|
| Laceration of forehead (disorder)                             | 4        | 0.7      |
| Closed fracture of clavicle (disorder)                        | 3        | 0.5      |
| Dizziness (finding)                                           | 3        | 0.5      |
| Fracture of maxilla (disorder)                                | 3        | 0.5      |
| Fracture of rib (disorder)                                    | 3        | 0.5      |
| Injury of neck (disorder)                                     | 3        | 0.5      |
| <b>ED Diagnosis Codes indicative of mTBI</b>                  | <b>N</b> | <b>%</b> |
| Concussion (disorder)                                         | 26       | 4.7      |
| Post-concussion syndrome (disorder)                           | 7        | 1.3      |
| Subarachnoid haemorrhage (disorder)                           | 6        | 1.1      |
| Intracranial injury without skull fracture (disorder)         | 4        | 0.7      |
| Subdural hematoma (disorder)                                  | 3        | 0.5      |
| Brief loss of consciousness (finding)                         | 2        | 0.4      |
| Cerebral haemorrhage (disorder)                               | 1        | 0.2      |
| Contusion of cerebrum (disorder)                              | 1        | 0.2      |
| Crushing injury of skull and intracranial contents (disorder) | 1        | 0.2      |
| Epidural haemorrhage (disorder)                               | 1        | 0.2      |
| Intracranial haemorrhage (disorder)                           | 1        | 0.2      |
| Loss of consciousness (finding)                               | 1        | 0.2      |
| Transient global amnesia (finding)                            | 1        | 0.2      |
| Traumatic subdural haemorrhage (disorder)                     | 1        | 0.2      |

## FIGURE LEGENDS

**Figure 1.** Study recruitment flowchart.

## LIST OF SUPPLEMENTAL DIGITAL CONTENT

Supplemental Material Content 1, (Table S1). Full list of ED diagnosis codes (SNOWMED codes) and ED diagnosis codes indicative of mTBI, for the overall mTBI cohort (confirmed mTBI cases, N=351; indeterminate mTBI, N=180).

Supplemental Material Content 2, (Table S2). Significant differences ( $p < .05$ ) between people with and without recorded mTBI diagnosis in Emergency Department (ED) records and/or ED discharge codes indicative of mild traumatic brain injury (mTBI), among confirmed mTBI cases (N=351).

Supplemental Material Content 3, (Table S3). Significant differences ( $p < .05$ ) between people tested for Post-traumatic Amnesia (PTA) versus those not tested, among confirmed mild traumatic brain injury (mTBI) (N=351) and indeterminate cases (N=180).

Supplemental Material Content 4, (Figure S1). Percent of screened ED presentations aged 18-65 years with confirmed or indeterminate mTBI (total 30 479 screened, 351 confirmed mTBI (1.15%), 180 indeterminate mTBI (0.6%)).

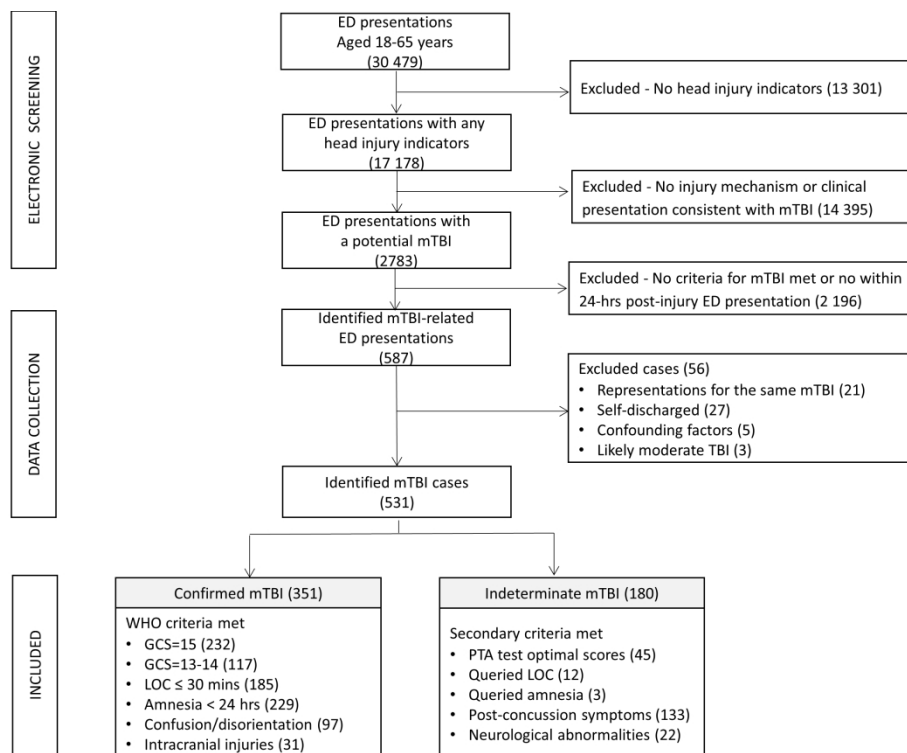

Figure 1. Study recruitment flowchart.

254x190mm (300 x 300 DPI)



**Table S1.** Full list of ED diagnosis codes (SNOWMED codes) and ED diagnosis codes indicative of mTBI, for the overall mTBI cohort (confirmed mTBI cases, N=351; indeterminate mTBI, N=180).

| SNOWMED Codes | Diagnosis Description                                 | N   | %    |
|---------------|-------------------------------------------------------|-----|------|
|               | Injury of head (disorder)                             | 145 | 26.3 |
|               | Motor vehicle accident victim (finding)               | 49  | 8.9  |
|               | Minor head injury (disorder)                          | 39  | 7.1  |
|               | Traumatic injury (disorder)                           | 37  | 6.7  |
|               | Falls (finding)                                       | 35  | 6.4  |
|               | Concussion (disorder)                                 | 26  | 4.7  |
|               | Headache (finding)                                    | 11  | 2.0  |
|               | Facial laceration (disorder)                          | 10  | 1.8  |
|               | Victim of physical assault (finding)                  | 9   | 1.6  |
|               | Alcohol intoxication (disorder)                       | 8   | 1.5  |
|               | Falling injury (finding)                              | 8   | 1.5  |
|               | Fractured nasal bones (disorder)                      | 8   | 1.5  |
|               | Laceration of head (disorder)                         | 8   | 1.5  |
|               | Postconcussion syndrome (disorder)                    | 7   | 1.3  |
|               | Injury of face (disorder)                             | 6   | 1.1  |
|               | Subarachnoid hemorrhage (disorder)                    | 6   | 1.1  |
|               | Neck pain (finding)                                   | 5   | 0.9  |
|               | Backache                                              | 4   | 0.7  |
|               | Intracranial injury without skull fracture (disorder) | 4   | 0.7  |
|               | Laceration of forehead (disorder)                     | 4   | 0.7  |
|               | Closed fracture of clavicle (disorder)                | 3   | 0.5  |

|    |                                                                    |   |     |
|----|--------------------------------------------------------------------|---|-----|
| 1  |                                                                    |   |     |
| 2  |                                                                    |   |     |
| 3  | Dizziness (finding)                                                | 3 | 0.5 |
| 4  |                                                                    |   |     |
| 5  | Fracture of maxilla (disorder)                                     | 3 | 0.5 |
| 6  |                                                                    |   |     |
| 7  | Fracture of rib (disorder)                                         | 3 | 0.5 |
| 8  |                                                                    |   |     |
| 9  |                                                                    |   |     |
| 10 | Injury of neck (disorder)                                          | 3 | 0.5 |
| 11 |                                                                    |   |     |
| 12 | Laceration - injury (disorder)                                     | 3 | 0.5 |
| 13 |                                                                    |   |     |
| 14 | Soft tissue injury (disorder)                                      | 3 | 0.5 |
| 15 |                                                                    |   |     |
| 16 |                                                                    |   |     |
| 17 | Subdural hematoma (disorder)                                       | 3 | 0.5 |
| 18 |                                                                    |   |     |
| 19 | -                                                                  | 2 | 0.4 |
| 20 |                                                                    |   |     |
| 21 | Abrasion of face (disorder)                                        | 2 | 0.4 |
| 22 |                                                                    |   |     |
| 23 | Abrasion of head (disorder)                                        | 2 | 0.4 |
| 24 |                                                                    |   |     |
| 25 |                                                                    |   |     |
| 26 | Alcohol abuse (disorder)                                           | 2 | 0.4 |
| 27 |                                                                    |   |     |
| 28 | Brief loss of consciousness (finding)                              | 2 | 0.4 |
| 29 |                                                                    |   |     |
| 30 |                                                                    |   |     |
| 31 | Closed fracture of facial bone (disorder)                          | 2 | 0.4 |
| 32 |                                                                    |   |     |
| 33 | Fracture of cervical spine (disorder)                              | 2 | 0.4 |
| 34 |                                                                    |   |     |
| 35 | Fracture of face bones (disorder)                                  | 2 | 0.4 |
| 36 |                                                                    |   |     |
| 37 | Fracture of phalanx of finger (disorder)                           | 2 | 0.4 |
| 38 |                                                                    |   |     |
| 39 |                                                                    |   |     |
| 40 | Fracture of vertebral column without spinal cord injury (disorder) | 2 | 0.4 |
| 41 |                                                                    |   |     |
| 42 | Hematoma of face (disorder)                                        | 2 | 0.4 |
| 43 |                                                                    |   |     |
| 44 | Laceration of lip (disorder)                                       | 2 | 0.4 |
| 45 |                                                                    |   |     |
| 46 |                                                                    |   |     |
| 47 | Motor vehicle accident passenger (finding)                         | 2 | 0.4 |
| 48 |                                                                    |   |     |
| 49 | Scalp laceration (disorder)                                        | 2 | 0.4 |
| 50 |                                                                    |   |     |
| 51 | Superficial laceration of face (disorder)                          | 2 | 0.4 |
| 52 |                                                                    |   |     |
| 53 |                                                                    |   |     |
| 54 | Blunt injury (disorder)                                            | 1 | 0.2 |
| 55 |                                                                    |   |     |
| 56 | Cerebral hemorrhage (disorder)                                     | 1 | 0.2 |
| 57 |                                                                    |   |     |
| 58 | Closed fracture carpal bone (disorder)                             | 1 | 0.2 |
| 59 |                                                                    |   |     |
| 60 |                                                                    |   |     |

|    |                                                               |   |     |
|----|---------------------------------------------------------------|---|-----|
| 1  |                                                               |   |     |
| 2  |                                                               |   |     |
| 3  | Closed fracture of base of skull (disorder)                   | 1 | 0.2 |
| 4  |                                                               |   |     |
| 5  | Closed fracture of multiple ribs (disorder)                   | 1 | 0.2 |
| 6  |                                                               |   |     |
| 7  | Closed fracture of of navicular bone of wrist (disorder)      | 1 | 0.2 |
| 8  |                                                               |   |     |
| 9  |                                                               |   |     |
| 10 | Closed fracture of one or more phalanges of hand (disorder)   | 1 | 0.2 |
| 11 |                                                               |   |     |
| 12 | Closed fracture of orbital floor (blow-out) (disorder)        | 1 | 0.2 |
| 13 |                                                               |   |     |
| 14 | Closed fracture of rib (disorder)                             | 1 | 0.2 |
| 15 |                                                               |   |     |
| 16 |                                                               |   |     |
| 17 | Closed fracture of shaft of fibula (disorder)                 | 1 | 0.2 |
| 18 |                                                               |   |     |
| 19 | Closed fracture of upper end of tibia (disorder)              | 1 | 0.2 |
| 20 |                                                               |   |     |
| 21 |                                                               |   |     |
| 22 | Compression fracture of vertebral column (disorder)           | 1 | 0.2 |
| 23 |                                                               |   |     |
| 24 | Contusion (disorder)                                          | 1 | 0.2 |
| 25 |                                                               |   |     |
| 26 | Contusion of cerebrum (disorder)                              | 1 | 0.2 |
| 27 |                                                               |   |     |
| 28 | Contusion of shoulder region (disorder)                       | 1 | 0.2 |
| 29 |                                                               |   |     |
| 30 |                                                               |   |     |
| 31 | Crushing injury of skull and intracranial contents (disorder) | 1 | 0.2 |
| 32 |                                                               |   |     |
| 33 | Did not wait for treatment (finding)                          | 1 | 0.2 |
| 34 |                                                               |   |     |
| 35 | Elbow fracture (disorder)                                     | 1 | 0.2 |
| 36 |                                                               |   |     |
| 37 |                                                               |   |     |
| 38 | Epidural hemorrhage (disorder)                                | 1 | 0.2 |
| 39 |                                                               |   |     |
| 40 | Finding related to falls (finding)                            | 1 | 0.2 |
| 41 |                                                               |   |     |
| 42 | Floaters in visual field (finding)                            | 1 | 0.2 |
| 43 |                                                               |   |     |
| 44 |                                                               |   |     |
| 45 | Foot swelling (finding)                                       | 1 | 0.2 |
| 46 |                                                               |   |     |
| 47 | Fracture of distal end of radius (disorder)                   | 1 | 0.2 |
| 48 |                                                               |   |     |
| 49 | Fracture of lumbar spine (disorder)                           | 1 | 0.2 |
| 50 |                                                               |   |     |
| 51 | Fracture of mandible closed (disorder)                        | 1 | 0.2 |
| 52 |                                                               |   |     |
| 53 |                                                               |   |     |
| 54 | Fracture of multiple ribs (disorder)                          | 1 | 0.2 |
| 55 |                                                               |   |     |
| 56 | Fracture of orbit (disorder)                                  | 1 | 0.2 |
| 57 |                                                               |   |     |
| 58 | Fracture of orbital roof (disorder)                           | 1 | 0.2 |
| 59 |                                                               |   |     |
| 60 |                                                               |   |     |

|    |                                              |   |     |
|----|----------------------------------------------|---|-----|
| 1  |                                              |   |     |
| 2  |                                              |   |     |
| 3  | Fracture of pelvis (disorder)                | 1 | 0.2 |
| 4  |                                              |   |     |
| 5  | Fracture of pubis (disorder)                 | 1 | 0.2 |
| 6  |                                              |   |     |
| 7  | Fracture of skull (disorder)                 | 1 | 0.2 |
| 8  |                                              |   |     |
| 9  | Fracture of sternum (disorder)               | 1 | 0.2 |
| 10 |                                              |   |     |
| 11 | Fracture of thoracic spine (disorder)        | 1 | 0.2 |
| 12 |                                              |   |     |
| 13 | Fracture of upper jaw closed (disorder)      | 1 | 0.2 |
| 14 |                                              |   |     |
| 15 | Fracture of vertebral column (disorder)      | 1 | 0.2 |
| 16 |                                              |   |     |
| 17 | Hematoma (disorder)                          | 1 | 0.2 |
| 18 |                                              |   |     |
| 19 | Injury of facial nerve (disorder)            | 1 | 0.2 |
| 20 |                                              |   |     |
| 21 | Injury of kidney (disorder)                  | 1 | 0.2 |
| 22 |                                              |   |     |
| 23 | Injury of pancreas (disorder)                | 1 | 0.2 |
| 24 |                                              |   |     |
| 25 | Injury of shoulder region (disorder)         | 1 | 0.2 |
| 26 |                                              |   |     |
| 27 | Intervertebral disc prolapse (disorder)      | 1 | 0.2 |
| 28 |                                              |   |     |
| 29 | Intracranial hemorrhage (disorder)           | 1 | 0.2 |
| 30 |                                              |   |     |
| 31 | Laceration of eye region (disorder)          | 1 | 0.2 |
| 32 |                                              |   |     |
| 33 | Loss of consciousness (finding)              | 1 | 0.2 |
| 34 |                                              |   |     |
| 35 | Migraine (disorder)                          | 1 | 0.2 |
| 36 |                                              |   |     |
| 37 | Motor vehicle accident driver (finding)      | 1 | 0.2 |
| 38 |                                              |   |     |
| 39 | Multiple fractures (disorder)                | 1 | 0.2 |
| 40 |                                              |   |     |
| 41 | Muscle strain (disorder)                     | 1 | 0.2 |
| 42 |                                              |   |     |
| 43 | Neck sprain (disorder)                       | 1 | 0.2 |
| 44 |                                              |   |     |
| 45 | Open fracture of nasal bones (disorder)      | 1 | 0.2 |
| 46 |                                              |   |     |
| 47 | Open fracture of patella (disorder)          | 1 | 0.2 |
| 48 |                                              |   |     |
| 49 | Open fracture of tibia AND fibula (disorder) | 1 | 0.2 |
| 50 |                                              |   |     |
| 51 | Open wound of lower leg (disorder)           | 1 | 0.2 |
| 52 |                                              |   |     |
| 53 |                                              |   |     |
| 54 |                                              |   |     |
| 55 |                                              |   |     |
| 56 |                                              |   |     |
| 57 |                                              |   |     |
| 58 |                                              |   |     |
| 59 |                                              |   |     |
| 60 |                                              |   |     |

1  
2  
3  
4  
5  
6  
7  
8  
9  
10  
11  
12  
13  
14  
15  
16  
17  
18  
19  
20  
21  
22  
23  
24  
25  
26  
27  
28  
29  
30  
31  
32  
33  
34  
35  
36  
37  
38  
39  
40  
41  
42  
43  
44  
45  
46  
47  
48  
49  
50  
51  
52  
53  
54  
55  
56  
57  
58  
59  
60

|                                                   |   |     |
|---------------------------------------------------|---|-----|
| Pins and needles (finding)                        | 1 | 0.2 |
| Recurrent falls (finding)                         | 1 | 0.2 |
| Shoulder pain (finding)                           | 1 | 0.2 |
| Sprain of wrist (disorder)                        | 1 | 0.2 |
| Strain of neck muscle (disorder)                  | 1 | 0.2 |
| Superficial injury of face (disorder)             | 1 | 0.2 |
| Superficial injury of head (disorder)             | 1 | 0.2 |
| Syncope (disorder)                                | 1 | 0.2 |
| Transient global amnesia (finding)                | 1 | 0.2 |
| Traumatic dislocation of clavicle (disorder)      | 1 | 0.2 |
| Traumatic subdural hemorrhage (disorder)          | 1 | 0.2 |
| Unexplained falls (finding)                       | 1 | 0.2 |
| Victim of trauma with multiple injuries (finding) | 1 | 0.2 |
| Vomiting (disorder)                               | 1 | 0.2 |
| Wound discharge (finding)                         | 1 | 0.2 |

---

**Table S2.** Significant differences ( $p < .05$ ) between people with and without recorded mTBI diagnosis in Emergency Department (ED) records and/or ED discharge codes indicative of mild traumatic brain injury (mTBI), among confirmed mTBI cases ( $N=351$ ).

| <b>Confirmed mTBI cases (N=351)</b> |                                                                      |                                                                  |                                                      |                                                                                    |                                                                                    |                                                      |
|-------------------------------------|----------------------------------------------------------------------|------------------------------------------------------------------|------------------------------------------------------|------------------------------------------------------------------------------------|------------------------------------------------------------------------------------|------------------------------------------------------|
|                                     | <b>Cases<br/>with no<br/>recorded mTBI<br/>diagnosis<br/>(N=269)</b> | <b>Cases<br/>with recorded<br/>mTBI<br/>diagnosis<br/>(N=81)</b> | <b>Statistical<br/>comparison<br/><br/>p values§</b> | <b>Cases<br/>with no ED<br/>discharge codes<br/>indicative of mTBI<br/>(N=314)</b> | <b>Cases<br/>with ED<br/>discharge codes<br/>indicative of<br/>mTBI<br/>(N=37)</b> | <b>Statistical<br/>comparison<br/><br/>p values§</b> |
| Non-traffic-related injury          | 186 (69.1)                                                           | 66 (81.5)                                                        | 0.03                                                 | 93 (30.6)                                                                          | 3 (8.1)                                                                            | 0.004                                                |
| Discharge destination               |                                                                      |                                                                  | 0.0005                                               |                                                                                    |                                                                                    | 0.01                                                 |
| Discharged home                     | 104 (38.7)                                                           | 29 (35.8)                                                        |                                                      | 119 (37.9)                                                                         | 14 (37.8)                                                                          |                                                      |

1  
2  
3  
4  
5  
6  
7  
8  
9  
10  
11  
12  
13  
14  
15  
16  
17  
18  
19  
20  
21  
22  
23  
24  
25  
26  
27  
28  
29  
30  
31  
32  
33  
34  
35  
36  
37  
38  
39  
40  
41  
42  
43  
44  
45  
46

|                                           |            |           |         |            |           |         |
|-------------------------------------------|------------|-----------|---------|------------|-----------|---------|
| Admitted to ED                            | 104 (38.7) | 17 (21)   |         | 115 (36.6) | 6 (16.2)  |         |
| Admitted to ward                          | 61 (22.7)  | 35 (43.2) |         | 80 (25.5)  | 17 (46)   |         |
| Intracranial injuries on head CT          | 4 (2)      | 26 (42.6) | <0.0001 | 16 (6.7)   | 14 (50)   | <0.0001 |
| Headache                                  | 103 (38.3) | 46 (56.8) | 0.009   | 127 (40.5) | 22 (59.5) | 0.03    |
| Concentration problems                    | 0 (0)      | 4 (4.9)   | 0.001   | 2 (0.6)    | 2 (5.4)   | 0.01    |
| Follow-up recommendations                 | 83 (30.9)  | 44 (54.3) | 0.0003  | 106 (33.8) | 22 (59.5) | 0.002   |
| PTA measured                              | 125 (46.5) | 56 (69.1) | 0.0003  | -          | -         | -       |
| Recorded mTBI diagnosis in the ED records | -          | -         | -       | 85 (27.1)  | 16 (43.2) | 0.04    |

§  $\chi^2$ , z-test, t-test.

**Table S3.** Significant differences ( $p < .05$ ) between people tested for Post-traumatic Amnesia (PTA) versus those not tested, among confirmed mild traumatic brain injury (mTBI) (N=351) and indeterminate cases (N=180).

|                                | Confirmed mTBI cases (N=351)                       |                                                |                           | Indeterminate mTBI cases (N=180)                       |                                                   |                           |
|--------------------------------|----------------------------------------------------|------------------------------------------------|---------------------------|--------------------------------------------------------|---------------------------------------------------|---------------------------|
|                                | Confirmed<br>mTBI not<br>tested for PTA<br>(N=169) | Confirmed<br>mTBI tested<br>for PTA<br>(N=182) | Statistical<br>comparison | Indeterminate<br>mTBI not tested<br>for PTA<br>(N=134) | Indeterminate<br>mTBI tested for<br>PTA<br>(N=46) | Statistical<br>comparison |
|                                | N (%)                                              | N (%)                                          | p value§                  | N (%)                                                  | N (%)                                             | p value§                  |
| Transported to ED by ambulance | 108 (63.9)                                         | 142 (78)                                       | 0.004                     | 30 (22.4)                                              | 26 (56.5)                                         | <0.0001                   |
| Traffic-related injury         | 32 (18.9)                                          | 67 (36.8)                                      | 0.0002                    | 23 (17.2)                                              | 21 (45.7)                                         | 0.0001                    |
| Discharge destination          |                                                    |                                                | <0.0001                   |                                                        |                                                   | <0.0001                   |
| Discharged home                | 98 (58)                                            | 35 (19.2)                                      |                           | 106 (79.1)                                             | 21 (45.7)                                         |                           |
| Admitted to ED                 | 43 (25.4)                                          | 78 (42.9)                                      |                           | 21 (15.7)                                              | 15 (32.6)                                         |                           |
| Admitted to ward               | 28 (16.6)                                          | 69 (37.9)                                      |                           | 7 (5.2)                                                | 10 (21.7)                                         |                           |



1  
2  
3  
4  
5  
6  
7  
8  
9  
10  
11  
12  
13  
14  
15  
16  
17  
18  
19  
20  
21  
22  
23  
24  
25  
26  
27  
28  
29  
30  
31  
32  
33  
34  
35  
36  
37  
38  
39  
40  
41  
42  
43  
44  
45  
46

|                                  |            |            |         |   |   |   |
|----------------------------------|------------|------------|---------|---|---|---|
| LOC reported                     | 49 (34.8)  | 85 (53.1)  | 0.005   | - | - | - |
| Amnesia reported                 | 85 (71.4)  | 140 (91.5) | <0.0001 | - | - | - |
| Brain CT performed               | 116 (68.6) | 150 (82.4) | 0.003   | - | - | - |
| Intracranial injuries on head CT | 2 (1.7)    | 28 (18.6)  | <0.0001 | - | - | - |

§  $\chi^2$ , z-test, t-test

For peer review only

**Figure S1.** Percent of screened ED presentations aged 18-65 years with confirmed or indeterminate mTBI (total 30 479 screened, 351 confirmed mTBI (1.15%), 180 indeterminate mTBI (0.6%)).

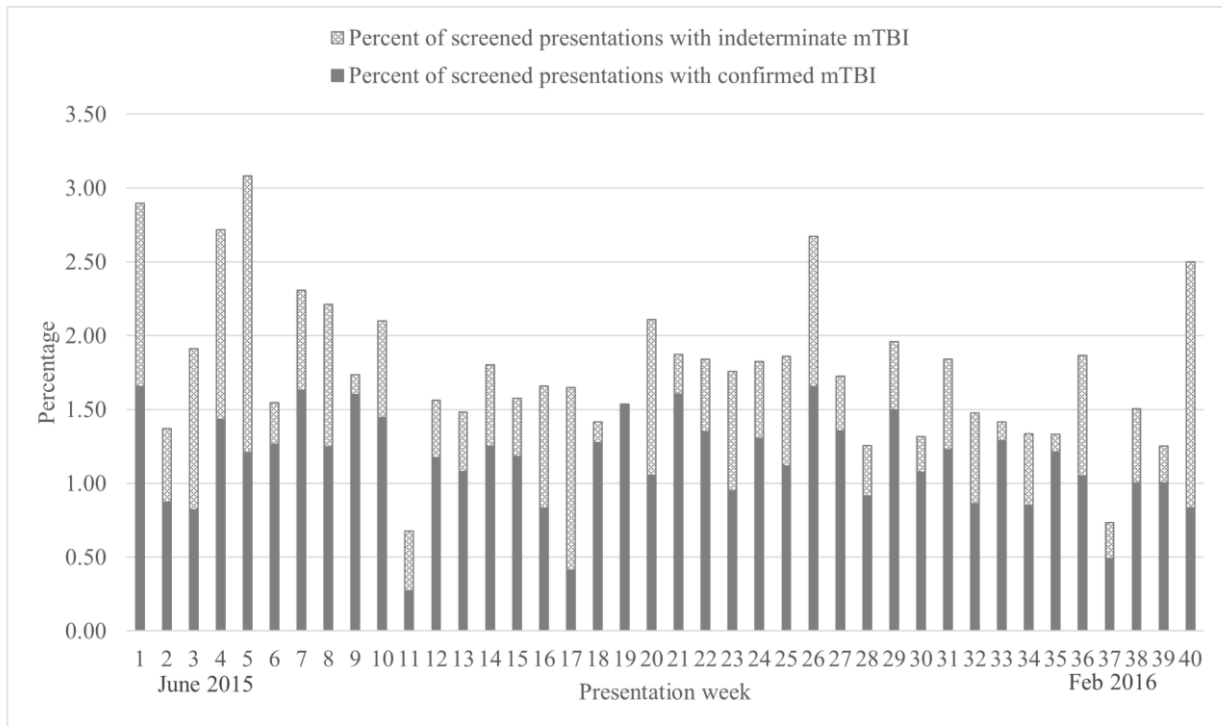

iew only

STROBE Statement—checklist of items that should be included in reports of observational studies  
**YOU MUST NOTE THE PAGE NUMBER WHERE EACH ITEM IS REPORTED INSIDE THE BRACKETS [ ]. IF NOT APPLICABLE WRITE N/A**

|                           | Item No | Recommendation                                                                                                                                                                                                                                                                                                                                                                                                                                                                                                                                                                                                                                                                                                             |
|---------------------------|---------|----------------------------------------------------------------------------------------------------------------------------------------------------------------------------------------------------------------------------------------------------------------------------------------------------------------------------------------------------------------------------------------------------------------------------------------------------------------------------------------------------------------------------------------------------------------------------------------------------------------------------------------------------------------------------------------------------------------------------|
| <b>Title and abstract</b> | 1       | (a) Indicate the study's design with a commonly used term in the title or the abstract [ 1, 3 ]<br>(b) Provide in the abstract an informative and balanced summary of what was done and what was found [ 3 ]                                                                                                                                                                                                                                                                                                                                                                                                                                                                                                               |
| <b>Introduction</b>       |         |                                                                                                                                                                                                                                                                                                                                                                                                                                                                                                                                                                                                                                                                                                                            |
| Background/rationale      | 2       | Explain the scientific background and rationale for the investigation being reported [ 5-7 ]                                                                                                                                                                                                                                                                                                                                                                                                                                                                                                                                                                                                                               |
| Objectives                | 3       | State specific objectives, including any prespecified hypotheses [ 7 ]                                                                                                                                                                                                                                                                                                                                                                                                                                                                                                                                                                                                                                                     |
| <b>Methods</b>            |         |                                                                                                                                                                                                                                                                                                                                                                                                                                                                                                                                                                                                                                                                                                                            |
| Study design              | 4       | Present key elements of study design early in the paper [ 7 ]                                                                                                                                                                                                                                                                                                                                                                                                                                                                                                                                                                                                                                                              |
| Setting                   | 5       | Describe the setting, locations, and relevant dates, including periods of recruitment, exposure, follow-up, and data collection [ 7 ]                                                                                                                                                                                                                                                                                                                                                                                                                                                                                                                                                                                      |
| Participants              | 6       | (a) <i>Cohort study</i> —Give the eligibility criteria, and the sources and methods of selection of participants. Describe methods of follow-up [ 7 ]<br><i>Case-control study</i> —Give the eligibility criteria, and the sources and methods of case ascertainment and control selection. Give the rationale for the choice of cases and controls [ ]<br><i>Cross-sectional study</i> —Give the eligibility criteria, and the sources and methods of selection of participants [ ]<br>(b) <i>Cohort study</i> —For matched studies, give matching criteria and number of exposed and unexposed [ N/A ]<br><i>Case-control study</i> —For matched studies, give matching criteria and the number of controls per case [ ] |
| Variables                 | 7       | Clearly define all outcomes, exposures, predictors, potential confounders, and effect modifiers. Give diagnostic criteria, if applicable [ 8-9 ]                                                                                                                                                                                                                                                                                                                                                                                                                                                                                                                                                                           |
| Data sources/ measurement | 8*      | For each variable of interest, give sources of data and details of methods of assessment (measurement). Describe comparability of assessment methods if there is more than one group [ 8-9 ]                                                                                                                                                                                                                                                                                                                                                                                                                                                                                                                               |
| Bias                      | 9       | Describe any efforts to address potential sources of bias [ 16 ]                                                                                                                                                                                                                                                                                                                                                                                                                                                                                                                                                                                                                                                           |
| Study size                | 10      | Explain how the study size was arrived at [N/A ]                                                                                                                                                                                                                                                                                                                                                                                                                                                                                                                                                                                                                                                                           |
| Quantitative variables    | 11      | Explain how quantitative variables were handled in the analyses. If applicable, describe which groupings were chosen and why [ N/A ]                                                                                                                                                                                                                                                                                                                                                                                                                                                                                                                                                                                       |
| Statistical methods       | 12      | (a) Describe all statistical methods, including those used to control for confounding [ N/A ]<br>(b) Describe any methods used to examine subgroups and interactions [N/A ]<br>(c) Explain how missing data were addressed [ N/A ]<br>(d) <i>Cohort study</i> —If applicable, explain how loss to follow-up was addressed [N/A ]<br><i>Case-control study</i> —If applicable, explain how matching of cases and controls was addressed [ ]<br><i>Cross-sectional study</i> —If applicable, describe analytical methods taking account of sampling strategy [ ]<br>(e) Describe any sensitivity analyses [ N/A ]                                                                                                            |

Continued on next page

| <b>Results</b>           |     |                                                                                                                                                                                                                                                                                                                                                                                                                                                                                  |
|--------------------------|-----|----------------------------------------------------------------------------------------------------------------------------------------------------------------------------------------------------------------------------------------------------------------------------------------------------------------------------------------------------------------------------------------------------------------------------------------------------------------------------------|
| Participants             | 13* | (a) Report numbers of individuals at each stage of study—eg numbers potentially eligible, examined for eligibility, confirmed eligible, included in the study, completing follow-up, and analysed [ 9 ]<br>(b) Give reasons for non-participation at each stage [ 9 ]<br>(c) Consider use of a flow diagram [ 9; Figure 1 ]                                                                                                                                                      |
| Descriptive data         | 14* | (a) Give characteristics of study participants (eg demographic, clinical, social) and information on exposures and potential confounders [ 9-11 ; Table 1 ]<br>(b) Indicate number of participants with missing data for each variable of interest [ Table 1 ]<br>(c) <i>Cohort study</i> —Summarise follow-up time (eg, average and total amount) [ N/A ]                                                                                                                       |
| Outcome data             | 15* | <i>Cohort study</i> —Report numbers of outcome events or summary measures over time [ 9-11 ]<br><i>Case-control study</i> —Report numbers in each exposure category, or summary measures of exposure [ ]<br><i>Cross-sectional study</i> —Report numbers of outcome events or summary measures [ ]                                                                                                                                                                               |
| Main results             | 16  | (a) Give unadjusted estimates and, if applicable, confounder-adjusted estimates and their precision (eg, 95% confidence interval). Make clear which confounders were adjusted for and why they were included [proportions are presented in pg 7 and in Table 1 ]<br>(b) Report category boundaries when continuous variables were categorized [ N/A ]<br>(c) If relevant, consider translating estimates of relative risk into absolute risk for a meaningful time period [N/A ] |
| Other analyses           | 17  | Report other analyses done—eg analyses of subgroups and interactions, and sensitivity analyses [ 11-12]                                                                                                                                                                                                                                                                                                                                                                          |
| <b>Discussion</b>        |     |                                                                                                                                                                                                                                                                                                                                                                                                                                                                                  |
| Key results              | 18  | Summarise key results with reference to study objectives [ 12 ]                                                                                                                                                                                                                                                                                                                                                                                                                  |
| Limitations              | 19  | Discuss limitations of the study, taking into account sources of potential bias or imprecision. Discuss both direction and magnitude of any potential bias [ 12, 16-17 ]                                                                                                                                                                                                                                                                                                         |
| Interpretation           | 20  | Give a cautious overall interpretation of results considering objectives, limitations, multiplicity of analyses, results from similar studies, and other relevant evidence [ 12-16 ]                                                                                                                                                                                                                                                                                             |
| Generalisability         | 21  | Discuss the generalisability (external validity) of the study results [ 16]                                                                                                                                                                                                                                                                                                                                                                                                      |
| <b>Other information</b> |     |                                                                                                                                                                                                                                                                                                                                                                                                                                                                                  |
| Funding                  | 22  | Give the source of funding and the role of the funders for the present study and, if applicable, for the original study on which the present article is based [ 18 ]                                                                                                                                                                                                                                                                                                             |

\*Give information separately for cases and controls in case-control studies and, if applicable, for exposed and unexposed groups in cohort and cross-sectional studies.

# BMJ Open

## Challenges in the acute identification of mild traumatic brain injuries: results from an emergency department surveillance study

|                                 |                                                                                                                                                                                                                                                                                                                                                                                                                                                                                                                                                                                                                                                                                                                                    |
|---------------------------------|------------------------------------------------------------------------------------------------------------------------------------------------------------------------------------------------------------------------------------------------------------------------------------------------------------------------------------------------------------------------------------------------------------------------------------------------------------------------------------------------------------------------------------------------------------------------------------------------------------------------------------------------------------------------------------------------------------------------------------|
| Journal:                        | <i>BMJ Open</i>                                                                                                                                                                                                                                                                                                                                                                                                                                                                                                                                                                                                                                                                                                                    |
| Manuscript ID                   | bmjopen-2019-034494.R1                                                                                                                                                                                                                                                                                                                                                                                                                                                                                                                                                                                                                                                                                                             |
| Article Type:                   | Original research                                                                                                                                                                                                                                                                                                                                                                                                                                                                                                                                                                                                                                                                                                                  |
| Date Submitted by the Author:   | 28-Nov-2019                                                                                                                                                                                                                                                                                                                                                                                                                                                                                                                                                                                                                                                                                                                        |
| Complete List of Authors:       | Pozzato, Ilaria; University of Sydney, John Walsh Centre for Rehabilitation Research; University of Sydney - John Walsh Centre for Rehabilitation Research<br>Meares, Susanne; Macquarie University<br>Kifley, Annette; University of Sydney, Centre for Vision Research<br>Craig, Ashley; University of Sydney, Northern Clinical School;<br>Gillett, Mark; University of Sydney, Rehabilitation Studies Unit<br>Vu, Kim Van; University of Sydney, John Walsh Centre for Rehabilitation Research, Kolling Institute<br>Liang, Anthony; University of Sydney, Centre for Vision Research<br>Cameron, Ian; University of Sydney, Rehabilitation Studies Unit<br>Gopinath, Bamini; University of Sydney, Centre for Vision Research |
| <b>Primary Subject Heading</b>: | Emergency medicine                                                                                                                                                                                                                                                                                                                                                                                                                                                                                                                                                                                                                                                                                                                 |
| Secondary Subject Heading:      | Epidemiology                                                                                                                                                                                                                                                                                                                                                                                                                                                                                                                                                                                                                                                                                                                       |
| Keywords:                       | ACCIDENT & EMERGENCY MEDICINE, EPIDEMIOLOGY, Neurological injury < NEUROLOGY, PUBLIC HEALTH, TRAUMA MANAGEMENT                                                                                                                                                                                                                                                                                                                                                                                                                                                                                                                                                                                                                     |
|                                 |                                                                                                                                                                                                                                                                                                                                                                                                                                                                                                                                                                                                                                                                                                                                    |

SCHOLARONE™  
Manuscripts



I, the Submitting Author has the right to grant and does grant on behalf of all authors of the Work (as defined in the below author licence), an exclusive licence and/or a non-exclusive licence for contributions from authors who are: i) UK Crown employees; ii) where BMJ has agreed a CC-BY licence shall apply, and/or iii) in accordance with the terms applicable for US Federal Government officers or employees acting as part of their official duties; on a worldwide, perpetual, irrevocable, royalty-free basis to BMJ Publishing Group Ltd ("BMJ") its licensees and where the relevant Journal is co-owned by BMJ to the co-owners of the Journal, to publish the Work in this journal and any other BMJ products and to exploit all rights, as set out in our [licence](#).

The Submitting Author accepts and understands that any supply made under these terms is made by BMJ to the Submitting Author unless you are acting as an employee on behalf of your employer or a postgraduate student of an affiliated institution which is paying any applicable article publishing charge ("APC") for Open Access articles. Where the Submitting Author wishes to make the Work available on an Open Access basis (and intends to pay the relevant APC), the terms of reuse of such Open Access shall be governed by a Creative Commons licence – details of these licences and which [Creative Commons](#) licence will apply to this Work are set out in our licence referred to above.

Other than as permitted in any relevant BMJ Author's Self Archiving Policies, I confirm this Work has not been accepted for publication elsewhere, is not being considered for publication elsewhere and does not duplicate material already published. I confirm all authors consent to publication of this Work and authorise the granting of this licence.

1  
2  
3 **Challenges in the acute identification of mild traumatic brain injuries: results from an**  
4 **emergency department surveillance study**  
5  
6  
7  
8  
9

10 Ilaria Pozzato<sup>1</sup> MD, MMed

11 Susanne Meares<sup>2</sup> PhD

12 Annette Kifley<sup>1</sup> PhD

13 Ashley Craig<sup>1</sup> PhD

14 Mark Gillett<sup>3</sup> MD, MclinEd

15 Kim Van Vu<sup>1</sup> B

16 Anthony Liang<sup>1</sup> B

17 Ian D Cameron<sup>1</sup> PhD

18 Bamini Gopinath<sup>1</sup> PhD  
19  
20  
21  
22  
23  
24  
25  
26  
27  
28  
29  
30  
31  
32

33 <sup>1</sup> John Walsh Centre for Rehabilitation Research, Sydney Medical School, Kolling Institute of  
34 Medical Research, The University of Sydney, Sydney, Australia.

35 <sup>2</sup> Department of Psychology, Macquarie University, Sydney, Australia.

36 <sup>3</sup> Emergency Department, Royal North Shore Hospital, Sydney, Australia.  
37  
38  
39  
40  
41  
42  
43  
44

45 Correspondence to: Bamini Gopinath

46 John Walsh Centre for Rehabilitation Research, The University of Sydney,

47 Kolling Institute of Medical Research

48 Corner Reserve Road & Westbourne Street, Royal North Shore Hospital

49 St Leonards, NSW 2065, Australia

50 Telephone: 61 2 9926 4962 Fax: 61 2 9926 4045

51 Email: [bamini.gopinath@sydney.edu.au](mailto:bamini.gopinath@sydney.edu.au)  
52  
53  
54  
55  
56  
57  
58  
59  
60

1  
2  
3  
4  
5  
6  
7  
8  
9  
10  
11  
12  
13  
14  
15  
16  
17  
18  
19  
20  
21  
22  
23  
24  
25  
26  
27  
28  
29  
30  
31  
32  
33  
34  
35  
36  
37  
38  
39  
40  
41  
42  
43  
44  
45  
46  
47  
48  
49  
50  
51  
52  
53  
54  
55  
56  
57  
58  
59  
60

Abstract: 260/300; Text: 3797/400; Tables: 4; Figures: 1; Supplementary material:6.

For peer review only



## ABSTRACT

**Objectives:** To establish the proportion of mild traumatic brain injury (mTBI) diagnosis among people presenting to an Emergency Department (ED), to determine the accuracy of recorded ED diagnoses. We also aimed to describe challenges in mTBI case identification and its acute hospital management.

**Design and Setting:** A retrospective chart review of all ED attendances to a major trauma hospital, over a 9-month period (June 2015-February 2016).

**Participants:** Adults aged 18-65 years consecutively presenting to an ED.

**Primary Outcome Measures:** Proportion of mTBI diagnosis among ED attendances, (i.e. confirmed mTBI based on the World Health Organization (WHO) criteria or indeterminate mTBI based on secondary criteria), and proportion of accurately recorded mTBI diagnosis by ED clinicians (i.e. 'mTBI, 'concussion').

**Results:** Of 30 479 ED attendances, 351 (1.15%) confirmed mTBI diagnosis and 180 (0.6%) indeterminate diagnosis were identified. Only 81 (23.1%) individuals with a confirmed mTBI had a 'mTBI diagnosis' clearly recorded in the medical notes. Of the allocated discharge diagnosis codes to the two identified cohorts, 89.8% were not indicative of mTBI. Intracranial injuries were found in 31 (8.5%) confirmed cases. Glasgow Coma Scale scores were consistently assessed in the ED but identified only 117 (33.3%) confirmed mTBI cases. Post-traumatic amnesia (PTA) testing was able to confirm acute cognitive impairment, in 113 (62.1%) of those who were tested (182, 51.3%).

**Conclusions:** mTBI is a common, but an under-recognized cause for ED attendance. Despite challenges, the use of an operational definition such as the WHO diagnostic criteria can improve accuracy in mTBI identification. Acute management may be enhanced by rapid assessment of PTA.

## STRENGTHS AND LIMITATIONS OF THIS STUDY

- A systematic chart review of all Emergency Department attendances was employed to capture any possible mild traumatic brain injury (mTBI) case.
- The use of standard diagnostic criteria to establish the occurrence of mTBI diagnosis, ensures accuracy in identification and comparability across existing research.
- This study provides novel data on proportions of rapid post-traumatic amnesia screening in NSW, Australia, where there is written recommendation around PTA screening in all Emergency Departments.
- Collecting data from single hospital site limits generalizability of study findings.
- Given the retrospective design, conclusions on mTBI occurrence and accuracy of designation were limited by the availability of documented clinical information, with mTBI occurrence possibly being underestimated.

## INTRODUCTION

Mild traumatic brain injuries (mTBI) are a serious public health problem that is referred to as a 'silent epidemic'. [1] Though being the least severe of all brain injuries, identification is the most challenging, with mTBI often missed at diagnosis. [2] Major barriers to mTBI identification are the wide variability in criteria used for diagnosis and the lack of sensitive standardized measures for identifying mTBI manifestations, which are commonly subtle and rapidly-resolving. [2, 3] Despite these limitations, the World Health Organization (WHO) best-evidence review estimated that hospital-treated mTBI are in the range of 100-300/100 000 population. [4] Diagnosis and management of mTBI largely occur in an emergency department (ED). [5] Little information exists, however, about the accuracy of mTBI identification in emergency settings. Two studies, conducted in three Canadian EDs [6] and two EDs in the US, [7] found that up to 50% of patients sustaining mTBI received an inaccurate ED diagnosis. Poor identification likely impacts clinical management of these patients. Given trends in increasing ED attendances for head trauma [8, 9] there is a critical need to for research that addresses the challenges in mTBI diagnosis.

Another challenge for ED clinicians is the identification of mTBI cases at major risk of complications versus those who can be safely discharged. [10] Latest research suggests that these so-called minor injuries can have long-term impacts that extend beyond the anticipated 3-month timeframe of cognitive recovery for uncomplicated cases, calling for urgent improvements in the acute management of mTBI. Long-term impacts include higher health care usage [11], psychosocial complications [12, 13] and in vulnerable subgroups chronic cognitive symptomatology [12, 14] and neural cellular alterations [15, 16] not easily detectable by routine radiological examinations that may increase the risk of neurodegeneration. [17] EDs represent a crucial point where accurate identification and early management of these patients may prevent long-term personal and economic impacts.

1  
2  
3 Key steps to aid early and accurate identification and management of mTBI include  
4  
5 enhanced consistency in diagnostic criteria and standardized assessment methods.[3] An  
6  
7 internationally-recognised operational definition was developed by the WHO Task Force,[3, 4]  
8  
9 clearly outlining the four key clinical manifestations for mTBI diagnosis. These are:(i) level of  
10  
11 consciousness, (ii) confusion or disorientation, (iii) post-traumatic amnesia (PTA) and (iv)  
12  
13 transient neurological abnormalities, such as computed tomography (CT)-detected intracranial  
14  
15 injuries, the latter defined as complicated mTBI (about 10% of cases).[18] Recommended  
16  
17 objective measures to assess TBI 'severity' include conventional radiology to exclude  
18  
19 structural lesions and the Glasgow Coma Scale (GCS) to monitor level of consciousness (i.e.  
20  
21 mTBI is defined as GCS scores of 13-15 out of 15 and a loss of consciousness (LOC) of  $\leq 30$   
22  
23 minutes). However, no clear guidance is given by the WHO on the clinical assessment of the  
24  
25 other TBI diagnostic criteria. [4] This particularly applies to PTA, which is recognized as the  
26  
27 best prognostic indicator of mTBI outcomes. [19, 20]  
28  
29  
30  
31  
32

33 PTA is a complex clinical concept reflecting an acute transient cognitive dysfunction [21]  
34  
35 that presents not only as amnesia but more broadly as a period of inability to store new  
36  
37 information, confusion, disorientation or behavioural changes. [3, 21] While standardized  
38  
39 testing exist to assess the resolution of acute cognitive dysfunction (i.e. PTA) these are rarely  
40  
41 used in the acute management of mTBI patients because many protocols are too lengthy to be  
42  
43 administered in ED settings.[21] In NSW, Australia, the Abbreviated Westmead PTA Scale  
44  
45 (A-WPTAS), [21] was specifically designed for ED use and recommended statewide (NSW  
46  
47 Ministry of Health, Initial management of closed head injury in adults, 2011) as a brief  
48  
49 validated measure of PTA to improve identification of traumatic brain injury events among  
50  
51 closed head injury patients with a GCS of 13-15 (NSW Ministry of Health, Initial management  
52  
53 of closed head injury in adults, 2011). This measure includes five GCS orientation items plus a  
54  
55 memory test of recall of three picture cards learnt on the first trial. The test is repeated hourly  
56  
57  
58  
59  
60

1  
2  
3 for up to four hours until optimal scores of 18 out of 18 are obtained (i.e. 15 on the GCS, plus 3  
4 on the memory test), indicating a resolution of PTA, if present. Though the A-WPTAS has  
5  
6 been shown to assist with a safer discharge of people with mTBI, by identifying cases with a  
7  
8 GCS of 15/15 who remain acutely cognitively impaired, [20] and reducing hospitalization and  
9  
10 direct costs [22], its implementation to date appears inconsistent. Unpublished Australian data  
11  
12 showed that rates of PTA screening in ED range from 0 to 31%, [10] while findings from a  
13  
14 recent randomized controlled trial showed lower rates (i.e. below 13%). [23] This highlights  
15  
16 the need for further studies to investigate the extent and possible benefit of A-WPTAS  
17  
18 implementation in emergency settings.  
19  
20  
21  
22  
23

24 Given the current challenges in mTBI diagnosis and limitations of existing  
25  
26 epidemiological research, this study primarily aimed to establish: (i) the occurrence of mTBI  
27  
28 diagnosis among ED attendances (i.e. meeting standard diagnostic criteria), and the proportion  
29  
30 of these that received a clearly recorded mTBI diagnosis (i.e. based on clinical notes and/or  
31  
32 diagnosis codes). A secondary aim was to describe challenges in acute identification and  
33  
34 management of mTBI, such as the implementation of a validated measure for PTA screening in  
35  
36 ED.  
37  
38  
39  
40  
41

## 42 **METHODS**

43  
44 This is a retrospective cohort study, employing chart review and standard WHO  
45  
46 diagnostic criteria to define occurrence of mTBI among adults aged 18-65 years with ED  
47  
48 attendances of a major trauma hospital in Sydney, Australia, over a 9-month period (from June  
49  
50 2015 to February 2016). Ethical approval was obtained from the Northern Sydney Local Health  
51  
52 District Ethics, Sydney, Australia (LNR/16/HAWKE/388; LNRSSA/16/HAWKE/389). Two  
53  
54 independent chart auditors systematically screened all ED attendances within the study period  
55  
56  
57  
58  
59  
60

1  
2  
3 and reviewed all recorded information in ambulance reports, ED and medical notes, to  
4  
5 determine whether mTBI occurred. Details of the study method are available. [24]  
6

7  
8 The main outcomes were: (i) proportions of identified mTBI diagnosis, meeting WHO  
9  
10 diagnostic criteria, among total ED attendances within 24 hours post-injury, meeting study age-  
11  
12 range and timeframe, and (ii) proportions of accurately recorded mTBI diagnoses by ED  
13  
14 clinicians based on positive mTBI-related definition documented in the medical record. A  
15  
16 confirmed mTBI diagnosis was ascertained based on the presence of any of the four mTBI  
17  
18 manifestations (i.e. level of consciousness, confusion/disorientation, post-traumatic amnesia,  
19  
20 transient neurological abnormalities), as expressed by the corresponding WHO criteria (Table 1  
21  
22 and Online Supplementary Table S1): [4, 21] (i) a GCS of 13–15 30 minutes after injury or on  
23  
24 later presentation to healthcare; and/or loss of consciousness of  $\leq 30$  mins; (ii)  
25  
26 confusion/disorientation, (iii) PTA <24-hours, and/or (iv) CT-detected intracranial injuries not  
27  
28 requiring neurosurgery, respectively.  
29  
30  
31  
32

33  
34 Despite the uniqueness of this study in using a validated measure for PTA screening in  
35  
36 ED, initial chart review indicated PTA testing was not consistently administered. Further,  
37  
38 optimal scores obtained during ED stay would still not be able to identify cases whose PTA  
39  
40 resolved early post-injury [2] (i.e. optimal scores meaning that PTA, if present, had resolved).  
41  
42 These cases could, instead, be identified by any evidence of PTA manifestations (i.e. any gap in  
43  
44 memory, period of confusion/disorientation, behavioral changes) documented by ambulance  
45  
46 and emergency staff in their clinical observations. Therefore, to ascertain the presence of PTA  
47  
48 as criterium for mTBI occurrence, a summary PTA-related mTBI designation (Online  
49  
50 Supplementary Table S2) was developed by cross-checking any PTA-related neurological and  
51  
52 behavioural disturbances documented in medical records, from the time of injury to hospital  
53  
54 discharge. A positive PTA designation was defined by any of the following source: acute  
55  
56 cognitive impairment on A-WPTAS testing, observed behavioural change suggestive of PTA  
57  
58  
59  
60

1  
2  
3 (e.g. repetitive questioning, combative behaviour), as well as any observed/self-reported gap in  
4  
5 memory, or confusion/disorientation thereby fulfilling two of the WHO criteria. [3, 21]  
6

7  
8 In the absence of any documented WHO criterion, indeterminate evidence of mTBI [25]  
9  
10 was defined based on the presence of any secondary criteria: [20] (i) optimal scores (i.e. 18/18)  
11  
12 on the second trial of the A-WPTAS indicating that PTA, if present, had resolved, (ii)  
13  
14 symptoms that may correspond to ‘post-concussion symptoms’ but which are not specific to  
15  
16 mTBI,[24] (iii) transient neurological abnormalities (excluding intracranial injuries not  
17  
18 requiring surgery), which are not common findings or clinical features of mTBI [2, 3] and are  
19  
20 not recommended as stand-alone mTBI criteria,[2] or (iii) queried LOC/amnesia.  
21  
22

23  
24 The accuracy of the diagnosis given by ED clinicians to the identified individuals with  
25  
26 mTBI diagnosis was assessed by the presence of any recorded ‘mTBI’, ‘concussion’, ‘post-  
27  
28 concussion symptoms/syndrome’ diagnoses in medical notes.[26] In addition, allocation of  
29  
30 relevant mTBI-related discharge diagnosis codes (SNOWMED codes) was also explored, to  
31  
32 inform how much routinely collected administrative data could be useful for brain injury  
33  
34 diagnostic purpose.  
35  
36

### 37 38 39 **Patient and Public Involvement**

40  
41 Patients or the public were not involved in the design, or conduct, or reporting, or  
42  
43 dissemination of our research.  
44  
45  
46  
47  
48  
49

## 50 51 **RESULTS**

### 52 53 **Identified cases with mTBI diagnosis**

54  
55 During the study period, 30 479 adults aged 18-65 years attended the ED and were screened  
56  
57 (Figure 1). Of the 587 mTBI-related ED presentations initially identified, 56 cases were  
58  
59  
60

1  
2  
3 excluded due to: (N=27) self-discharge or unclear evidence of mTBI, (N=8) confounding  
4 factors (e.g. intubation, psychosis, medical comorbidities) or possible moderate TBI (e.g.  
5 LOC/amenia of unclear duration). Also excluded were 21 (3.9%) individuals who represented  
6 for the same mTBI event. Among total ED attendances, 351 (1.15%) confirmed mTBI  
7 diagnoses and an additional 180 (0.6%) cases with insufficient/indeterminate mTBI evidence  
8 were identified (Online Supplementary Figure S1). Of these, two people (0.4%) sustained  
9 multiple mTBI (i.e. repetitive mTBI). Sociodemographic, injury-related and acute management  
10 details are illustrated in Table 1-3.

11  
12 A clearly recorded mTBI diagnosis in ED records [26] was present only in 23.1% (N=81)  
13 of confirmed mTBI and 18.9% (N=34) of indeterminate cases. Similarly, among the 551 ED  
14 diagnosis codes (i.e. SNOWMED codes) (Table 4) allocated to the two identified cohorts, the  
15 most commonly used code descriptor was 'injury of head' (N=145, 26.3%). Only 56 of these  
16 codes (10.2%) were specifically indicative of brain injury occurrence, with 'concussion' being  
17 the most common (N=26, 46.4%). The remaining codes mostly reflected intracranial injury  
18 findings (see also Online Supplementary Table S3, which shows the full list of ED discharge  
19 diagnosis codes).

20  
21 Confirmed mTBI cases that were given a clearly-recorded mTBI diagnosis and/or a  
22 discharge code suggestive of mTBI were more likely to (Online Supplementary Table S4): be a  
23 non-traffic-crash related mTBI ( $p<.05$ ), be admitted to a ward ( $p<.05$ ), have CT-detected  
24 intracranial injuries ( $p<.0001$ ), present with headaches ( $p<.05$ ) and/or concentration problems  
25 ( $p<.05$ ), and be recommended for follow-up care ( $p<.01$ ). Furthermore, those with a clearly-  
26 recorded mTBI diagnosis were more likely to have been tested for PTA ( $p=.0003$ ), while those  
27 with an allocated discharge code suggestive of mTBI were more likely to have a clearly written  
28 mTBI diagnosis in their ED records also ( $p=.04$ ).



### **Injury-related characteristics**

Cases with a confirmed mTBI diagnosis met the following WHO criteria: initial GCS of 13-14 (i.e. at the scene 30 minutes post-injury/at ED admission; N=117; 33.3%), LOC (i.e. witnessed/self-reported; N=185; 52.7%), amnesia (i.e. observed/self-reported; N=229; 65.2%), confusion/disorientation (N=97; 27.6%), and CT-detected intracranial injuries (N=31; 8.8%).

Multiple WHO criteria were present in 186 cases (53%) (Table 1). Cases with an indeterminate mTBI diagnosis met the following secondary criteria in the absence of WHO criteria: optimal scores of 18/18 on the A-WPTAS (N=45; 25%), presence of post-concussion symptoms (133; 73.9%), transient neurological abnormalities (N=22; 12.2%) queried LOC (N=12; 6.7%) and/or queried amnesia (N=3; 1.7%). Multiple secondary criteria were present in 32 cases (17.8%).

Fall was the most common cause of mTBI in both confirmed (39.1%) and indeterminate (31.1%) groups, followed by motor vehicle crash (28.2% - confirmed; 24.4% - indeterminate). Alcohol or drug use in association with the injury was self-reported or clinically observed in 127 (36.2%) confirmed cases compared to only 19 (10.6 %) of indeterminate cases ( $p<.001$ ).

### **Acute hospital management details**

Brain imaging was undertaken in 75.8% of cases with a confirmed mTBI diagnosis and 40.6% of cases with an indeterminate mTBI ( $p<.001$ ; Table 3). Only 182 (51.8%) individuals with a confirmed mTBI were tested for PTA (i.e. A-WPTAS or WPTAS). Of these, the majority (106; 58.4%) had a PTA duration of >1 to 12 hours, 32 (17.8%) obtained optimal scores of 18/18 (i.e. did not fail A-WPTAS testing) and 37 (20.4%) had an unknown designation due to incomplete/missing documentation. Median time to the first PTA testing was 3.7 (2.3-6.1) hours post-injury for confirmed mTBI diagnosis and 2.5 (1.7-4.9) hours for indeterminate mTBI.

1  
2  
3 The summary PTA-related mTBI designation (Online Supplementary Tables S2)  
4 including any documented positive PTA-related findings (i.e. neurological and behavioural  
5 disturbances) in the medical records, identified a total of 260 (74.1%) confirmed mTBI cases  
6 with PTA. The majority (89.8%) were identified based on two WHO criteria of observed/self-  
7 reported amnesia (i.e. any gap in memory) and/or period of confusion/ disorientation, with a  
8 further nine people deemed in PTA only due to failing the A-WPTAS (N=8) or due to reported  
9 behavioral changes in medical records, (N=1) (i.e. repetitive questioning). All these nine cases,  
10 except one, also met at least one of the other mTBI WHO criteria (e.g. LOC, GCS=13-14,  
11 intracranial injuries).

12  
13  
14 In both groups, people tested for PTA were more likely to (Online Supplementary Table  
15 S5): be transported to ED by ambulance ( $p<.01$ ); sustain a traffic-related mTBI ( $p<.001$ ); be  
16 admitted to ED/ward ( $p<.0001$ ). Confirmed mTBI cases were more likely tested for PTA in the  
17 presence of other mTBI signs, such as LOC ( $p=.005$ ), amnesia ( $p<.0001$ ) and brain imaging  
18 ( $p=0.003$ ) with positive findings ( $p<.0001$ ).

## 19 20 21 22 23 24 25 26 27 28 29 30 31 32 33 34 35 36 37 38 **DISCUSSION**

39  
40 By using the WHO operational criteria, our study reports an occurrence of confirmed mTBI  
41 diagnosis among ED total attendances of 1.2% (351/30 479). These findings correspond to the  
42 1.1-1.3% proportion observed in a preliminary study, which used the same criteria and methods  
43 for TBI diagnosis [20, 24] therefore confirming the robustness of the proposed WHO  
44 surveillance system for acute mTBI identification. A similar proportion of mTBI cases seeking  
45 emergency care (1.9%; 670/35 096) was also reported in a prospective cohort study conducted  
46 in a large metropolitan ED in New York. [27] This study employed the alike 1993 American  
47 College of Rehabilitation Medicine criteria,[27] as operational definition, suggesting that using  
48  
49  
50  
51  
52  
53  
54  
55  
56  
57  
58  
59  
60

1  
2  
3 standard diagnostic criteria can enhance consistency in mTBI identification and comparability  
4  
5 of study findings.  
6

7  
8 Worryingly, only 23.1% (81/351) of our identified cohort with a confirmed mTBI  
9  
10 diagnosis (i.e. meeting the WHO criteria) had an accurate mTBI diagnosis documented in the  
11  
12 medical records (i.e. written diagnosis of ‘concussion’, ‘mTBI’). The proportion of accurate  
13  
14 diagnoses was much lower than reported in two previous prospective studies conducted in  
15  
16 Canada [6] and the US [7] respectively, being  $\geq 50\%$ . While using a retrospective design could  
17  
18 account for these differences, global challenges certainly exist in the acute identification of  
19  
20 ‘minor’ TBI events. This study contributes by providing unique Australian data and suggests  
21  
22 that adopting standard criteria and the assessment of PTA provide so far the best approach to  
23  
24 improve accuracy of mTBI diagnosis.  
25  
26  
27

28  
29 Poor accuracy in mTBI identification in ED [3, 17] could affect current estimates of 100-  
30  
31 300/100 000 reported in a WHO review,[4] hence, underestimating the ‘true’ incidence of  
32  
33 hospital-treated mTBI. Surveillance systems, such as accurate administrative databases, are  
34  
35 recommended strategies to tackle this problem. However, the use of discharge diagnosis codes,  
36  
37 such as ICD coding, in hospital databases has previously been shown not to be sensitive in  
38  
39 detecting mTBI. [26, 27] Our results confirm this gap. Only 10.7% (59/551) of ED discharge  
40  
41 diagnosis codes (SNOWMED codes) allocated to the identified cohorts with either a confirmed  
42  
43 or indeterminate mTBI diagnosis were indicative of mTBI. Despite limitations in the number of  
44  
45 diagnoses able to be recorded (i.e. maximum two SNOWMED codes), there seems to be a  
46  
47 trend for ED clinicians to better identify the more ‘severe’ injuries, i.e. those showing positive  
48  
49 CT findings, being admitted to a ward and receiving follow-up care recommendations. By  
50  
51 contrast, uncomplicated mTBI appears to be overlooked, by not receiving an accurate  
52  
53 designation in ED records or accurate coding. There was also an interchangeable use of terms  
54  
55 like ‘concussion’, ‘(mild/minor) head injury’ and ‘mTBI’, as also shown in previous studies,  
56  
57  
58  
59  
60

1  
2  
3 [3, 17, 27] that suggest a poor clarity in the distinction between those having a traumatic brain  
4 injury versus simple head injuries, thus reiterating the scarce utility of administrative data in  
5 mTBI identification.  
6  
7  
8  
9

10 While the WHO criteria can be regarded as a reliable system for the identification of  
11 individuals who sustained a mTBI, there were challenges in its application. [2] First, it was  
12 unclear how to interpret LOC or amnesia when it was not witnessed/observed as per WHO  
13 recommendations for mTBI identification. It is likely that injured people report a LOC or  
14 amnesia interchangeably, [2] thus, a self-reported LOC/amnesia at the time of the injury  
15 suggests a confirmed mTBI diagnosis. Conversely, when LOC/amnesia was queried by a  
16 physician this more likely suggests indeterminate evidence of mTBI.  
17  
18  
19  
20  
21  
22  
23  
24  
25

26 PTA is the most important TBI prognostic indicator, yet the most challenging to evaluate  
27 because it encompasses a series of acute cognitive impairment signs and symptoms. This study  
28 is unique in its way of screening for PTA in ED by means of a validated measure. However,  
29 standard PTA testing was only available in about half of confirmed mTBI cases (51.9%),  
30 though this was considerably higher than previously reported PTA screening rates (up to  
31 31%). [10, 23] Also, optimal scores of 18/18 on the A-WTPAS were obtained in 17.8% of those  
32 who were tested. While optimal scores clearly indicate the absence of acute cognitive  
33 dysfunction at the time of assessment (i.e. a person is not in PTA), these cannot exclude that  
34 PTA was present before that time, not being informative for mTBI diagnostic purpose.  
35  
36  
37  
38  
39  
40  
41  
42  
43  
44  
45  
46

47 Therefore, this study used a summary PTA-related mTBI designation, accounting for the  
48 positive presence of any PTA-related neurological and behavioural disturbances recorded in  
49 medical records. [3, 21] Using this indicator, we found 260 of the 351 cases with a confirmed  
50 mTBI diagnosis were deemed to be in PTA. Of these, the majority (89.8%) was based on the  
51 presence of observed/self-reported amnesia (i.e. a gap in memory) or confusion/disorientation  
52 (i.e. meeting two of the four WHO criteria), while 9 (2.6%) cases were further identified based  
53  
54  
55  
56  
57  
58  
59  
60

1  
2  
3 only on evidence of acute cognitive impairment (i.e. failing PTA testing; N=8) or observed  
4 behavioral changes (N=1), the latter being repetitive questioning that is typically an indirect  
5 sign of PTA. These additional cases, except one, all met at least one of the other WHO criteria  
6 (e.g. LOC, GCS=13-14, intracranial injuries) for mTBI diagnosis.  
7  
8  
9  
10  
11

12 Overall, these findings reiterate that the WHO criteria together constitute the most  
13 reliable surveillance system for mTBI identification and provide useful information to  
14 specifically identify cases whose PTA may have resolved by the time of ED admission.  
15 Additionally, the implementation of PTA testing, providing objective estimates of acute  
16 cognitive impairment may assist in monitoring recovery progress towards a safer discharge and  
17 enhance diagnostic accuracy of cases where mTBI indicators are unclear or unavailable. The  
18 administration of brief PTA testing (i.e. the A-WTPAS) as an extension of the GCS, which is  
19 usually assessed at the scene by the ambulance staff, [21] could provide a more accurate  
20 estimate of the presence and duration of PTA, thus of mTBI occurrence.  
21  
22  
23  
24  
25  
26  
27  
28  
29  
30  
31  
32

33 Another challenge was the assessment of transient neurological abnormalities, other than  
34 intracranial injuries. Ruff et al. (2009) suggested these abnormalities in isolation do not  
35 constitute a strong basis for mTBI diagnosis because they are not common or typical features of  
36 mTBI.[2] Thus, these were considered as indeterminate evidence of mTBI. The WHO also  
37 recommends excluding cases whose TBI manifestations can be affected or due to other  
38 factors.[28] Unlike other confounders (e.g. intubation, psychiatric disorder), the influence of  
39 alcohol/drug on mTBI manifestations was particularly difficult to assess due to the lack of  
40 objective blood level measurements. Overall, these cases accounted for 36.2% of confirmed  
41 mTBI, that is, in the range of previous findings (30-60%). [29, 30] These findings confirm  
42 intoxication is a major confound affecting accurate identification of mTBI in busy ED settings,  
43 with day of injury blood alcohol level being associated with: failure on PTA assessment, [20] a  
44 longer duration of LOC, and decreased GCS scores. [31] Differentiation of mTBI in these  
45  
46  
47  
48  
49  
50  
51  
52  
53  
54  
55  
56  
57  
58  
59  
60

1  
2  
3 individuals in the ED setting is likely to be facilitated by the potential implementation of blood  
4  
5 based biomarkers.[32]  
6

7  
8 This study confirms that issues exist in identifying the mildest TBIs,[2] whose clinical  
9  
10 manifestations may resolve within <15 minutes post-injury according to the American  
11  
12 Academy of Neurology classification.[2] Considering the amount of missing or non-  
13  
14 informative/optimal indicators among cases with a confirmed mTBI in this study, as also  
15  
16 reported by previous research,[33] along with PTA measured 2-3 hours post-injury,[21] it is  
17  
18 likely that rapid-resolving LOC/amnesia were missed with a bias towards more severe mTBI.  
19  
20 Secondary criteria were established to identify cases with indeterminate evidence of TBI. These  
21  
22 cases constituted 0.6% of ED total attendances and, interestingly, 18.9% of these received a  
23  
24 positive mTBI diagnosis by ED clinicians. Another study using a similar (probabilistic)  
25  
26 approach found delayed functional recovery in the group with debatable mTBI compared to  
27  
28 healthy and trauma controls, [25] raising concerns around the need for identifying and treating  
29  
30 less-severe mTBI that may appear to not meet diagnostic criteria.  
31  
32  
33

34  
35 Intracranial injuries were found in 31 (8.8%) cases with a confirmed mTBI diagnosis.  
36  
37 [18] Brain CT was performed in 75.8%, plus in 40% of cases with an indeterminate mTBI [18]  
38  
39 Clinical assessment remains the gold-standard for mTBI identification, with PTA testing being  
40  
41 the most promising measure. Among those who were tested, the A-WPTAS was able to detect  
42  
43 acute cognitive impairment in 62.1% of cases (113/182), while the GCS was able to detect only  
44  
45 33.5% of cases (117/349).[20] This study further suggests that when PTA is measured it  
46  
47 increases the likelihood of an accurate mTBI designation provided by ED clinicians.  
48  
49 Implementation of PTA testing in ED settings should be, thus, extended to all individuals with  
50  
51 a possible mTBI [21] to reduce the risk of missed opportunity for mTBI identification and to  
52  
53 contribute to more accurate clinical decision making and safer discharge of patients.  
54  
55  
56  
57  
58  
59  
60

## Study Limitations

Major strengths of this study were the use of standard diagnostic criteria for the identification of mTBI and the systematic screening of any cases with a possible mTBI diagnosis among ED attendances. However, the retrospective design is limiting as we might not have captured important information on confounding factors or mTBI indicators. Similarly, the absence of documented information in medical records does not necessarily imply that standard diagnostic criteria or assessment protocols were not applied by ED clinicians. Generalizability of findings is limited by the following selection bias:[30] a working-age population, 9-month audit-period, and using only a single hospital site. Some of these issues will be addressed by conducting a multi-site study in the future.

## CONCLUSIONS

mTBI may have higher impacts on emergency care settings than previously anticipated. This study confirms the use of an operational definition, such as the WHO operational criteria as a reliable surveillance system for acute identification of mTBI, although challenges still exist in its meticulous application. Identification, prognosis and acute management of individuals with mTBI would be greatly enhanced by the implementation of standardised PTA screening (e.g. A-WPTAS) early after injury. Improvements in clinical and administrative designation of these injuries requires the use of these data to monitor and address long-term health and economic impacts of mTBI.

1  
2  
3 **Funding Support:** This study has received research grant support by the Ramsay Research and  
4  
5 Teaching Fund – Northern Sydney Local Health District, Sydney, Australia. The funding  
6  
7 source had no role in study design, data collection and analysis, decision to publish and in the  
8  
9 writing of this manuscript.  
10  
11  
12  
13  
14  
15

16 **Competing interests:** None.  
17  
18  
19  
20  
21

22 **Contributors:** All authors - IP, SM, AK, AC, MG, KVV, AL, IDC, BG - provided inputs in  
23  
24 study design. IP, KVV, AL, AK, SM and BG were involved in data collection and data  
25  
26 analysis. IP and BG are responsible for publication writing. All authors reviewed and approved  
27  
28 the final version of this manuscript.  
29  
30  
31  
32  
33  
34  
35  
36  
37  
38  
39  
40  
41  
42  
43  
44  
45  
46  
47  
48  
49  
50  
51  
52  
53  
54  
55  
56  
57  
58  
59  
60



## REFERENCES

1. Goldstein M. Traumatic brain injury: a silent epidemic. *Ann Neurol* 1990;27:327.
2. Ruff RM, Iverson GL, Barth JT, et al. Recommendations for diagnosing a mild traumatic brain injury: a National Academy of Neuropsychology education paper. *Arch Clin Neuropsychol* 2009;24:3-10.
3. Kristman VL, Borg J, Godbolt AK, et al. Methodological issues and research recommendations for prognosis after mild traumatic brain injury: results of the International Collaboration on Mild Traumatic Brain Injury Prognosis. *Arch Phys Med Rehabil* 2014;95:S265-S277.
4. Cassidy JD, Carroll L, Peloso P, et al. Incidence, risk factors and prevention of mild traumatic brain injury: results of the WHO Collaborating Centre Task Force on Mild Traumatic Brain Injury. *J Rehabil Med* 2004;36:28-60.
5. Michelson EA, Huff JS, Loparo M, et al. Emergency Department Time Course for Mild Traumatic Brain Injury Workup. *West J Emerg Med* 2018;19:635-640.
6. Rowe BH, Eliyahu L, Lowes J, et al. Concussion diagnoses among adults presenting to three Canadian emergency departments: missed opportunities. *Am J Emerg Med* 2018;36:2144-2151.
7. Powell J, Ferraro J, Dikmen S, et al. Accuracy of mild traumatic brain injury diagnosis. *Arch Phys Med Rehabil* 2008 89:1550-1555.
8. Marin JR, Weaver MD, Yealy DM, et al. Trends in visits for traumatic brain injury to emergency departments in the United States. *JAMA* 2014;311:1917-1919.
9. Gaw CE, Zonfrillo MR. Emergency department visits for head trauma in the United States. *BMC Emerg Med* 2016;16:5.
10. Bosch M, McKenzie JE, Mortimer D, et al. Implementing evidence-based recommended practices for the management of patients with mild traumatic brain injuries in

1  
2  
3 Australian emergency care departments: study protocol for a cluster randomised controlled  
4 trial. *Trials* 2014;15:1-20.

7 11. Kirsch NL, de Leon MB, Maio RF, et al. Characteristics of a mild head injury subgroup  
8 with extreme, persisting distress on the Rivermead Postconcussion Symptoms questionnaire.  
9  
10  
11  
12 *Arch Phys Med Rehabil* 2010;91:35-42.

14 12. Theadom A, Starkey N, Barker-Collo S, et al. Population-based cohort study of the  
15 impacts of mild traumatic brain injury in adults four years post-injury. *PLoS One*  
16  
17  
18  
19  
20  
21 2018;13:e0191655.

22 13. Stein MB, Jain S, Giacino JT, et al. Risk of Posttraumatic Stress Disorder and Major  
23 Depression in Civilian Patients After Mild Traumatic Brain Injury: A TRACK-TBI Study.  
24  
25  
26  
27  
28 *JAMA Psychiatry* 2019;76:249-258.

29 14. Karr JE, Areshenkoff CN, Garcia-Barrera MA. The neuropsychological outcomes of  
30 concussion: A systematic review of meta-analyses on the cognitive sequelae of mild traumatic  
31  
32  
33  
34  
35  
36  
37  
38  
39  
40  
41  
42  
43  
44  
45  
46  
47  
48  
49  
50  
51  
52  
53  
54  
55  
56  
57  
58  
59  
60  
32  
33  
34  
35  
36  
37  
38  
39  
40  
41  
42  
43  
44  
45  
46  
47  
48  
49  
50  
51  
52  
53  
54  
55  
56  
57  
58  
59  
60  
The copyright holder for this preprint (which was not certified by peer review) is the author/funder, who has granted medRxiv a license to display the preprint in perpetuity. It is made available under aCC-BY 4.0 International license.

15. Arneson D, Zhang G, Ying Z, et al. Single cell molecular alterations reveal target cells  
and pathways of concussive brain injury. *Nat Commun* 2018;9:3894.

16. Hocke LM, Duszynski CC, Debert CT, et al. Reduced Functional Connectivity in  
Adults with Persistent Post-Concussion Symptoms: A Functional Near-Infrared Spectroscopy  
Study. *J Neurotrauma* 2018;35:1224-1232.

17. Gardner RC, Yaffe K. Epidemiology of mild traumatic brain injury and  
neurodegenerative disease. *Mol Cell Neurosci* 2015;66:75-80.

18. Stiell IG, Clement CM, Grimshaw JM, et al. A prospective cluster-randomized trial to  
implement the Canadian CT Head Rule in emergency departments. *CMAJ* 2010;182:1527-  
1532.

19. Tellier A, Marshall SC, Wilson KG, et al. The heterogeneity of mild traumatic brain injury: Where do we stand? *Brain Inj* 2009;23:879-887.
20. Meares S, Shores EA, Smyth T, et al. Identifying posttraumatic amnesia in individuals with a Glasgow Coma Scale of 15 after mild traumatic brain injury. *Arch Phys Med Rehabil* 2015;96:956-959.
21. Meares S, Shores EA, Taylor AJ, et al. Validation of the Abbreviated Westmead Post-traumatic Amnesia Scale: a brief measure to identify acute cognitive impairment in mild traumatic brain injury. *Brain Inj* 2011;25:1198-1205.
22. Watson C, Clous E, Jaeger M, et al. Introduction of the Abbreviated Westmead Post-Traumatic Amnesia Scale and impact on length of stay. *Scand J Surg* 2017;106:356-360.
23. Bosch M, McKenzie JE, Ponsford JL, et al. Evaluation of a targeted, theory-informed implementation intervention designed to increase uptake of emergency management recommendations regarding adult patients with mild traumatic brain injury: results of the NET cluster randomised trial. *Implement Sci* 2019;14:4.
24. Pozzato I, Cameron ID, Meares S, et al. A surveillance study to determine the accuracy of mild traumatic brain injury diagnosis in an emergency department: protocol for a retrospective cohort study. *BMJ Open* 2017;7:e016222.
25. Korley FK, Diaz-Arrastia R, Falk HJ, et al. Prevalence of incomplete functional and symptomatic recovery among patients with head injury but brain injury debatable. *J Neurotrauma* 2017;34:1531-1538.
26. Voss JD, Connolly J, Schwab KA, et al. Update on the epidemiology of concussion/mild traumatic brain injury. *Curr Pain Headache Rep* 2015;19:32.
27. Bazarian JJ, Veazie P, Mookerjee S, et al. Accuracy of mild traumatic brain injury case ascertainment using ICD-9 codes. *Acad Emerg Med* 2006;13:31-38.

- 1  
2  
3 28. Cassidy JD, Boyle E, Carroll LJ. Population-based, inception cohort study of the  
4 incidence, course, and prognosis of mild traumatic brain injury after motor vehicle collisions.  
5  
6 *Arch Phys Med Rehabil* 2014;95:S278-S285.  
7  
8  
9  
10 29. Brennan JH, Bernard S, Cameron PA, et al. Ethanol and isolated traumatic brain injury.  
11  
12 *J Clin Neurosci* 2015;22:1375-1381.  
13  
14  
15 30. Luoto TM, Tenovuo O, Kataja A, et al. Who gets recruited in mild traumatic brain  
16 injury research? *J Neurotrauma* 2013;30:11-16.  
17  
18  
19 31. Yue JK, Ngwenya LB, Upadhyayula PS, et al. Emergency department blood alcohol  
20 level associates with injury factors and six-month outcome after uncomplicated mild traumatic  
21 brain injury. *J Clin Neurosci* 2017;45:293-298.  
22  
23  
24  
25  
26 32. Yue JK, Yuh EL, Korley FK, et al. Association between plasma GFAP concentrations  
27 and MRI abnormalities in patients with CT-negative traumatic brain injury in the TRACK-TBI  
28 cohort: a prospective multicentre study. *Lancet Neurol* 2019;18:953-961.  
29  
30  
31  
32  
33 33. Sharpe S, Kool B, Shepherd M, et al. Mild traumatic brain injury: improving quality of  
34 care in the paediatric emergency department setting. *J Paediatr Child Health* 2012;48:170-176.  
35  
36  
37  
38  
39  
40  
41  
42  
43  
44  
45  
46  
47  
48  
49  
50  
51  
52  
53  
54  
55  
56  
57  
58  
59  
60

**Table 1.** Clinical features of mTBI diagnosis (confirmed mTBI, N=351; indeterminate mTBI, N=180) who presented to ED, illustrated by WHO diagnostic criteria and secondary criteria

|                                      | <b>Confirmed<br/>mTBI<br/>[WHO<br/>criteria]<br/>(N=351)N (%)</b> | <b>Indeterminate<br/>mTBI<br/>[Secondary<br/>criteria]<br/>(N=180)N (%)</b> | <b>Statistical<br/>comparison<br/><br/>p values§</b> |
|--------------------------------------|-------------------------------------------------------------------|-----------------------------------------------------------------------------|------------------------------------------------------|
| <b>mTBI WHO criteria</b>             |                                                                   |                                                                             |                                                      |
| <b>(i) Level of consciousness</b>    |                                                                   |                                                                             |                                                      |
| Initial GCS at the scene/ED triage   |                                                                   |                                                                             |                                                      |
| 15 points                            | 232 (66.1)                                                        | 180 (100)                                                                   |                                                      |
| 14 points                            | 103 (29.2)                                                        | -                                                                           |                                                      |
| 13 points                            | 14 (4)                                                            | -                                                                           |                                                      |
| Missing                              | 2 (0.57)                                                          | -                                                                           |                                                      |
| LOC ≤ 30 mins                        |                                                                   |                                                                             |                                                      |
| No                                   | 71 (20.2)                                                         | -                                                                           |                                                      |
| Yes (witnessed/self-reported)        | 185 (52.7)                                                        | -                                                                           |                                                      |
| Missing                              | 50 (14.2)                                                         | -                                                                           |                                                      |
| <b>(ii) Confusion/Disorientation</b> |                                                                   |                                                                             |                                                      |
|                                      | 97 (27.6)                                                         | -                                                                           |                                                      |
| <b>(iii) Amnesia &lt; 24 hours</b>   |                                                                   |                                                                             |                                                      |
| No                                   | 40 (11.4)                                                         | -                                                                           |                                                      |

|                                        |            |            |        |
|----------------------------------------|------------|------------|--------|
| Yes (observed/self-reported)           | 229 (65.2) | -          |        |
| Missing                                | 78 (22.2)  | -          |        |
| (iv) Intracranial injuries on brain CT | 31 (8.8)   | -          |        |
| Multiple mTBI WHO criteria             | 186 (53)   | -          |        |
| <b>mTBI Secondary criteria</b>         |            |            |        |
| Queried LOC                            | 45 (12.8)  | 12 (6.7)   | <0.05  |
| Queried amnesia                        | 4 (1.1)    | 3 (1.7)    | 0.564  |
| PTA testing w/ optimal scores          | 32 (9.1)   | 45 (25)    | <0.001 |
| Post-concussion symptoms #             | 183 (52.1) | 133 (73.9) | <0.001 |
| <i>Headache</i>                        | 149 (42.4) | 128 (71.1) |        |
| <i>Nausea/ Vomiting</i>                | 103 (29.3) | 79 (43.9)  |        |
| <i>Dizziness</i>                       | 44 (12.5)  | 58 (32.2)  |        |
| <i>Fatigue</i>                         | 2 (0.6)    | 1 (0.6)    |        |
| <i>Memory problems</i>                 | 5 (1.4)    | 1 (0.6)    |        |
| <i>Concentration problems</i>          | 4 (1.1)    | 2 (1.1)    |        |
| <i>Other</i>                           | 81 (23.1)  | 78(43.3)   |        |
| Transient neurological abnormalities#  | 28 (8)     | 22 (12.2)  |        |
| Multiple mTBI secondary criteria       | -          | 32 (17.8)  |        |

TBI: Traumatic brain injury; WHO: World Health Organization; GCS: Glasgow Coma Scale; ED: Emergency department; LOC: Loss of consciousness; CT: Computer Tomography; PTA: Post-traumatic amnesia; A-WPTAS: Abbreviated Westmead Post Traumatic-Amnesia Scale; WPTAS: Westmead Post-Traumatic Amnesia.

† Proportion of valid cases.

§  $\chi^2$ , z-test, t-test.

Note: The data contains occasional missing data values, which are assumed to be random.

For peer review only

**Table 2.** Socio-demographic and injury-related information of identified cases with a confirmed mTBI diagnosis (N=351) and indeterminate mTBI diagnosis (N=180) who presented to ED.

|                               | <b>Confirmed<br/>mTBI<br/>[WHO<br/>criteria]<br/>(N=351)</b> | <b>Indeterminate<br/>mTBI<br/>[Secondary<br/>criteria]<br/>(N=180)</b> | <b>Statistical<br/>comparison<br/><br/>p values§</b> |
|-------------------------------|--------------------------------------------------------------|------------------------------------------------------------------------|------------------------------------------------------|
| <b>Socio-demographics</b>     |                                                              |                                                                        |                                                      |
| <b>Age (years), mean (SD)</b> | 39.9 (14.2)                                                  | 36.1 (13.1)                                                            | <0.01                                                |
| [median, IQR]                 | [40.8, 26.5-<br>52]                                          | [34.7, 24.1-<br>44.5]                                                  |                                                      |
| <b>Age groups (years)</b>     |                                                              |                                                                        |                                                      |
| 18-24                         | 71 (20.2)                                                    | 52 (28.9)                                                              | 0.02                                                 |
| 25-29                         | 38 (10.8)                                                    | 15 (8.3)                                                               | 0.36                                                 |
| 30-34                         | 36 (10.3)                                                    | 26 (14.4)                                                              | 0.16                                                 |
| 35-39                         | 24 (6.8)                                                     | 19 (10.6)                                                              | 0.13                                                 |
| 40-44                         | 44 (12.5)                                                    | 24 (13.3)                                                              | 0.79                                                 |
| 45-49                         | 34 (9.7)                                                     | 12 (6.7)                                                               | 0.24                                                 |
| 50-54                         | 44 (12.5)                                                    | 9 (5)                                                                  | <0.01                                                |
| 55-59                         | 25 (7.1)                                                     | 11 (6.1)                                                               | 0.66                                                 |
| 60-65                         | 35 (10)                                                      | 12 (6.7)                                                               | 0.21                                                 |



|                                            |            |            |  |        |
|--------------------------------------------|------------|------------|--|--------|
| <b>Sex</b>                                 |            |            |  | <0.001 |
| Male                                       | 254 (72.4) | 90 (50)    |  |        |
| Female                                     | 97 (27.6)  | 90 (50)    |  |        |
| <b>Country of birth</b>                    |            |            |  | 0.50   |
| Australia                                  | 230 (65.5) | 113 (62.8) |  |        |
| Other                                      | 118 (33.6) | 66 (36.7)  |  |        |
| <b>Language spoken at home</b>             |            |            |  | 0.11   |
| English                                    | 334 (95.2) | 165 (91.7) |  |        |
| Other                                      | 17 (4.8)   | 15 (8.3)   |  |        |
| <b>Marital status</b>                      |            |            |  | 0.11   |
| Married/Defacto                            | 171 (48.7) | 83 (46.1)  |  |        |
| Other                                      | 180 (51.3) | 97 (53.9)  |  |        |
| <b>Mental health history<sup>†</sup></b>   | 61 (17.4)  | 23 (12.8)  |  | 0.17   |
| <b>Substance abuse history<sup>†</sup></b> | 36 (10.2)  | 1 (0.5)    |  |        |
| <b>Injury-related details</b>              |            |            |  |        |
| <b>Injury Mechanism</b>                    |            |            |  | 0.35   |
| Fall                                       | 137 (39)   | 56 (31.1)  |  |        |
| Assault                                    | 27 (7.7)   | 14 (7.8)   |  |        |
| Work                                       | 9 (2.6)    | 7 (3.9)    |  |        |
| Sport                                      | 52 (14.8)  | 25 (13.9)  |  |        |
| Other                                      | 27 (7.7)   | 34 (18.9)  |  |        |
| <b>Motor vehicle crash</b>                 | 99 (28.2)  | 44 (24.4)  |  | <0.01  |
| <i>Driver</i>                              | 28 (28.3)  | 15 (34.1)  |  |        |
| <i>Passenger</i>                           | 6 (6.1)    | 6 (13.6)   |  |        |

|    |                                                |            |            |        |
|----|------------------------------------------------|------------|------------|--------|
| 1  |                                                |            |            |        |
| 2  |                                                |            |            |        |
| 3  | <i>Motorbike rider</i>                         | 8 (8.1)    | 10 (22.7)  |        |
| 4  |                                                |            |            |        |
| 5  | <i>Bicyclist</i>                               | 44 (44.4)  | 5 (11.4)   |        |
| 6  |                                                |            |            |        |
| 7  | <i>Pedestrian</i>                              | 10 (10.1)  | 5 (11.4)   |        |
| 8  |                                                |            |            |        |
| 9  | <i>Other</i>                                   | 3 (3)      | 3 (6.8)    |        |
| 10 |                                                |            |            |        |
| 11 |                                                |            |            |        |
| 12 | <b>Reported impact to the head</b>             |            |            | <0.001 |
| 13 |                                                |            |            |        |
| 14 | No                                             | 2 (0.6)    | 1 (0.5)    |        |
| 15 |                                                |            |            |        |
| 16 | Yes                                            | 269 (76.6) | 164 (91.1) |        |
| 17 |                                                |            |            |        |
| 18 | Missing                                        | 80 (22.8)  | 15 (8.3)   |        |
| 19 |                                                |            |            |        |
| 20 |                                                |            |            |        |
| 21 | <b>Associated injury types†</b>                |            |            |        |
| 22 |                                                |            |            |        |
| 23 | Soft tissue laceration                         | 165 (47)   | 55 (30.6)  | <0.001 |
| 24 |                                                |            |            |        |
| 25 | Fracture                                       | 87 (24.8)  | 24 (13.3)  | <0.01  |
| 26 |                                                |            |            |        |
| 27 | Ligamentous                                    | 2 (0.6)    | 2 (1.1)    | 0.49   |
| 28 |                                                |            |            |        |
| 29 | Dislocation                                    | 3 (0.8)    | 0          | 0.21   |
| 30 |                                                |            |            |        |
| 31 | Abrasion, superficial wound, contusion         | 158 (45)   | 83 (46.1)  | 0.81   |
| 32 |                                                |            |            |        |
| 33 | <b>Multiple injury types</b>                   | 105 (29.9) | 29 (16.1)  |        |
| 34 |                                                |            |            |        |
| 35 | <b>Alcohol/drug use at the time of injury†</b> | 127 (36.2) | 19 (10.6)  | <0.001 |
| 36 |                                                |            |            |        |
| 37 |                                                |            |            |        |
| 38 |                                                |            |            |        |
| 39 |                                                |            |            |        |

TBI: Traumatic brain injury; ED: Emergency department.

† Proportion of valid cases.

§  $\chi^2$ , z-test, t-test.

Note: The data contains occasional missing data values, which are assumed to be random.

**Table 3.** Acute hospital management details of identified cases with a confirmed mTBI diagnosis (N=351) and indeterminate mTBI diagnosis (N=180) who presented to ED.

|                                              | <b>Confirmed<br/>mTBI<br/>[WHO<br/>criteria]<br/>(N=351)N (%)</b> | <b>Indeterminate<br/>mTBI<br/>[Secondary<br/>criteria]<br/>(N=180)N (%)</b> | <b>Statistical<br/>comparison<br/>p values§</b> |
|----------------------------------------------|-------------------------------------------------------------------|-----------------------------------------------------------------------------|-------------------------------------------------|
| <b>ED management details</b>                 |                                                                   |                                                                             |                                                 |
| <b>ED arrival mode</b>                       |                                                                   |                                                                             | <0.001                                          |
| By ambulance                                 | 250 (71.2)                                                        | 56 (31.1)                                                                   |                                                 |
| Other                                        | 101 (28.8)                                                        | 124 (68.9)                                                                  |                                                 |
| <b>Triage category</b>                       |                                                                   |                                                                             | <0.001                                          |
| 1. Seen immediately                          | 24 (6.8)                                                          | 4 (2.2)                                                                     |                                                 |
| 2. Within 10 minutes                         | 170 (48.4)                                                        | 42 (23.3)                                                                   |                                                 |
| 3. Within 30 minutes                         | 116 (33.1)                                                        | 64 (35.6)                                                                   |                                                 |
| 4. Within 1 hour                             | 40 (11.4)                                                         | 69 (38.3)                                                                   |                                                 |
| 5. Within 2 hours                            | 1 (0.3)                                                           | 1 (0.6)                                                                     |                                                 |
| <b>Intubation<sup>†</sup></b>                | 1 (0.3)                                                           | 0                                                                           | 0.47                                            |
| <b>ICU admission<sup>†</sup></b>             | 7 (2)                                                             | 1 (0.6)                                                                     | 0.19                                            |
| <b>Length of ED stay (hrs), median (IQR)</b> | 5.8 (4-8.6)                                                       | 3.8 (2.6-5.7)                                                               | <0.001                                          |

|    |                                                |                  |                 |        |
|----|------------------------------------------------|------------------|-----------------|--------|
| 1  |                                                |                  |                 |        |
| 2  |                                                |                  |                 |        |
| 3  | <b>Length of hospital stay</b> (days), median  | 3.4 (1.9-6.5)    | 2 (0.9-7.9)     |        |
| 4  |                                                |                  |                 |        |
| 5  | (IQR)                                          |                  |                 |        |
| 6  |                                                |                  |                 |        |
| 7  |                                                |                  |                 |        |
| 8  | <b>Discharge destination</b>                   |                  |                 | <0.001 |
| 9  |                                                |                  |                 |        |
| 10 | Discharged home                                | 133 (37.9)       | 127 (70.6)      |        |
| 11 |                                                |                  |                 |        |
| 12 | Admitted to ED                                 | 121 (34.5)       | 36 (20)         |        |
| 13 |                                                |                  |                 |        |
| 14 | Admitted to ward                               | 97 (27.6)        | 17 (9.4)        |        |
| 15 |                                                |                  |                 |        |
| 16 |                                                |                  |                 |        |
| 17 | <b>Location of initial GCS<sup>†</sup></b>     |                  |                 | <0.001 |
| 18 |                                                |                  |                 |        |
| 19 | At the scene 30-min post-injury                | 216 (61.5)       | 52 (28.9)       |        |
| 20 |                                                |                  |                 |        |
| 21 | At ED presentation                             | 130 (37)         | 127 (70.6)      |        |
| 22 |                                                |                  |                 |        |
| 23 |                                                |                  |                 |        |
| 24 | <b>Brain CT performed<sup>†</sup></b>          | 266 (75.8)       | 73 (40.6)       | <0.001 |
| 25 |                                                |                  |                 |        |
| 26 | <b>PTA measured<sup>†</sup></b>                | 182 (51.9)       | 46 (25.6)       | <0.001 |
| 27 |                                                |                  |                 |        |
| 28 | A-WPTAS                                        | 169 (92.8)       | 44 (95.6)       |        |
| 29 |                                                |                  |                 |        |
| 30 | WPTAS                                          | 19 (10.4)        | 2 (4.4)         |        |
| 31 |                                                |                  |                 |        |
| 32 |                                                |                  |                 |        |
| 33 | <b>Location of PTA testing</b>                 | ( <i>N</i> =182) | ( <i>N</i> =46) |        |
| 34 |                                                |                  |                 |        |
| 35 | In ED                                          | 166 (91.2)       | 44 (95.6)       | 0.364  |
| 36 |                                                |                  |                 |        |
| 37 | In ward                                        | 28 (15.4)        | 2 (4.4)         | <0.05  |
| 38 |                                                |                  |                 |        |
| 39 |                                                |                  |                 |        |
| 40 | <b>Time to PTA testing</b> (hrs), median (IQR) | 3.7 (2.3-6.1)    | 2.5 (1.7-4.9)   | <0.05  |
| 41 |                                                |                  |                 |        |
| 42 | <b>PTA classification based on PTA testing</b> | ( <i>N</i> =182) | ( <i>N</i> =46) | <0.001 |
| 43 |                                                |                  |                 |        |
| 44 | Optimal scores/Did not fail                    | 32 (17.8)        | 40 (87)         |        |
| 45 |                                                |                  |                 |        |
| 46 | 6-30 minutes                                   | 2 (1.1)          | -               |        |
| 47 |                                                |                  |                 |        |
| 48 | 31-60 minutes                                  | 1 (0.1)          | -               |        |
| 49 |                                                |                  |                 |        |
| 50 | >1-12 hours                                    | 106 (58.4)       | -               |        |
| 51 |                                                |                  |                 |        |
| 52 | >12-24 hours                                   | 4 (2.2)          | -               |        |
| 53 |                                                |                  |                 |        |
| 54 | Unknown/incomplete/missing                     | 37 (20.4)        | 6 (13)          |        |
| 55 |                                                |                  |                 |        |
| 56 |                                                |                  |                 |        |
| 57 |                                                |                  |                 |        |
| 58 |                                                |                  |                 |        |
| 59 |                                                |                  |                 |        |
| 60 |                                                |                  |                 |        |

|                                                  |            |            |        |
|--------------------------------------------------|------------|------------|--------|
| <b>Head Injury advice given<sup>†</sup></b>      | 166 (47.3) | 120 (66.7) | <0.001 |
| <b>Follow-up recommendations</b>                 | 128 (36.5) | 43 (23.9)  | <0.01  |
| <b>Representations to ED (within 1 mth)</b>      | 13 (3.7)   | 8 (4.4)    |        |
| <b>Recorded mTBI diagnosis in the ED records</b> |            |            | 0.47   |
| No                                               | 269 (76.9) | 146 (81.1) |        |
| Yes                                              | 81 (23.1)  | 34 (18.9)  |        |

TBI: Traumatic brain injury; GCS: Glasgow Coma Scale; ED: Emergency department; ICU: Intensive care unit; LOC: Loss of consciousness; PTA: Post-traumatic amnesia; A-WPTAS: Abbreviated Westmead Post-Traumatic Amnesia Scale; WPTAS: Westmead Post-Traumatic Amnesia.

<sup>†</sup> Proportion of valid cases.

<sup>§</sup>  $\chi^2$ , z-test, t-test.

Note: The data contains occasional missing data values, which are assumed to be random

**Table 4.** Top 25 ED diagnosis codes (SNOWMED codes) and ED diagnosis codes indicative of mTBI, for the overall mTBI cohort (confirmed mTBI cases, N=351; indeterminate mTBI, N=180)

| Top 25 ED Diagnosis Codes Description                 | N   | %    |
|-------------------------------------------------------|-----|------|
| Injury of head (disorder)                             | 145 | 26.3 |
| Motor vehicle accident victim (finding)               | 49  | 8.9  |
| Minor head injury (disorder)                          | 39  | 7.1  |
| Traumatic injury (disorder)                           | 37  | 6.7  |
| Falls (finding)                                       | 35  | 6.4  |
| Concussion (disorder)                                 | 26  | 4.7  |
| Headache (finding)                                    | 11  | 2.0  |
| Facial laceration (disorder)                          | 10  | 1.8  |
| Victim of physical assault (finding)                  | 9   | 1.6  |
| Alcohol intoxication (disorder)                       | 8   | 1.5  |
| Falling injury (finding)                              | 8   | 1.5  |
| Fractured nasal bones (disorder)                      | 8   | 1.5  |
| Laceration of head (disorder)                         | 8   | 1.5  |
| Post-concussion syndrome (disorder)                   | 7   | 1.3  |
| Injury of face (disorder)                             | 6   | 1.1  |
| Subarachnoid haemorrhage (disorder)                   | 6   | 1.1  |
| Neck pain (finding)                                   | 5   | 0.9  |
| Backache                                              | 4   | 0.7  |
| Intracranial injury without skull fracture (disorder) | 4   | 0.7  |

|                                                               |          |          |
|---------------------------------------------------------------|----------|----------|
| Laceration of forehead (disorder)                             | 4        | 0.7      |
| Closed fracture of clavicle (disorder)                        | 3        | 0.5      |
| Dizziness (finding)                                           | 3        | 0.5      |
| Fracture of maxilla (disorder)                                | 3        | 0.5      |
| Fracture of rib (disorder)                                    | 3        | 0.5      |
| Injury of neck (disorder)                                     | 3        | 0.5      |
| <b>ED Diagnosis Codes indicative of mTBI</b>                  | <b>N</b> | <b>%</b> |
| Concussion (disorder)                                         | 26       | 4.7      |
| Post-concussion syndrome (disorder)                           | 7        | 1.3      |
| Subarachnoid haemorrhage (disorder)                           | 6        | 1.1      |
| Intracranial injury without skull fracture (disorder)         | 4        | 0.7      |
| Subdural hematoma (disorder)                                  | 3        | 0.5      |
| Brief loss of consciousness (finding)                         | 2        | 0.4      |
| Cerebral haemorrhage (disorder)                               | 1        | 0.2      |
| Contusion of cerebrum (disorder)                              | 1        | 0.2      |
| Crushing injury of skull and intracranial contents (disorder) | 1        | 0.2      |
| Epidural haemorrhage (disorder)                               | 1        | 0.2      |
| Intracranial haemorrhage (disorder)                           | 1        | 0.2      |
| Loss of consciousness (finding)                               | 1        | 0.2      |
| Transient global amnesia (finding)                            | 1        | 0.2      |
| Traumatic subdural haemorrhage (disorder)                     | 1        | 0.2      |

## FIGURE LEGENDS

**Figure 1.** Study recruitment flowchart.

## LIST OF SUPPLEMENTAL DIGITAL CONTENT

Supplemental Material Content 1, (Table S1). WHO criteria distribution among the identified cohort of confirmed mTBI cases (N=351).

Supplemental Material Content 2, (Table S2). Confirmed mTBI patients (N=351) with documented PTA (N=260) based on the summary PTA-related mTBI designation, accounting for any documented PTA manifestations: observed/self-reported amnesia or confusion/disorientation fulfilling the WHO criteria, behavioural change or acute cognitive impairment on PTA testing.

Supplemental Material Content 3, (Table S3). Full list of ED diagnosis codes (SNOWMED codes) and ED diagnosis codes indicative of mTBI, for the overall mTBI cohort (confirmed mTBI cases, N=351; indeterminate mTBI, N=180).

Supplemental Material Content 4, (Table S4). Significant differences ( $p < .05$ ) between people with and without recorded mTBI diagnosis in Emergency Department (ED) records and/or ED discharge codes indicative of mild traumatic brain injury (mTBI), among confirmed mTBI cases (N=351).



1  
2  
3 Supplemental Material Content 5, (Table S5). Significant differences ( $p < .05$ ) between people  
4 tested for Post-traumatic Amnesia (PTA) versus those not tested, among confirmed mild  
5  
6 traumatic brain injury (mTBI) (N=351) and indeterminate cases (N=180).  
7  
8  
9  
10

11  
12  
13 Supplemental Material Content 6, (Figure S1). Percent of screened ED presentations aged 18-  
14  
15 65 years with confirmed or indeterminate mTBI (total 30 479 screened, 351 confirmed mTBI  
16  
17 (1.15%), 180 indeterminate mTBI (0.6%).  
18  
19  
20  
21  
22  
23  
24  
25  
26  
27  
28  
29  
30  
31  
32  
33  
34  
35  
36  
37  
38  
39  
40  
41  
42  
43  
44  
45  
46  
47  
48  
49  
50  
51  
52  
53  
54  
55  
56  
57  
58  
59  
60

1  
2  
3  
4  
5  
6  
7  
8  
9  
10  
11  
12  
13  
14  
15  
16  
17  
18  
19  
20  
21  
22  
23  
24  
25  
26  
27  
28  
29  
30  
31  
32  
33  
34  
35  
36  
37  
38  
39  
40  
41  
42  
43  
44  
45  
46  
47  
48  
49  
50  
51  
52  
53  
54  
55  
56  
57  
58  
59  
60

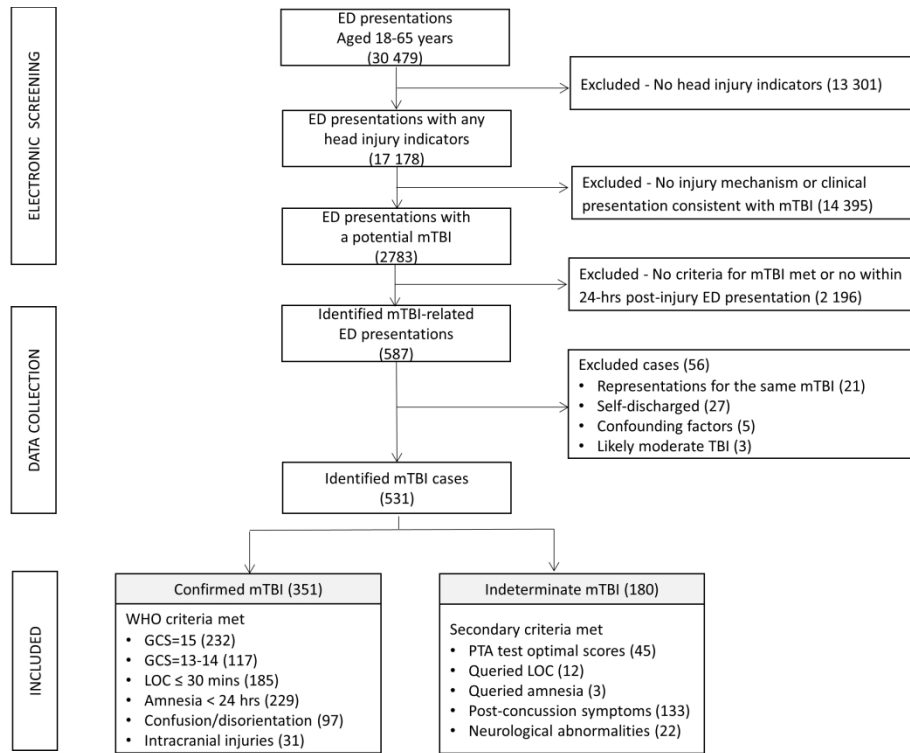

Figure 1. Study recruitment flowchart.

254x190mm (300 x 300 DPI)

**Table S1.** WHO criteria distribution among the identified cohort of confirmed mTBI cases (N=351).

| <b>GCS</b>     | <b>LOC</b>       | <b>Amnesia</b>     | <b>Confusion/<br/>disorientation</b> | <b>Intracranial<br/>injuries</b> | <b>N</b>       | <b>%</b> |
|----------------|------------------|--------------------|--------------------------------------|----------------------------------|----------------|----------|
| <b>=13-14</b>  | <b>≤ 30 mins</b> | <b>&lt; 24 hrs</b> |                                      |                                  |                |          |
| <b>(N=117)</b> | <b>(N=185)</b>   | <b>(N=229)</b>     | <b>(N=97)</b>                        | <b>(N=31)</b>                    | <b>(N=351)</b> |          |
| ✓              | ✓                | ✓                  | ✓                                    | ✓                                | 2              | 0.9      |
| ✓              | ✓                | ✓                  | ✓                                    |                                  | 18             | 5.1      |
| ✓              | ✓                | ✓                  |                                      | ✓                                | 5              | 1.4      |
| ✓              | ✓                | ✓                  |                                      |                                  | 10             | 2.8      |
| ✓              | ✓                |                    | ✓                                    |                                  | 6              | 1.7      |
| ✓              | ✓                |                    |                                      |                                  | 6              | 1.7      |
| ✓              |                  | ✓                  | ✓                                    | ✓                                | 4              | 1.1      |
| ✓              |                  | ✓                  | ✓                                    |                                  | 32             | 9.1      |
| ✓              |                  | ✓                  |                                      | ✓                                | 2              | 0.6      |
| ✓              |                  | ✓                  |                                      |                                  | 17             | 4.8      |
| ✓              |                  |                    | ✓                                    |                                  | 2              | 0.6      |
| ✓              |                  |                    |                                      |                                  | 13             | 3.7      |
|                | ✓                | ✓                  | ✓                                    | ✓                                | 1              | 0.3      |
|                | ✓                | ✓                  | ✓                                    |                                  | 9              | 2.6      |
|                | ✓                | ✓                  |                                      | ✓                                | 1              | 0.3      |
|                | ✓                | ✓                  |                                      |                                  | 51             | 14.4     |
|                | ✓                |                    | ✓                                    | ✓                                | 1              | 0.3      |
|                | ✓                |                    | ✓                                    |                                  | 4              | 1.1      |

|    |   |   |   |   |    |      |
|----|---|---|---|---|----|------|
| 1  |   |   |   |   |    |      |
| 2  |   |   |   |   |    |      |
| 3  | ✓ |   |   | ✓ | 3  | 0.8  |
| 4  |   |   |   |   |    |      |
| 5  | ✓ |   |   |   | 68 | 19.4 |
| 6  |   |   |   |   |    |      |
| 7  |   |   |   |   |    |      |
| 8  |   | ✓ | ✓ | ✓ | 1  | 0.3  |
| 9  |   |   |   |   |    |      |
| 10 |   | ✓ | ✓ |   | 8  | 2.3  |
| 11 |   |   |   |   |    |      |
| 12 |   | ✓ |   | ✓ | 2  | 0.6  |
| 13 |   |   |   |   |    |      |
| 14 |   | ✓ |   |   | 66 | 18.7 |
| 15 |   |   |   |   |    |      |
| 16 |   |   |   |   |    |      |
| 17 |   |   | ✓ |   | 10 | 2.8  |
| 18 |   |   |   |   |    |      |
| 19 |   |   |   | ✓ | 9  | 2.6  |
| 20 |   |   |   |   |    |      |

---

WHO: World Health Organization; TBI: Traumatic brain injury; GCS: Glasgow Coma Scale;

LOC: Loss of consciousness.

**Table S2.** Confirmed mTBI patients (N=351) with documented PTA (N=260) based on the summary PTA-related mTBI designation, accounting for any documented PTA manifestations: observed/self-reported amnesia or confusion/disorientation fulfilling the WHO criteria, behavioural change or acute cognitive impairment on PTA testing.

| Summary                                | Observed/self-reported                  | Observed/self-reported                         | Observed Behavioural changes | PTA testing administered | N       | %    |
|----------------------------------------|-----------------------------------------|------------------------------------------------|------------------------------|--------------------------|---------|------|
| PTA-related mTBI designation n (N=260) | Amnesia < 24 hrs [WHO criteria] (N=229) | Confusion/disorientation [WHO criteria] (N=97) | (N=61)                       | (N=182)                  | (N=351) |      |
| ✓                                      | ✓                                       | ✓                                              | ✓                            | ✓                        | 27      | 7.7  |
| ✓                                      | ✓                                       | ✓                                              | ✓                            | -                        | 6       | 1.7  |
| ✓                                      | ✓                                       | ✓                                              | -                            | ✓                        | 24      | 6.8  |
| ✓                                      | ✓                                       | ✓                                              | -                            | -                        | 18      | 5.1  |
| ✓                                      | ✓                                       | -                                              | ✓                            | ✓                        | 16      | 4.6  |
| ✓                                      | ✓                                       | -                                              | ✓                            | -                        | 6       | 1.7  |
| ✓                                      | ✓                                       | -                                              | -                            | ✓                        | 75      | 21.4 |
| ✓                                      | ✓                                       | -                                              | -                            | -                        | 57      | 16.2 |
| ✓                                      | -                                       | ✓                                              | ✓                            | ✓                        | 4       | 1.1  |
| ✓                                      | -                                       | ✓                                              | -                            | ✓                        | 6       | 1.7  |
| ✓                                      | -                                       | ✓                                              | -                            | -                        | 12      | 3.4  |

|    |   |   |   |   |    |                      |            |
|----|---|---|---|---|----|----------------------|------------|
| 1  |   |   |   |   |    |                      |            |
| 2  |   |   |   |   |    |                      |            |
| 3  | ✓ | - | - | ✓ | ✓  | <b>1</b>             | <b>0.3</b> |
| 4  |   |   |   |   |    |                      |            |
| 5  | ✓ | - | - | ✓ |    | <b>1<sup>^</sup></b> | <b>0.3</b> |
| 6  |   |   |   |   |    |                      |            |
| 7  | ✓ | - | - | - | ✓  | <b>7</b>             | <b>2</b>   |
| 8  |   |   |   |   |    |                      |            |
| 9  |   |   |   |   |    |                      |            |
| 10 | - | - | - | - | ✓§ | 20#                  | 5.8        |
| 11 |   |   |   |   |    |                      |            |
| 12 | - | - | - | - | -  | 71#                  | 20.        |
| 13 |   |   |   |   |    |                      |            |
| 14 |   |   |   |   |    |                      |            |
| 15 |   |   |   |   |    |                      | 2          |
| 16 |   |   |   |   |    |                      |            |

---

TBI: Traumatic brain injury; WHO: World Health Organization; PTA: Post-traumatic amnesia

Note: in **bold** are confirmed mTBI (N=9) based only on reported behavioural changes and/or cognitive impairment at PTA testing (i.e. PTA documented). All, except one (<sup>^</sup>), met other mTBI WHO criteria (i.e. LOC ≤ 30 mins, GCS=13-14, intracranial injuries).

# Confirmed mTBI (N=91) with no documented positive findings for PTA manifestations.

§ Individuals who were tested for PTA and obtained optimal scores (i.e. not in PTA), in the absence of PTA manifestations documented in other sources.

**Table S3.** Full list of ED diagnosis codes (SNOWMED codes) and ED diagnosis codes indicative of mTBI, for the overall mTBI cohort (confirmed mTBI cases, N=351; indeterminate mTBI, N=180).

| SNOWMED Codes | Diagnosis Description                                 | N   | %    |
|---------------|-------------------------------------------------------|-----|------|
|               | Injury of head (disorder)                             | 145 | 26.3 |
|               | Motor vehicle accident victim (finding)               | 49  | 8.9  |
|               | Minor head injury (disorder)                          | 39  | 7.1  |
|               | Traumatic injury (disorder)                           | 37  | 6.7  |
|               | Falls (finding)                                       | 35  | 6.4  |
|               | Concussion (disorder)                                 | 26  | 4.7  |
|               | Headache (finding)                                    | 11  | 2.0  |
|               | Facial laceration (disorder)                          | 10  | 1.8  |
|               | Victim of physical assault (finding)                  | 9   | 1.6  |
|               | Alcohol intoxication (disorder)                       | 8   | 1.5  |
|               | Falling injury (finding)                              | 8   | 1.5  |
|               | Fractured nasal bones (disorder)                      | 8   | 1.5  |
|               | Laceration of head (disorder)                         | 8   | 1.5  |
|               | Postconcussion syndrome (disorder)                    | 7   | 1.3  |
|               | Injury of face (disorder)                             | 6   | 1.1  |
|               | Subarachnoid hemorrhage (disorder)                    | 6   | 1.1  |
|               | Neck pain (finding)                                   | 5   | 0.9  |
|               | Backache                                              | 4   | 0.7  |
|               | Intracranial injury without skull fracture (disorder) | 4   | 0.7  |
|               | Laceration of forehead (disorder)                     | 4   | 0.7  |
|               | Closed fracture of clavicle (disorder)                | 3   | 0.5  |

|    |                                                                    |   |     |
|----|--------------------------------------------------------------------|---|-----|
| 1  |                                                                    |   |     |
| 2  |                                                                    |   |     |
| 3  | Dizziness (finding)                                                | 3 | 0.5 |
| 4  |                                                                    |   |     |
| 5  | Fracture of maxilla (disorder)                                     | 3 | 0.5 |
| 6  |                                                                    |   |     |
| 7  | Fracture of rib (disorder)                                         | 3 | 0.5 |
| 8  |                                                                    |   |     |
| 9  |                                                                    |   |     |
| 10 | Injury of neck (disorder)                                          | 3 | 0.5 |
| 11 |                                                                    |   |     |
| 12 | Laceration - injury (disorder)                                     | 3 | 0.5 |
| 13 |                                                                    |   |     |
| 14 | Soft tissue injury (disorder)                                      | 3 | 0.5 |
| 15 |                                                                    |   |     |
| 16 |                                                                    |   |     |
| 17 | Subdural hematoma (disorder)                                       | 3 | 0.5 |
| 18 |                                                                    |   |     |
| 19 | -                                                                  | 2 | 0.4 |
| 20 |                                                                    |   |     |
| 21 | Abrasion of face (disorder)                                        | 2 | 0.4 |
| 22 |                                                                    |   |     |
| 23 | Abrasion of head (disorder)                                        | 2 | 0.4 |
| 24 |                                                                    |   |     |
| 25 |                                                                    |   |     |
| 26 | Alcohol abuse (disorder)                                           | 2 | 0.4 |
| 27 |                                                                    |   |     |
| 28 | Brief loss of consciousness (finding)                              | 2 | 0.4 |
| 29 |                                                                    |   |     |
| 30 |                                                                    |   |     |
| 31 | Closed fracture of facial bone (disorder)                          | 2 | 0.4 |
| 32 |                                                                    |   |     |
| 33 | Fracture of cervical spine (disorder)                              | 2 | 0.4 |
| 34 |                                                                    |   |     |
| 35 | Fracture of face bones (disorder)                                  | 2 | 0.4 |
| 36 |                                                                    |   |     |
| 37 | Fracture of phalanx of finger (disorder)                           | 2 | 0.4 |
| 38 |                                                                    |   |     |
| 39 |                                                                    |   |     |
| 40 | Fracture of vertebral column without spinal cord injury (disorder) | 2 | 0.4 |
| 41 |                                                                    |   |     |
| 42 | Hematoma of face (disorder)                                        | 2 | 0.4 |
| 43 |                                                                    |   |     |
| 44 | Laceration of lip (disorder)                                       | 2 | 0.4 |
| 45 |                                                                    |   |     |
| 46 |                                                                    |   |     |
| 47 | Motor vehicle accident passenger (finding)                         | 2 | 0.4 |
| 48 |                                                                    |   |     |
| 49 | Scalp laceration (disorder)                                        | 2 | 0.4 |
| 50 |                                                                    |   |     |
| 51 | Superficial laceration of face (disorder)                          | 2 | 0.4 |
| 52 |                                                                    |   |     |
| 53 |                                                                    |   |     |
| 54 | Blunt injury (disorder)                                            | 1 | 0.2 |
| 55 |                                                                    |   |     |
| 56 | Cerebral hemorrhage (disorder)                                     | 1 | 0.2 |
| 57 |                                                                    |   |     |
| 58 | Closed fracture carpal bone (disorder)                             | 1 | 0.2 |
| 59 |                                                                    |   |     |
| 60 |                                                                    |   |     |



|    |                                                               |   |     |
|----|---------------------------------------------------------------|---|-----|
| 1  |                                                               |   |     |
| 2  |                                                               |   |     |
| 3  | Closed fracture of base of skull (disorder)                   | 1 | 0.2 |
| 4  |                                                               |   |     |
| 5  | Closed fracture of multiple ribs (disorder)                   | 1 | 0.2 |
| 6  |                                                               |   |     |
| 7  | Closed fracture of of navicular bone of wrist (disorder)      | 1 | 0.2 |
| 8  |                                                               |   |     |
| 9  |                                                               |   |     |
| 10 | Closed fracture of one or more phalanges of hand (disorder)   | 1 | 0.2 |
| 11 |                                                               |   |     |
| 12 | Closed fracture of orbital floor (blow-out) (disorder)        | 1 | 0.2 |
| 13 |                                                               |   |     |
| 14 | Closed fracture of rib (disorder)                             | 1 | 0.2 |
| 15 |                                                               |   |     |
| 16 | Closed fracture of shaft of fibula (disorder)                 | 1 | 0.2 |
| 17 |                                                               |   |     |
| 18 | Closed fracture of upper end of tibia (disorder)              | 1 | 0.2 |
| 19 |                                                               |   |     |
| 20 | Closed fracture of upper end of tibia (disorder)              | 1 | 0.2 |
| 21 |                                                               |   |     |
| 22 | Compression fracture of vertebral column (disorder)           | 1 | 0.2 |
| 23 |                                                               |   |     |
| 24 | Contusion (disorder)                                          | 1 | 0.2 |
| 25 |                                                               |   |     |
| 26 | Contusion of cerebrum (disorder)                              | 1 | 0.2 |
| 27 |                                                               |   |     |
| 28 | Contusion of shoulder region (disorder)                       | 1 | 0.2 |
| 29 |                                                               |   |     |
| 30 | Crushing injury of skull and intracranial contents (disorder) | 1 | 0.2 |
| 31 |                                                               |   |     |
| 32 | Did not wait for treatment (finding)                          | 1 | 0.2 |
| 33 |                                                               |   |     |
| 34 | Elbow fracture (disorder)                                     | 1 | 0.2 |
| 35 |                                                               |   |     |
| 36 | Elbow fracture (disorder)                                     | 1 | 0.2 |
| 37 |                                                               |   |     |
| 38 | Epidural hemorrhage (disorder)                                | 1 | 0.2 |
| 39 |                                                               |   |     |
| 40 | Finding related to falls (finding)                            | 1 | 0.2 |
| 41 |                                                               |   |     |
| 42 | Floaters in visual field (finding)                            | 1 | 0.2 |
| 43 |                                                               |   |     |
| 44 | Foot swelling (finding)                                       | 1 | 0.2 |
| 45 |                                                               |   |     |
| 46 | Fracture of distal end of radius (disorder)                   | 1 | 0.2 |
| 47 |                                                               |   |     |
| 48 | Fracture of lumbar spine (disorder)                           | 1 | 0.2 |
| 49 |                                                               |   |     |
| 50 | Fracture of mandible closed (disorder)                        | 1 | 0.2 |
| 51 |                                                               |   |     |
| 52 | Fracture of mandible closed (disorder)                        | 1 | 0.2 |
| 53 |                                                               |   |     |
| 54 | Fracture of multiple ribs (disorder)                          | 1 | 0.2 |
| 55 |                                                               |   |     |
| 56 | Fracture of orbit (disorder)                                  | 1 | 0.2 |
| 57 |                                                               |   |     |
| 58 | Fracture of orbital roof (disorder)                           | 1 | 0.2 |
| 59 |                                                               |   |     |
| 60 |                                                               |   |     |

|    |                                              |   |     |
|----|----------------------------------------------|---|-----|
| 1  |                                              |   |     |
| 2  |                                              |   |     |
| 3  | Fracture of pelvis (disorder)                | 1 | 0.2 |
| 4  |                                              |   |     |
| 5  | Fracture of pubis (disorder)                 | 1 | 0.2 |
| 6  |                                              |   |     |
| 7  | Fracture of skull (disorder)                 | 1 | 0.2 |
| 8  |                                              |   |     |
| 9  |                                              |   |     |
| 10 | Fracture of sternum (disorder)               | 1 | 0.2 |
| 11 |                                              |   |     |
| 12 | Fracture of thoracic spine (disorder)        | 1 | 0.2 |
| 13 |                                              |   |     |
| 14 | Fracture of upper jaw closed (disorder)      | 1 | 0.2 |
| 15 |                                              |   |     |
| 16 | Fracture of vertebral column (disorder)      | 1 | 0.2 |
| 17 |                                              |   |     |
| 18 | Hematoma (disorder)                          | 1 | 0.2 |
| 19 |                                              |   |     |
| 20 | Injury of facial nerve (disorder)            | 1 | 0.2 |
| 21 |                                              |   |     |
| 22 | Injury of kidney (disorder)                  | 1 | 0.2 |
| 23 |                                              |   |     |
| 24 | Injury of pancreas (disorder)                | 1 | 0.2 |
| 25 |                                              |   |     |
| 26 | Injury of shoulder region (disorder)         | 1 | 0.2 |
| 27 |                                              |   |     |
| 28 | Intervertebral disc prolapse (disorder)      | 1 | 0.2 |
| 29 |                                              |   |     |
| 30 | Intracranial hemorrhage (disorder)           | 1 | 0.2 |
| 31 |                                              |   |     |
| 32 | Laceration of eye region (disorder)          | 1 | 0.2 |
| 33 |                                              |   |     |
| 34 | Loss of consciousness (finding)              | 1 | 0.2 |
| 35 |                                              |   |     |
| 36 | Migraine (disorder)                          | 1 | 0.2 |
| 37 |                                              |   |     |
| 38 | Motor vehicle accident driver (finding)      | 1 | 0.2 |
| 39 |                                              |   |     |
| 40 | Multiple fractures (disorder)                | 1 | 0.2 |
| 41 |                                              |   |     |
| 42 | Muscle strain (disorder)                     | 1 | 0.2 |
| 43 |                                              |   |     |
| 44 | Neck sprain (disorder)                       | 1 | 0.2 |
| 45 |                                              |   |     |
| 46 | Open fracture of nasal bones (disorder)      | 1 | 0.2 |
| 47 |                                              |   |     |
| 48 | Open fracture of patella (disorder)          | 1 | 0.2 |
| 49 |                                              |   |     |
| 50 | Open fracture of tibia AND fibula (disorder) | 1 | 0.2 |
| 51 |                                              |   |     |
| 52 | Open wound of lower leg (disorder)           | 1 | 0.2 |
| 53 |                                              |   |     |
| 54 |                                              |   |     |
| 55 |                                              |   |     |
| 56 |                                              |   |     |
| 57 |                                              |   |     |
| 58 |                                              |   |     |
| 59 |                                              |   |     |
| 60 |                                              |   |     |

|    |                                                   |   |     |
|----|---------------------------------------------------|---|-----|
| 1  |                                                   |   |     |
| 2  |                                                   |   |     |
| 3  | Pins and needles (finding)                        | 1 | 0.2 |
| 4  |                                                   |   |     |
| 5  | Recurrent falls (finding)                         | 1 | 0.2 |
| 6  |                                                   |   |     |
| 7  | Shoulder pain (finding)                           | 1 | 0.2 |
| 8  |                                                   |   |     |
| 9  |                                                   |   |     |
| 10 | Sprain of wrist (disorder)                        | 1 | 0.2 |
| 11 |                                                   |   |     |
| 12 | Strain of neck muscle (disorder)                  | 1 | 0.2 |
| 13 |                                                   |   |     |
| 14 | Superficial injury of face (disorder)             | 1 | 0.2 |
| 15 |                                                   |   |     |
| 16 |                                                   |   |     |
| 17 | Superficial injury of head (disorder)             | 1 | 0.2 |
| 18 |                                                   |   |     |
| 19 | Syncope (disorder)                                | 1 | 0.2 |
| 20 |                                                   |   |     |
| 21 | Transient global amnesia (finding)                | 1 | 0.2 |
| 22 |                                                   |   |     |
| 23 |                                                   |   |     |
| 24 | Traumatic dislocation of clavicle (disorder)      | 1 | 0.2 |
| 25 |                                                   |   |     |
| 26 | Traumatic subdural hemorrhage (disorder)          | 1 | 0.2 |
| 27 |                                                   |   |     |
| 28 | Unexplained falls (finding)                       | 1 | 0.2 |
| 29 |                                                   |   |     |
| 30 | Victim of trauma with multiple injuries (finding) | 1 | 0.2 |
| 31 |                                                   |   |     |
| 32 |                                                   |   |     |
| 33 | Vomiting (disorder)                               | 1 | 0.2 |
| 34 |                                                   |   |     |
| 35 | Wound discharge (finding)                         | 1 | 0.2 |
| 36 |                                                   |   |     |
| 37 | <hr/>                                             |   |     |
| 38 |                                                   |   |     |
| 39 |                                                   |   |     |
| 40 |                                                   |   |     |
| 41 |                                                   |   |     |
| 42 |                                                   |   |     |
| 43 |                                                   |   |     |
| 44 |                                                   |   |     |
| 45 |                                                   |   |     |
| 46 |                                                   |   |     |
| 47 |                                                   |   |     |
| 48 |                                                   |   |     |
| 49 |                                                   |   |     |
| 50 |                                                   |   |     |
| 51 |                                                   |   |     |
| 52 |                                                   |   |     |
| 53 |                                                   |   |     |
| 54 |                                                   |   |     |
| 55 |                                                   |   |     |
| 56 |                                                   |   |     |
| 57 |                                                   |   |     |
| 58 |                                                   |   |     |
| 59 |                                                   |   |     |
| 60 |                                                   |   |     |

**Table S4.** Significant differences ( $p < .05$ ) between people with and without recorded mTBI diagnosis in Emergency Department (ED) records and/or ED discharge codes indicative of mild traumatic brain injury (mTBI), among confirmed mTBI cases ( $N=351$ ).

| <b>Confirmed mTBI cases (N=351)</b> |                                                                      |                                                                  |                                   |                                                                                    |                                                                                    |                                   |
|-------------------------------------|----------------------------------------------------------------------|------------------------------------------------------------------|-----------------------------------|------------------------------------------------------------------------------------|------------------------------------------------------------------------------------|-----------------------------------|
|                                     | <b>Cases<br/>with no<br/>recorded mTBI<br/>diagnosis<br/>(N=269)</b> | <b>Cases<br/>with recorded<br/>mTBI<br/>diagnosis<br/>(N=81)</b> | <b>Statistical<br/>comparison</b> | <b>Cases<br/>with no ED<br/>discharge codes<br/>indicative of mTBI<br/>(N=314)</b> | <b>Cases<br/>with ED<br/>discharge codes<br/>indicative of<br/>mTBI<br/>(N=37)</b> | <b>Statistical<br/>comparison</b> |
|                                     | <b>N (%)</b>                                                         | <b>N (%)</b>                                                     | <b>p values§</b>                  | <b>N (%)</b>                                                                       | <b>N (%)</b>                                                                       | <b>p values§</b>                  |
| Non-traffic-related injury          | 186 (69.1)                                                           | 66 (81.5)                                                        | 0.03                              | 93 (30.6)                                                                          | 3 (8.1)                                                                            | 0.004                             |
| Discharge destination               |                                                                      |                                                                  | 0.0005                            |                                                                                    |                                                                                    | 0.01                              |
| Discharged home                     | 104 (38.7)                                                           | 29 (35.8)                                                        |                                   | 119 (37.9)                                                                         | 14 (37.8)                                                                          |                                   |

|                                              |            |           |         |            |           |         |
|----------------------------------------------|------------|-----------|---------|------------|-----------|---------|
| Admitted to ED                               | 104 (38.7) | 17 (21)   |         | 115 (36.6) | 6 (16.2)  |         |
| Admitted to ward                             | 61 (22.7)  | 35 (43.2) |         | 80 (25.5)  | 17 (46)   |         |
| Intracranial injuries on head CT             | 4 (2)      | 26 (42.6) | <0.0001 | 16 (6.7)   | 14 (50)   | <0.0001 |
| Headache                                     | 103 (38.3) | 46 (56.8) | 0.009   | 127 (40.5) | 22 (59.5) | 0.03    |
| Concentration problems                       | 0 (0)      | 4 (4.9)   | 0.001   | 2 (0.6)    | 2 (5.4)   | 0.01    |
| Follow-up recommendations                    | 83 (30.9)  | 44 (54.3) | 0.0003  | 106 (33.8) | 22 (59.5) | 0.002   |
| PTA measured                                 | 125 (46.5) | 56 (69.1) | 0.0003  | -          | -         | -       |
| Recorded mTBI diagnosis in the<br>ED records | -          | -         | -       | 85 (27.1)  | 16 (43.2) | 0.04    |

§  $\chi^2$ , z-test, t-test.

**Table S5.** Significant differences ( $p < .05$ ) between people tested for Post-traumatic Amnesia (PTA) versus those not tested, among confirmed mild traumatic brain injury (mTBI) (N=351) and indeterminate cases (N=180).

|                                | Confirmed mTBI cases (N=351)              |                                       |                        | Indeterminate mTBI cases (N=180)              |                                          |                        |
|--------------------------------|-------------------------------------------|---------------------------------------|------------------------|-----------------------------------------------|------------------------------------------|------------------------|
|                                | Confirmed mTBI not tested for PTA (N=169) | Confirmed mTBI tested for PTA (N=182) | Statistical comparison | Indeterminate mTBI not tested for PTA (N=134) | Indeterminate mTBI tested for PTA (N=46) | Statistical comparison |
|                                | N (%)                                     | N (%)                                 | p value§               | N (%)                                         | N (%)                                    | p value§               |
| Transported to ED by ambulance | 108 (63.9)                                | 142 (78)                              | 0.004                  | 30 (22.4)                                     | 26 (56.5)                                | <0.0001                |
| Traffic-related injury         | 32 (18.9)                                 | 67 (36.8)                             | 0.0002                 | 23 (17.2)                                     | 21 (45.7)                                | 0.0001                 |
| Discharge destination          |                                           |                                       | <0.0001                |                                               |                                          | <0.0001                |
| Discharged home                | 98 (58)                                   | 35 (19.2)                             |                        | 106 (79.1)                                    | 21 (45.7)                                |                        |
| Admitted to ED                 | 43 (25.4)                                 | 78 (42.9)                             |                        | 21 (15.7)                                     | 15 (32.6)                                |                        |
| Admitted to ward               | 28 (16.6)                                 | 69 (37.9)                             |                        | 7 (5.2)                                       | 10 (21.7)                                |                        |

|    |                                  |            |            |         |   |   |   |
|----|----------------------------------|------------|------------|---------|---|---|---|
| 1  |                                  |            |            |         |   |   |   |
| 2  |                                  |            |            |         |   |   |   |
| 3  | LOC reported                     | 49 (34.8)  | 85 (53.1)  | 0.005   | - | - | - |
| 4  |                                  |            |            |         |   |   |   |
| 5  | Amnesia reported                 | 85 (71.4)  | 140 (91.5) | <0.0001 | - | - | - |
| 6  |                                  |            |            |         |   |   |   |
| 7  | Brain CT performed               | 116 (68.6) | 150 (82.4) | 0.003   | - | - | - |
| 8  |                                  |            |            |         |   |   |   |
| 9  | Intracranial injuries on head CT | 2 (1.7)    | 28 (18.6)  | <0.0001 | - | - | - |
| 10 |                                  |            |            |         |   |   |   |

11  
12 §  $\chi^2$ , z-test, t-test

13  
14  
15  
16  
17  
18  
19  
20  
21  
22  
23  
24  
25  
26  
27  
28  
29  
30  
31  
32  
33  
34  
35  
36  
37  
38  
39  
40  
41  
42  
43  
44  
45  
46

For peer review only

**Figure S1.** Percent of screened ED presentations aged 18-65 years with confirmed or indeterminate mTBI (total 30 479 screened, 351 confirmed mTBI (1.15%), 180 indeterminate mTBI (0.6%)).

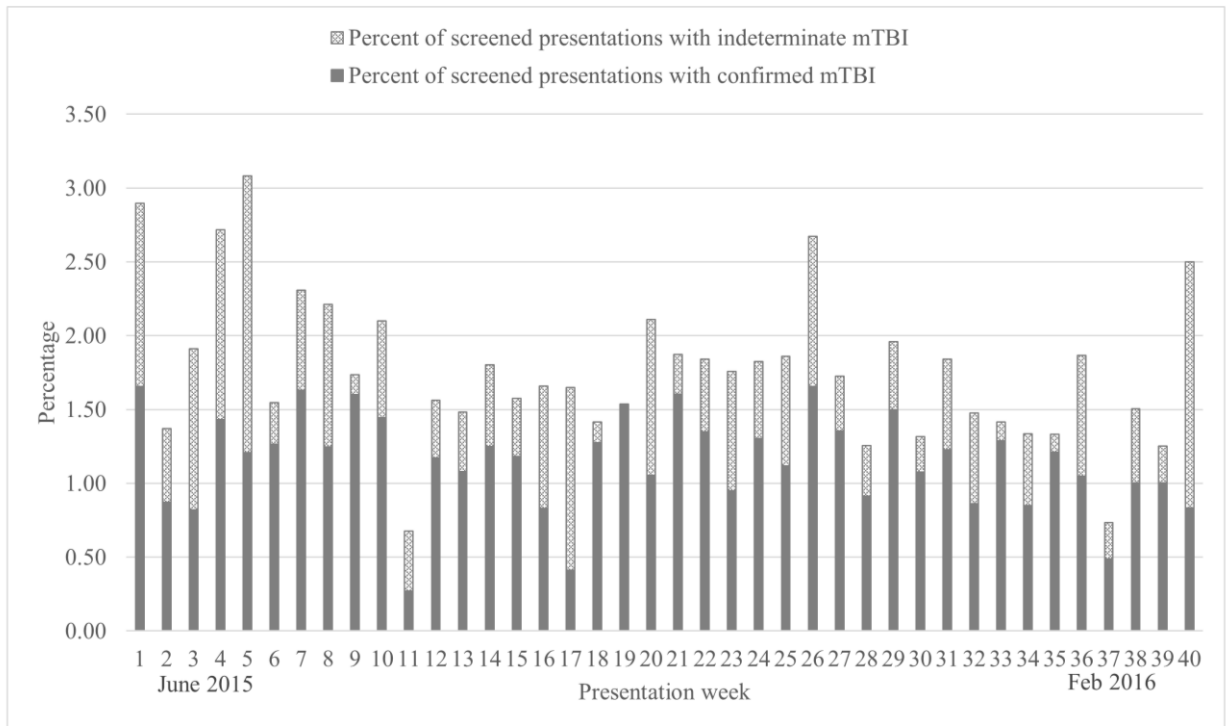

iew only



STROBE Statement—checklist of items that should be included in reports of observational studies  
**YOU MUST NOTE THE PAGE NUMBER WHERE EACH ITEM IS REPORTED INSIDE THE BRACKETS [ ]. IF NOT APPLICABLE WRITE N/A**

|                           | Item No | Recommendation                                                                                                                                                                                                                                                                                                                                                                                                                                                                                                                                                                                                                                                                                                             |
|---------------------------|---------|----------------------------------------------------------------------------------------------------------------------------------------------------------------------------------------------------------------------------------------------------------------------------------------------------------------------------------------------------------------------------------------------------------------------------------------------------------------------------------------------------------------------------------------------------------------------------------------------------------------------------------------------------------------------------------------------------------------------------|
| <b>Title and abstract</b> | 1       | (a) Indicate the study's design with a commonly used term in the title or the abstract [ 1, 3 ]<br>(b) Provide in the abstract an informative and balanced summary of what was done and what was found [ 3 ]                                                                                                                                                                                                                                                                                                                                                                                                                                                                                                               |
| <b>Introduction</b>       |         |                                                                                                                                                                                                                                                                                                                                                                                                                                                                                                                                                                                                                                                                                                                            |
| Background/rationale      | 2       | Explain the scientific background and rationale for the investigation being reported [ 5-7 ]                                                                                                                                                                                                                                                                                                                                                                                                                                                                                                                                                                                                                               |
| Objectives                | 3       | State specific objectives, including any prespecified hypotheses [ 7 ]                                                                                                                                                                                                                                                                                                                                                                                                                                                                                                                                                                                                                                                     |
| <b>Methods</b>            |         |                                                                                                                                                                                                                                                                                                                                                                                                                                                                                                                                                                                                                                                                                                                            |
| Study design              | 4       | Present key elements of study design early in the paper [ 7 ]                                                                                                                                                                                                                                                                                                                                                                                                                                                                                                                                                                                                                                                              |
| Setting                   | 5       | Describe the setting, locations, and relevant dates, including periods of recruitment, exposure, follow-up, and data collection [ 7 ]                                                                                                                                                                                                                                                                                                                                                                                                                                                                                                                                                                                      |
| Participants              | 6       | (a) <i>Cohort study</i> —Give the eligibility criteria, and the sources and methods of selection of participants. Describe methods of follow-up [ 7 ]<br><i>Case-control study</i> —Give the eligibility criteria, and the sources and methods of case ascertainment and control selection. Give the rationale for the choice of cases and controls [ ]<br><i>Cross-sectional study</i> —Give the eligibility criteria, and the sources and methods of selection of participants [ ]<br>(b) <i>Cohort study</i> —For matched studies, give matching criteria and number of exposed and unexposed [ N/A ]<br><i>Case-control study</i> —For matched studies, give matching criteria and the number of controls per case [ ] |
| Variables                 | 7       | Clearly define all outcomes, exposures, predictors, potential confounders, and effect modifiers. Give diagnostic criteria, if applicable [ 8-9 ]                                                                                                                                                                                                                                                                                                                                                                                                                                                                                                                                                                           |
| Data sources/ measurement | 8*      | For each variable of interest, give sources of data and details of methods of assessment (measurement). Describe comparability of assessment methods if there is more than one group [ 8-9 ]                                                                                                                                                                                                                                                                                                                                                                                                                                                                                                                               |
| Bias                      | 9       | Describe any efforts to address potential sources of bias [ 16 ]                                                                                                                                                                                                                                                                                                                                                                                                                                                                                                                                                                                                                                                           |
| Study size                | 10      | Explain how the study size was arrived at [N/A ]                                                                                                                                                                                                                                                                                                                                                                                                                                                                                                                                                                                                                                                                           |
| Quantitative variables    | 11      | Explain how quantitative variables were handled in the analyses. If applicable, describe which groupings were chosen and why [ N/A ]                                                                                                                                                                                                                                                                                                                                                                                                                                                                                                                                                                                       |
| Statistical methods       | 12      | (a) Describe all statistical methods, including those used to control for confounding [ N/A ]<br>(b) Describe any methods used to examine subgroups and interactions [N/A ]<br>(c) Explain how missing data were addressed [ N/A ]<br>(d) <i>Cohort study</i> —If applicable, explain how loss to follow-up was addressed [N/A ]<br><i>Case-control study</i> —If applicable, explain how matching of cases and controls was addressed [ ]<br><i>Cross-sectional study</i> —If applicable, describe analytical methods taking account of sampling strategy [ ]<br>(e) Describe any sensitivity analyses [ N/A ]                                                                                                            |

Continued on next page

1  
2  
3  
4  
5  
6  
7  
8  
9  
10  
11  
12  
13  
14  
15  
16  
17  
18  
19  
20  
21  
22  
23  
24  
25  
26  
27  
28  
29  
30  
31  
32  
33  
34  
35  
36  
37  
38  
39  
40  
41  
42  
43  
44  
45  
46  
47  
48  
49  
50  
51  
52  
53  
54  
55  
56  
57  
58  
59  
60

| <b>Results</b>           |     |                                                                                                                                                                                                                                                                                                                                                                                                                                                                                  |
|--------------------------|-----|----------------------------------------------------------------------------------------------------------------------------------------------------------------------------------------------------------------------------------------------------------------------------------------------------------------------------------------------------------------------------------------------------------------------------------------------------------------------------------|
| Participants             | 13* | (a) Report numbers of individuals at each stage of study—eg numbers potentially eligible, examined for eligibility, confirmed eligible, included in the study, completing follow-up, and analysed [ 9 ]<br>(b) Give reasons for non-participation at each stage [ 9 ]<br>(c) Consider use of a flow diagram [ 9; Figure 1 ]                                                                                                                                                      |
| Descriptive data         | 14* | (a) Give characteristics of study participants (eg demographic, clinical, social) and information on exposures and potential confounders [ 9-11 ; Table 1 ]<br>(b) Indicate number of participants with missing data for each variable of interest [ Table 1 ]<br>(c) <i>Cohort study</i> —Summarise follow-up time (eg, average and total amount) [ N/A ]                                                                                                                       |
| Outcome data             | 15* | <i>Cohort study</i> —Report numbers of outcome events or summary measures over time [ 9-11 ]<br><i>Case-control study</i> —Report numbers in each exposure category, or summary measures of exposure [ ]<br><i>Cross-sectional study</i> —Report numbers of outcome events or summary measures [ ]                                                                                                                                                                               |
| Main results             | 16  | (a) Give unadjusted estimates and, if applicable, confounder-adjusted estimates and their precision (eg, 95% confidence interval). Make clear which confounders were adjusted for and why they were included [proportions are presented in pg 7 and in Table 1 ]<br>(b) Report category boundaries when continuous variables were categorized [ N/A ]<br>(c) If relevant, consider translating estimates of relative risk into absolute risk for a meaningful time period [N/A ] |
| Other analyses           | 17  | Report other analyses done—eg analyses of subgroups and interactions, and sensitivity analyses [ 11-12]                                                                                                                                                                                                                                                                                                                                                                          |
| <b>Discussion</b>        |     |                                                                                                                                                                                                                                                                                                                                                                                                                                                                                  |
| Key results              | 18  | Summarise key results with reference to study objectives [ 12 ]                                                                                                                                                                                                                                                                                                                                                                                                                  |
| Limitations              | 19  | Discuss limitations of the study, taking into account sources of potential bias or imprecision. Discuss both direction and magnitude of any potential bias [ 12, 16-17 ]                                                                                                                                                                                                                                                                                                         |
| Interpretation           | 20  | Give a cautious overall interpretation of results considering objectives, limitations, multiplicity of analyses, results from similar studies, and other relevant evidence [ 12-16 ]                                                                                                                                                                                                                                                                                             |
| Generalisability         | 21  | Discuss the generalisability (external validity) of the study results [ 16]                                                                                                                                                                                                                                                                                                                                                                                                      |
| <b>Other information</b> |     |                                                                                                                                                                                                                                                                                                                                                                                                                                                                                  |
| Funding                  | 22  | Give the source of funding and the role of the funders for the present study and, if applicable, for the original study on which the present article is based [ 18 ]                                                                                                                                                                                                                                                                                                             |

\*Give information separately for cases and controls in case-control studies and, if applicable, for exposed and unexposed groups in cohort and cross-sectional studies.

# BMJ Open

## Challenges in the acute identification of mild traumatic brain injuries: results from an emergency department surveillance study

|                                 |                                                                                                                                                                                                                                                                                                                                                                                                                                                                                                                                                                                                                                                                                                                                    |
|---------------------------------|------------------------------------------------------------------------------------------------------------------------------------------------------------------------------------------------------------------------------------------------------------------------------------------------------------------------------------------------------------------------------------------------------------------------------------------------------------------------------------------------------------------------------------------------------------------------------------------------------------------------------------------------------------------------------------------------------------------------------------|
| Journal:                        | <i>BMJ Open</i>                                                                                                                                                                                                                                                                                                                                                                                                                                                                                                                                                                                                                                                                                                                    |
| Manuscript ID                   | bmjopen-2019-034494.R2                                                                                                                                                                                                                                                                                                                                                                                                                                                                                                                                                                                                                                                                                                             |
| Article Type:                   | Original research                                                                                                                                                                                                                                                                                                                                                                                                                                                                                                                                                                                                                                                                                                                  |
| Date Submitted by the Author:   | 20-Dec-2019                                                                                                                                                                                                                                                                                                                                                                                                                                                                                                                                                                                                                                                                                                                        |
| Complete List of Authors:       | Pozzato, Ilaria; University of Sydney, John Walsh Centre for Rehabilitation Research; University of Sydney - John Walsh Centre for Rehabilitation Research<br>Meares, Susanne; Macquarie University<br>Kifley, Annette; University of Sydney, Centre for Vision Research<br>Craig, Ashley; University of Sydney, Northern Clinical School;<br>Gillett, Mark; University of Sydney, Rehabilitation Studies Unit<br>Vu, Kim Van; University of Sydney, John Walsh Centre for Rehabilitation Research, Kolling Institute<br>Liang, Anthony; University of Sydney, Centre for Vision Research<br>Cameron, Ian; University of Sydney, Rehabilitation Studies Unit<br>Gopinath, Bamini; University of Sydney, Centre for Vision Research |
| <b>Primary Subject Heading</b>: | Emergency medicine                                                                                                                                                                                                                                                                                                                                                                                                                                                                                                                                                                                                                                                                                                                 |
| Secondary Subject Heading:      | Epidemiology                                                                                                                                                                                                                                                                                                                                                                                                                                                                                                                                                                                                                                                                                                                       |
| Keywords:                       | ACCIDENT & EMERGENCY MEDICINE, EPIDEMIOLOGY, Neurological injury < NEUROLOGY, PUBLIC HEALTH, TRAUMA MANAGEMENT                                                                                                                                                                                                                                                                                                                                                                                                                                                                                                                                                                                                                     |
|                                 |                                                                                                                                                                                                                                                                                                                                                                                                                                                                                                                                                                                                                                                                                                                                    |

SCHOLARONE™  
Manuscripts



I, the Submitting Author has the right to grant and does grant on behalf of all authors of the Work (as defined in the below author licence), an exclusive licence and/or a non-exclusive licence for contributions from authors who are: i) UK Crown employees; ii) where BMJ has agreed a CC-BY licence shall apply, and/or iii) in accordance with the terms applicable for US Federal Government officers or employees acting as part of their official duties; on a worldwide, perpetual, irrevocable, royalty-free basis to BMJ Publishing Group Ltd ("BMJ") its licensees and where the relevant Journal is co-owned by BMJ to the co-owners of the Journal, to publish the Work in this journal and any other BMJ products and to exploit all rights, as set out in our [licence](#).

The Submitting Author accepts and understands that any supply made under these terms is made by BMJ to the Submitting Author unless you are acting as an employee on behalf of your employer or a postgraduate student of an affiliated institution which is paying any applicable article publishing charge ("APC") for Open Access articles. Where the Submitting Author wishes to make the Work available on an Open Access basis (and intends to pay the relevant APC), the terms of reuse of such Open Access shall be governed by a Creative Commons licence – details of these licences and which [Creative Commons](#) licence will apply to this Work are set out in our licence referred to above.

Other than as permitted in any relevant BMJ Author's Self Archiving Policies, I confirm this Work has not been accepted for publication elsewhere, is not being considered for publication elsewhere and does not duplicate material already published. I confirm all authors consent to publication of this Work and authorise the granting of this licence.

1  
2  
3 **Challenges in the acute identification of mild traumatic brain injuries: results from an**  
4 **emergency department surveillance study**  
5  
6  
7  
8  
9

10 Ilaria Pozzato<sup>1</sup> MD, MMed

11  
12 Susanne Meares<sup>2</sup> PhD

13  
14 Annette Kifley<sup>1</sup> PhD

15  
16 Ashley Craig<sup>1</sup> PhD

17  
18 Mark Gillett<sup>3</sup> MD, MclinEd

19  
20 Kim Van Vu<sup>1</sup> B

21  
22 Anthony Liang<sup>1</sup> B

23  
24 Ian D Cameron<sup>1</sup> PhD

25  
26 Bamini Gopinath<sup>1</sup> PhD  
27  
28  
29  
30  
31  
32

33 <sup>1</sup> John Walsh Centre for Rehabilitation Research, Sydney Medical School, Kolling Institute of  
34 Medical Research, The University of Sydney, Sydney, Australia.  
35

36 <sup>2</sup> Department of Psychology, Macquarie University, Sydney, Australia.  
37

38 <sup>3</sup> Emergency Department, Royal North Shore Hospital, Sydney, Australia.  
39  
40  
41  
42  
43

44 Correspondence to: Bamini Gopinath

45  
46 John Walsh Centre for Rehabilitation Research, The University of Sydney,  
47

48 Kolling Institute of Medical Research  
49

50 Corner Reserve Road & Westbourne Street, Royal North Shore Hospital  
51

52 St Leonards, NSW 2065, Australia  
53

54 Telephone: 61 2 9926 4962 Fax: 61 2 9926 4045  
55

56 Email: [bamini.gopinath@sydney.edu.au](mailto:bamini.gopinath@sydney.edu.au)  
57  
58  
59  
60

1  
2  
3  
4  
5  
6  
7  
8  
9  
10  
11  
12  
13  
14  
15  
16  
17  
18  
19  
20  
21  
22  
23  
24  
25  
26  
27  
28  
29  
30  
31  
32  
33  
34  
35  
36  
37  
38  
39  
40  
41  
42  
43  
44  
45  
46  
47  
48  
49  
50  
51  
52  
53  
54  
55  
56  
57  
58  
59  
60

Abstract: 260/300; Text: 3797/400; Tables: 4; Figures: 1; Supplementary material:6.

For peer review only

## ABSTRACT

**Objectives:** To establish the proportion of mild traumatic brain injury (mTBI) diagnosis among people presenting to an Emergency Department (ED), to determine the accuracy of recorded ED diagnoses. We also aimed to describe challenges in mTBI case identification and its acute hospital management.

**Design and Setting:** A retrospective chart review of all ED attendances to a major trauma hospital, over a 9-month period (June 2015-February 2016).

**Participants:** Adults aged 18-65 years consecutively presenting to an ED.

**Primary Outcome Measures:** Proportion of mTBI diagnosis among ED attendances, (i.e. confirmed mTBI based on the World Health Organization (WHO) criteria or indeterminate mTBI based on secondary criteria), and proportion of accurately recorded mTBI diagnosis by ED clinicians (i.e. 'mTBI, 'concussion').

**Results:** Of 30 479 ED attendances, 351 (1.15%) confirmed mTBI diagnosis and 180 (0.6%) indeterminate diagnosis were identified. Only 81 (23.1%) individuals with a confirmed mTBI had a 'mTBI diagnosis' clearly recorded in the medical notes. Of the allocated discharge diagnosis codes to the two identified cohorts, 89.8% were not indicative of mTBI. Intracranial injuries were found in 31 (8.5%) confirmed cases. Glasgow Coma Scale scores were consistently assessed in the ED but identified only 117 (33.3%) confirmed mTBI cases. Post-traumatic amnesia (PTA) testing was able to confirm acute cognitive impairment, in 113 (62.1%) of those who were tested (182, 51.3%).

**Conclusions:** mTBI is a common, but an under-recognized cause for ED attendance. Despite challenges, the use of an operational definition such as the WHO diagnostic criteria can improve accuracy in mTBI identification. Acute management may be enhanced by rapid assessment of PTA.

## STRENGTHS AND LIMITATIONS OF THIS STUDY

- A systematic chart review of all Emergency Department attendances was employed to capture any possible mild traumatic brain injury (mTBI) case.
- The use of standard diagnostic criteria to establish the occurrence of mTBI diagnosis, ensures accuracy in identification and comparability across existing research.
- This study provides novel data on proportions of rapid post-traumatic amnesia screening in NSW, Australia, where there is written recommendation around PTA screening in all Emergency Departments.
- Collecting data from single hospital site limits generalizability of study findings.
- Given the retrospective design, conclusions on mTBI occurrence and accuracy of designation were limited by the availability of documented clinical information, with mTBI occurrence possibly being underestimated.



## INTRODUCTION

Mild traumatic brain injuries (mTBI) are a serious public health problem that is referred to as a 'silent epidemic'. [1] Though being the least severe of all brain injuries, identification is the most challenging, with mTBI often missed at diagnosis. [2] Major barriers to mTBI identification are the wide variability in criteria used for diagnosis and the lack of sensitive standardized measures for identifying mTBI manifestations, which are commonly subtle and rapidly-resolving. [2, 3] Despite these limitations, the World Health Organization (WHO) best-evidence review estimated that hospital-treated mTBI are in the range of 100-300/100 000 population. [4] Diagnosis and management of mTBI largely occur in an emergency department (ED). [5] Little information exists, however, about the accuracy of mTBI identification in emergency settings. Two studies, conducted in three Canadian EDs [6] and two EDs in the US, [7] found that up to 50% of patients sustaining mTBI received an inaccurate ED diagnosis. Poor identification likely impacts clinical management of these patients. Given trends in increasing ED attendances for head trauma [8, 9] there is a critical need to for research that addresses the challenges in mTBI diagnosis.

Another challenge for ED clinicians is the identification of mTBI cases at major risk of complications versus those who can be safely discharged. [10] Latest research suggests that these so-called minor injuries can have long-term impacts that extend beyond the anticipated 3-month timeframe of cognitive recovery for uncomplicated cases, calling for urgent improvements in the acute management of mTBI. Long-term impacts include higher health care usage [11], psychosocial complications [12, 13] and in vulnerable subgroups chronic cognitive symptomatology [12, 14] and neural cellular alterations [15, 16] not easily detectable by routine radiological examinations that may increase the risk of neurodegeneration. [17] EDs represent a crucial point where accurate identification and early management of these patients may prevent long-term personal and economic impacts.

1  
2  
3 Key steps to aid early and accurate identification and management of mTBI include  
4  
5 enhanced consistency in diagnostic criteria and standardized assessment methods.[3] An  
6  
7 internationally-recognised operational definition was developed by the WHO Task Force,[3, 4]  
8  
9 clearly outlining the four key clinical manifestations for mTBI diagnosis. These are:(i) level of  
10  
11 consciousness, (ii) confusion or disorientation, (iii) post-traumatic amnesia (PTA) and (iv)  
12  
13 transient neurological abnormalities, such as computed tomography (CT)-detected intracranial  
14  
15 injuries, the latter defined as complicated mTBI (about 10% of cases).[18] Recommended  
16  
17 objective measures to assess TBI 'severity' include conventional radiology to exclude  
18  
19 structural lesions and the Glasgow Coma Scale (GCS) to monitor level of consciousness (i.e.  
20  
21 mTBI is defined as GCS scores of 13-15 out of 15 and a loss of consciousness (LOC) of  $\leq 30$   
22  
23 minutes). However, no clear guidance is given by the WHO on the clinical assessment of the  
24  
25 other TBI diagnostic criteria. [4] This particularly applies to PTA, which is recognized as the  
26  
27 best prognostic indicator of mTBI outcomes. [19, 20]  
28  
29  
30  
31  
32

33 PTA is a complex clinical concept reflecting an acute transient cognitive dysfunction [21]  
34  
35 that presents not only as amnesia but more broadly as a period of inability to store new  
36  
37 information, confusion, disorientation or behavioural changes. [3, 21] While standardized  
38  
39 testing exist to assess the resolution of acute cognitive dysfunction (i.e. PTA) these are rarely  
40  
41 used in the acute management of mTBI patients because many protocols are too lengthy to be  
42  
43 administered in ED settings.[21] In NSW, Australia, the Abbreviated Westmead PTA Scale  
44  
45 (A-WPTAS), [21] was specifically designed for ED use and recommended statewide (NSW  
46  
47 Ministry of Health, Initial management of closed head injury in adults, 2011) as a brief  
48  
49 validated measure of PTA to improve identification of traumatic brain injury events among  
50  
51 closed head injury patients with a GCS of 13-15 (NSW Ministry of Health, Initial management  
52  
53 of closed head injury in adults, 2011). This measure includes five GCS orientation items plus a  
54  
55 memory test of recall of three picture cards learnt on the first trial. The test is repeated hourly  
56  
57  
58  
59  
60

1  
2  
3 for up to four hours until optimal scores of 18 out of 18 are obtained (i.e. 15 on the GCS, plus 3  
4 on the memory test), indicating a resolution of PTA, if present. Though the A-WPTAS has  
5  
6 been shown to assist with a safer discharge of people with mTBI, by identifying cases with a  
7  
8 GCS of 15/15 who remain acutely cognitively impaired, [20] and reducing hospitalization and  
9  
10 direct costs [22], its implementation to date appears inconsistent. Unpublished Australian data  
11  
12 showed that rates of PTA screening in ED range from 0 to 31%, [10] while findings from a  
13  
14 recent randomized controlled trial showed lower rates (i.e. below 13%). [23] This highlights  
15  
16 the need for further studies to investigate the extent and possible benefit of A-WPTAS  
17  
18 implementation in emergency settings.  
19  
20  
21  
22

23  
24 Given the current challenges in mTBI diagnosis and limitations of existing  
25  
26 epidemiological research, this study primarily aimed to establish: (i) the occurrence of mTBI  
27  
28 diagnosis among ED attendances (i.e. meeting standard diagnostic criteria), and the proportion  
29  
30 of these that received a clearly recorded mTBI diagnosis (i.e. based on clinical notes and/or  
31  
32 diagnosis codes). A secondary aim was to describe challenges in acute identification and  
33  
34 management of mTBI, such as the implementation of a validated measure for PTA screening in  
35  
36 ED.  
37  
38  
39  
40  
41

## 42 **METHODS**

43  
44 This is a retrospective cohort study, employing chart review and standard WHO  
45  
46 diagnostic criteria to define occurrence of mTBI among adults aged 18-65 years with ED  
47  
48 attendances of a major trauma hospital in Sydney, Australia, over a 9-month period (from June  
49  
50 2015 to February 2016). Ethical approval was obtained from the Northern Sydney Local Health  
51  
52 District Ethics, Sydney, Australia (LNR/16/HAWKE/388; LNRSSA/16/HAWKE/389). Two  
53  
54 independent chart auditors systematically screened all ED attendances within the study period  
55  
56  
57  
58  
59  
60

1  
2  
3 and reviewed all recorded information in ambulance reports, ED and medical notes, to  
4  
5 determine whether mTBI occurred. Details of the study method are available. [24]  
6

7  
8 The main outcomes were: (i) proportions of identified mTBI diagnosis, meeting WHO  
9  
10 diagnostic criteria, among total ED attendances within 24 hours post-injury, meeting study age-  
11  
12 range and timeframe, and (ii) proportions of accurately recorded mTBI diagnoses by ED  
13  
14 clinicians based on positive mTBI-related definition documented in the medical record. A  
15  
16 confirmed mTBI diagnosis was ascertained based on the presence of any of the four mTBI  
17  
18 manifestations (i.e. level of consciousness, confusion/disorientation, post-traumatic amnesia,  
19  
20 transient neurological abnormalities), as expressed by the corresponding WHO criteria (Table 1  
21  
22 and Online Supplementary Table S1): [4, 21] (i) a GCS of 13–15 30 minutes after injury or on  
23  
24 later presentation to healthcare; and/or loss of consciousness of  $\leq 30$  mins; (ii)  
25  
26 confusion/disorientation, (iii) PTA <24-hours, and/or (iv) CT-detected intracranial injuries not  
27  
28 requiring neurosurgery, respectively.  
29  
30  
31  
32

33  
34 Despite the uniqueness of this study in using a validated measure for PTA screening in  
35  
36 ED, initial chart review indicated PTA testing was not consistently administered. Further,  
37  
38 optimal scores obtained during ED stay would still not be able to identify cases whose PTA  
39  
40 resolved early post-injury [2] (i.e. optimal scores meaning that PTA, if present, had resolved).  
41  
42 These cases could, instead, be identified by any evidence of PTA manifestations (i.e. any gap in  
43  
44 memory, period of confusion/disorientation, behavioral changes) documented by ambulance  
45  
46 and emergency staff in their clinical observations. Therefore, to ascertain the presence of PTA  
47  
48 as criterium for mTBI occurrence, a summary PTA-related mTBI designation (Online  
49  
50 Supplementary Table S2) was developed by cross-checking any PTA-related neurological and  
51  
52 behavioural disturbances documented in medical records, from the time of injury to hospital  
53  
54 discharge. A positive PTA designation was defined by any of the following source: acute  
55  
56 cognitive impairment on A-WPTAS testing, observed behavioural change suggestive of PTA  
57  
58  
59  
60

1  
2  
3 (e.g. repetitive questioning, combative behaviour), as well as any observed/self-reported gap in  
4  
5 memory, or confusion/disorientation thereby fulfilling two of the WHO criteria. [3, 21]  
6  
7

8 In the absence of any documented WHO criterion, indeterminate evidence of mTBI [25]  
9  
10 was defined based on the presence of any secondary criteria: [20] (i) optimal scores (i.e. 18/18)  
11  
12 on the second trial of the A-WPTAS indicating that PTA, if present, had resolved, (ii)  
13  
14 symptoms that may correspond to ‘post-concussion symptoms’ but which are not specific to  
15  
16 mTBI,[24] (iii) transient neurological abnormalities (excluding intracranial injuries not  
17  
18 requiring surgery), which are not common findings or clinical features of mTBI [2, 3] and are  
19  
20 not recommended as stand-alone mTBI criteria,[2] or (iii) queried LOC/amnesia.  
21  
22  
23

24 The accuracy of the diagnosis given by ED clinicians to the identified individuals with  
25  
26 mTBI diagnosis was assessed by the presence of any recorded ‘mTBI’, ‘concussion’, ‘post-  
27  
28 concussion symptoms/syndrome’ diagnoses in medical notes.[26] In addition, allocation of  
29  
30 relevant mTBI-related discharge diagnosis codes (SNOWMED codes) was also explored, to  
31  
32 inform how much routinely collected administrative data could be useful for brain injury  
33  
34 diagnostic purpose.  
35  
36  
37  
38  
39

#### 40 **Patient and Public Involvement**

41  
42 Patients or the public were not involved in the design, or conduct, or reporting, or  
43  
44 dissemination of our research.  
45  
46  
47  
48  
49  
50

## 51 **RESULTS**

### 52 **Identified cases with mTBI diagnosis**

53  
54 During the study period, 30 479 adults aged 18-65 years attended the ED and were screened  
55  
56 (Figure 1). Of the 587 mTBI-related ED presentations initially identified, 56 cases were  
57  
58  
59  
60

1  
2  
3 excluded due to: (N=27) self-discharge or unclear evidence of mTBI, (N=8) confounding  
4 factors (e.g. intubation, psychosis, medical comorbidities) or possible moderate TBI (e.g.  
5 LOC/amenia of unclear duration). Also excluded were 21 (3.9%) individuals who represented  
6 for the same mTBI event. Among total ED attendances, 351 (1.15%) confirmed mTBI  
7 diagnoses and an additional 180 (0.6%) cases with insufficient/indeterminate mTBI evidence  
8 were identified (Online Supplementary Figure S1). Of these, two people (0.4%) sustained  
9 multiple mTBI (i.e. repetitive mTBI). Sociodemographic, injury-related and acute management  
10 details are illustrated in Table 1-3.

11  
12 A clearly recorded mTBI diagnosis in ED records [26] was present only in 23.1% (N=81)  
13 of confirmed mTBI and 18.9% (N=34) of indeterminate cases. Similarly, among the 551 ED  
14 diagnosis codes (i.e. SNOWMED codes) (Table 4) allocated to the two identified cohorts, the  
15 most commonly used code descriptor was 'injury of head' (N=145, 26.3%). Only 56 of these  
16 codes (10.2%) were specifically indicative of brain injury occurrence, with 'concussion' being  
17 the most common (N=26, 46.4%). The remaining codes mostly reflected intracranial injury  
18 findings (see also Online Supplementary Table S3, which shows the full list of ED discharge  
19 diagnosis codes).

20  
21 Confirmed mTBI cases that were given a clearly-recorded mTBI diagnosis and/or a  
22 discharge code suggestive of mTBI were more likely to (Online Supplementary Table S4): be a  
23 non-traffic-crash related mTBI ( $p<.05$ ), be admitted to a ward ( $p<.05$ ), have CT-detected  
24 intracranial injuries ( $p<.0001$ ), present with headaches ( $p<.05$ ) and/or concentration problems  
25 ( $p<.05$ ), and be recommended for follow-up care ( $p<.01$ ). Furthermore, those with a clearly-  
26 recorded mTBI diagnosis were more likely to have been tested for PTA ( $p=.0003$ ), while those  
27 with an allocated discharge code suggestive of mTBI were more likely to have a clearly written  
28 mTBI diagnosis in their ED records also ( $p=.04$ ).

### **Injury-related characteristics**

Cases with a confirmed mTBI diagnosis met the following WHO criteria: initial GCS of 13-14 (i.e. at the scene 30 minutes post-injury/at ED admission; N=117; 33.3%), LOC (i.e. witnessed/self-reported; N=185; 52.7%), amnesia (i.e. observed/self-reported; N=229; 65.2%), confusion/disorientation (N=97; 27.6%), and CT-detected intracranial injuries (N=31; 8.8%).

Multiple WHO criteria were present in 186 cases (53%) (Table 1). Cases with an indeterminate mTBI diagnosis met the following secondary criteria in the absence of WHO criteria: optimal scores of 18/18 on the A-WPTAS (N=45; 25%), presence of post-concussion symptoms (133; 73.9%), transient neurological abnormalities (N=22; 12.2%) queried LOC (N=12; 6.7%) and/or queried amnesia (N=3; 1.7%). Multiple secondary criteria were present in 32 cases (17.8%).

Fall was the most common cause of mTBI in both confirmed (39.1%) and indeterminate (31.1%) groups, followed by motor vehicle crash (28.2% - confirmed; 24.4% - indeterminate). Alcohol or drug use in association with the injury was self-reported or clinically observed in 127 (36.2%) confirmed cases compared to only 19 (10.6 %) of indeterminate cases ( $p<.001$ ).

### **Acute hospital management details**

Brain imaging was undertaken in 75.8% of cases with a confirmed mTBI diagnosis and 40.6% of cases with an indeterminate mTBI ( $p<.001$ ; Table 3). Only 182 (51.8%) individuals with a confirmed mTBI were tested for PTA (i.e. A-WPTAS or WPTAS). Of these, the majority (106; 58.4%) had a PTA duration of >1 to 12 hours, 32 (17.8%) obtained optimal scores of 18/18 (i.e. did not fail A-WPTAS testing) and 37 (20.4%) had an unknown designation due to incomplete/missing documentation. Median time to the first PTA testing was 3.7 (2.3-6.1) hours post-injury for confirmed mTBI diagnosis and 2.5 (1.7-4.9) hours for indeterminate mTBI.

1  
2  
3 The summary PTA-related mTBI designation (Online Supplementary Tables S2)  
4 including any documented positive PTA-related findings (i.e. neurological and behavioural  
5 disturbances) in the medical records, identified a total of 260 (74.1%) confirmed mTBI cases  
6 with PTA. The majority (89.8%) were identified based on two WHO criteria of observed/self-  
7 reported amnesia (i.e. any gap in memory) and/or period of confusion/ disorientation, with a  
8 further nine people deemed in PTA only due to failing the A-WPTAS (N=8) or due to reported  
9 behavioral changes in medical records, (N=1) (i.e. repetitive questioning). All these nine cases,  
10 except one, also met at least one of the other mTBI WHO criteria (e.g. LOC, GCS=13-14,  
11 intracranial injuries).

12  
13  
14 In both groups, people tested for PTA were more likely to (Online Supplementary Table  
15 S5): be transported to ED by ambulance ( $p<.01$ ); sustain a traffic-related mTBI ( $p<.001$ ); be  
16 admitted to ED/ward ( $p<.0001$ ). Confirmed mTBI cases were more likely tested for PTA in the  
17 presence of other mTBI signs, such as LOC ( $p=.005$ ), amnesia ( $p<.0001$ ) and brain imaging  
18 ( $p=0.003$ ) with positive findings ( $p<.0001$ ).

## 19 20 21 22 23 24 25 26 27 28 29 30 31 32 33 34 35 36 37 38 **DISCUSSION**

39  
40 By using the WHO operational criteria, our study reports an occurrence of confirmed mTBI  
41 diagnosis among ED total attendances of 1.2% (351/30 479). These findings correspond to the  
42 1.1-1.3% proportion observed in a preliminary study, which used the same criteria and methods  
43 for TBI diagnosis [20, 24] therefore confirming the robustness of the proposed WHO  
44 surveillance system for acute mTBI identification. A similar proportion of mTBI cases seeking  
45 emergency care (1.9%; 670/35 096) was also reported in a prospective cohort study conducted  
46 in a large metropolitan ED in New York. [27] This study employed the alike 1993 American  
47 College of Rehabilitation Medicine criteria,[27] as operational definition, suggesting that using  
48  
49  
50  
51  
52  
53  
54  
55  
56  
57  
58  
59  
60



1  
2  
3 standard diagnostic criteria can enhance consistency in mTBI identification and comparability  
4  
5 of study findings.  
6

7  
8 Worryingly, only 23.1% (81/351) of our identified cohort with a confirmed mTBI  
9  
10 diagnosis (i.e. meeting the WHO criteria) had an accurate mTBI diagnosis documented in the  
11  
12 medical records (i.e. written diagnosis of ‘concussion’, ‘mTBI’). The proportion of accurate  
13  
14 diagnoses was much lower than reported in two previous prospective studies conducted in  
15  
16 Canada [6] and the US [7] respectively, being  $\geq 50\%$ . While using a retrospective design could  
17  
18 account for these differences, global challenges certainly exist in the acute identification of  
19  
20 ‘minor’ TBI events. This study contributes by providing unique Australian data and suggests  
21  
22 that adopting standard criteria and the assessment of PTA provide so far the best approach to  
23  
24 improve accuracy of mTBI diagnosis.  
25  
26  
27

28  
29 Poor accuracy in mTBI identification in ED [3, 17] could affect current estimates of 100-  
30  
31 300/100 000 reported in a WHO review,[4] hence, underestimating the ‘true’ incidence of  
32  
33 hospital-treated mTBI. Surveillance systems, such as accurate administrative databases, are  
34  
35 recommended strategies to tackle this problem. However, the use of discharge diagnosis codes,  
36  
37 such as ICD coding, in hospital databases has previously been shown not to be sensitive in  
38  
39 detecting mTBI. [26, 27] Our results confirm this gap. Only 10.7% (59/551) of ED discharge  
40  
41 diagnosis codes (SNOWMED codes) allocated to the identified cohorts with either a confirmed  
42  
43 or indeterminate mTBI diagnosis were indicative of mTBI. Despite limitations in the number of  
44  
45 diagnoses able to be recorded (i.e. maximum two SNOWMED codes), there seems to be a  
46  
47 trend for ED clinicians to better identify the more ‘severe’ injuries, i.e. those showing positive  
48  
49 CT findings, being admitted to a ward and receiving follow-up care recommendations. By  
50  
51 contrast, uncomplicated mTBI appears to be overlooked, by not receiving an accurate  
52  
53 designation in ED records or accurate coding. There was also an interchangeable use of terms  
54  
55 like ‘concussion’, ‘(mild/minor) head injury’ and ‘mTBI’, as also shown in previous studies,  
56  
57  
58  
59  
60

1  
2  
3 [3, 17, 27] that suggest a poor clarity in the distinction between those having a traumatic brain  
4 injury versus simple head injuries, thus reiterating the scarce utility of administrative data in  
5 mTBI identification.  
6  
7  
8  
9

10 While the WHO criteria can be regarded as a reliable system for the identification of  
11 individuals who sustained a mTBI, there were challenges in its application. [2] First, it was  
12 unclear how to interpret LOC or amnesia when it was not witnessed/observed as per WHO  
13 recommendations for mTBI identification. It is likely that injured people report a LOC or  
14 amnesia interchangeably, [2] thus, a self-reported LOC/amnesia at the time of the injury  
15 suggests a confirmed mTBI diagnosis. Conversely, when LOC/amnesia was queried by a  
16 physician this more likely suggests indeterminate evidence of mTBI.  
17  
18  
19  
20  
21  
22  
23  
24  
25

26 PTA is the most important TBI prognostic indicator, yet the most challenging to evaluate  
27 because it encompasses a series of acute cognitive impairment signs and symptoms. This study  
28 is unique in its way of screening for PTA in ED by means of a validated measure. However,  
29 standard PTA testing was only available in about half of confirmed mTBI cases (51.9%),  
30 though this was considerably higher than previously reported PTA screening rates (up to  
31 31%). [10, 23] Also, optimal scores of 18/18 on the A-WTPAS were obtained in 17.8% of those  
32 who were tested. While optimal scores clearly indicate the absence of acute cognitive  
33 dysfunction at the time of assessment (i.e. a person is not in PTA), these cannot exclude that  
34 PTA was present before that time, not being informative for mTBI diagnostic purpose.  
35  
36  
37  
38  
39  
40  
41  
42  
43  
44  
45  
46

47 Therefore, this study used a summary PTA-related mTBI designation, accounting for the  
48 positive presence of any PTA-related neurological and behavioural disturbances recorded in  
49 medical records. [3, 21] Using this indicator, we found 260 of the 351 cases with a confirmed  
50 mTBI diagnosis were deemed to be in PTA. Of these, the majority (89.8%) was based on the  
51 presence of observed/self-reported amnesia (i.e. a gap in memory) or confusion/disorientation  
52 (i.e. meeting two of the four WHO criteria), while 9 (2.6%) cases were further identified based  
53  
54  
55  
56  
57  
58  
59  
60

1  
2  
3 only on evidence of acute cognitive impairment (i.e. failing PTA testing; N=8) or observed  
4 behavioral changes (N=1), the latter being repetitive questioning that is typically an indirect  
5 sign of PTA. These additional cases, except one, all met at least one of the other WHO criteria  
6 (e.g. LOC, GCS=13-14, intracranial injuries) for mTBI diagnosis.  
7  
8  
9  
10  
11

12 Overall, these findings reiterate that the WHO criteria together constitute the most  
13 reliable surveillance system for mTBI identification and provide useful information to  
14 specifically identify cases whose PTA may have resolved by the time of ED admission.  
15 Additionally, the implementation of PTA testing, providing objective estimates of acute  
16 cognitive impairment may assist in monitoring recovery progress towards a safer discharge and  
17 enhance diagnostic accuracy of cases where mTBI indicators are unclear or unavailable. The  
18 administration of brief PTA testing (i.e. the A-WTPAS) as an extension of the GCS, which is  
19 usually assessed at the scene by the ambulance staff, [21] could provide a more accurate  
20 estimate of the presence and duration of PTA, thus of mTBI occurrence.  
21  
22  
23  
24  
25  
26  
27  
28  
29  
30  
31  
32

33 Another challenge was the assessment of transient neurological abnormalities, other than  
34 intracranial injuries. Ruff et al. (2009) suggested these abnormalities in isolation do not  
35 constitute a strong basis for mTBI diagnosis because they are not common or typical features of  
36 mTBI.[2] Thus, these were considered as indeterminate evidence of mTBI. The WHO also  
37 recommends excluding cases whose TBI manifestations can be affected or due to other  
38 factors.[28] Unlike other confounders (e.g. intubation, psychiatric disorder), the influence of  
39 alcohol/drug on mTBI manifestations was particularly difficult to assess due to the lack of  
40 objective blood level measurements. Overall, these cases accounted for 36.2% of confirmed  
41 mTBI, that is, in the range of previous findings (30-60%). [29, 30] These findings confirm  
42 intoxication is a major confounding affecting accurate identification of mTBI in busy ED  
43 settings, with day of injury blood alcohol level being associated with: failure on PTA  
44 assessment, [20] a longer duration of LOC, and decreased GCS scores. [31] Differentiation of  
45  
46  
47  
48  
49  
50  
51  
52  
53  
54  
55  
56  
57  
58  
59  
60

1  
2  
3 mTBI in these individuals in the ED setting is likely to be facilitated by the potential  
4  
5 implementation of blood based biomarkers.[32]  
6

7  
8 This study confirms that issues exist in identifying the mildest TBIs,[2] whose clinical  
9  
10 manifestations may resolve within <15 minutes post-injury according to the American  
11  
12 Academy of Neurology classification.[2] Considering the amount of missing or non-  
13  
14 informative/optimal indicators among cases with a confirmed mTBI in this study, as also  
15  
16 reported by previous research,[33] along with PTA measured 2-3 hours post-injury,[21] it is  
17  
18 likely that rapid-resolving LOC/amnesia were missed with a bias towards more severe mTBI.  
19  
20 Secondary criteria were established to identify cases with indeterminate evidence of TBI. These  
21  
22 cases constituted 0.6% of ED total attendances and, interestingly, 18.9% of these received a  
23  
24 positive mTBI diagnosis by ED clinicians. Another study using a similar (probabilistic)  
25  
26 approach found delayed functional recovery in the group with debatable mTBI compared to  
27  
28 healthy and trauma controls, [25] raising concerns around the need for identifying and treating  
29  
30 less-severe mTBI that may appear to not meet diagnostic criteria.  
31  
32  
33

34  
35 Intracranial injuries were found in 31 (8.8%) cases with a confirmed mTBI diagnosis.  
36  
37 [18] Brain CT was performed in 75.8%, plus in 40% of cases with an indeterminate mTBI [18]  
38  
39 Clinical assessment remains the gold-standard for mTBI identification, with PTA testing being  
40  
41 the most promising measure. Among those who were tested, the A-WPTAS was able to detect  
42  
43 acute cognitive impairment in 62.1% of cases (113/182), while the GCS was able to detect only  
44  
45 33.5% of cases (117/349).[20] This study further suggests that when PTA is measured it  
46  
47 increases the likelihood of an accurate mTBI designation provided by ED clinicians.  
48  
49 Implementation of PTA testing in ED settings should be, thus, extended to all individuals with  
50  
51 a possible mTBI [21] to reduce the risk of missed opportunity for mTBI identification and to  
52  
53 contribute to more accurate clinical decision making and safer discharge of patients.  
54  
55  
56  
57  
58  
59  
60

## Study Limitations

Major strengths of this study were the use of standard diagnostic criteria for the identification of mTBI and the systematic screening of any cases with a possible mTBI diagnosis among ED attendances. However, the retrospective design is limiting as we might not have captured important information on confounding factors or mTBI indicators. Similarly, the absence of documented information in medical records does not necessarily imply that standard diagnostic criteria or assessment protocols were not applied by ED clinicians. Generalizability of findings is limited by the following selection bias:[30] a working-age population, 9-month audit-period, and using only a single hospital site. Some of these issues will be addressed by conducting a multi-site study in the future.

## CONCLUSIONS

The findings from this study indicate that mTBI is likely to be under-diagnosed in an emergency care setting. This study confirms the use of an operational definition, such as the WHO operational criteria as a reliable surveillance system for acute identification of mTBI, although challenges still exist in its meticulous application. Identification, prognosis and acute management of individuals with mTBI would be greatly enhanced by the implementation of standardised PTA screening (e.g. A-WPTAS) early after injury. Improvements in clinical and administrative designation of these injuries requires the use of these data to monitor and address long-term health and economic impacts of mTBI.

1  
2  
3  
4  
5  
6  
7  
8  
9  
10  
11  
12  
13  
14  
15  
16  
17  
18  
19  
20  
21  
22  
23  
24  
25  
26  
27  
28  
29  
30  
31  
32  
33  
34  
35  
36  
37  
38  
39  
40  
41  
42  
43  
44  
45  
46  
47  
48  
49  
50  
51  
52  
53  
54  
55  
56  
57  
58  
59  
60

**Funding Support:** This study has received research grant support by the Ramsay Research and Teaching Fund – Northern Sydney Local Health District, Sydney, Australia. The funding source had no role in study design, data collection and analysis, decision to publish and in the writing of this manuscript.

**Competing interests:** None.

**Contributors:** All authors - IP, SM, AK, AC, MG, KVV, AL, IDC, BG - provided inputs in study design. IP, KVV, AL, AK, SM and BG were involved in data collection and data analysis. IP and BG are responsible for publication writing. All authors reviewed and approved the final version of this manuscript.

**Data availability statement:** All data relevant to the study are included in the article or uploaded as supplementary information.

## REFERENCES

1. Goldstein M. Traumatic brain injury: a silent epidemic. *Ann Neurol* 1990;27:327.
2. Ruff RM, Iverson GL, Barth JT, et al. Recommendations for diagnosing a mild traumatic brain injury: a National Academy of Neuropsychology education paper. *Arch Clin Neuropsychol* 2009;24:3-10.
3. Kristman VL, Borg J, Godbolt AK, et al. Methodological issues and research recommendations for prognosis after mild traumatic brain injury: results of the International Collaboration on Mild Traumatic Brain Injury Prognosis. *Arch Phys Med Rehabil* 2014;95:S265-S277.
4. Cassidy JD, Carroll L, Peloso P, et al. Incidence, risk factors and prevention of mild traumatic brain injury: results of the WHO Collaborating Centre Task Force on Mild Traumatic Brain Injury. *J Rehabil Med* 2004;36:28-60.
5. Michelson EA, Huff JS, Loparo M, et al. Emergency Department Time Course for Mild Traumatic Brain Injury Workup. *West J Emerg Med* 2018;19:635-640.
6. Rowe BH, Eliyahu L, Lowes J, et al. Concussion diagnoses among adults presenting to three Canadian emergency departments: missed opportunities. *Am J Emerg Med* 2018;36:2144-2151.
7. Powell J, Ferraro J, Dikmen S, et al. Accuracy of mild traumatic brain injury diagnosis. *Arch Phys Med Rehabil* 2008 89:1550-1555.
8. Marin JR, Weaver MD, Yealy DM, et al. Trends in visits for traumatic brain injury to emergency departments in the United States. *JAMA* 2014;311:1917-1919.
9. Gaw CE, Zonfrillo MR. Emergency department visits for head trauma in the United States. *BMC Emerg Med* 2016;16:5.
10. Bosch M, McKenzie JE, Mortimer D, et al. Implementing evidence-based recommended practices for the management of patients with mild traumatic brain injuries in

1  
2  
3 Australian emergency care departments: study protocol for a cluster randomised controlled  
4 trial. *Trials* 2014;15:1-20.

7 11. Kirsch NL, de Leon MB, Maio RF, et al. Characteristics of a mild head injury subgroup  
8 with extreme, persisting distress on the Rivermead Postconcussion Symptoms questionnaire.  
9  
10  
11  
12 *Arch Phys Med Rehabil* 2010;91:35-42.

14 12. Theadom A, Starkey N, Barker-Collo S, et al. Population-based cohort study of the  
15 impacts of mild traumatic brain injury in adults four years post-injury. *PLoS One*  
16  
17  
18  
19  
20 2018;13:e0191655.

21 13. Stein MB, Jain S, Giacino JT, et al. Risk of Posttraumatic Stress Disorder and Major  
22 Depression in Civilian Patients After Mild Traumatic Brain Injury: A TRACK-TBI Study.  
23  
24  
25  
26  
27 *JAMA Psychiatry* 2019;76:249-258.

28 14. Karr JE, Areshenkoff CN, Garcia-Barrera MA. The neuropsychological outcomes of  
29 concussion: A systematic review of meta-analyses on the cognitive sequelae of mild traumatic  
30  
31  
32  
33  
34  
35 brain injury. *Neuropsychology* 2014;28:321-336.

36 15. Arneson D, Zhang G, Ying Z, et al. Single cell molecular alterations reveal target cells  
37 and pathways of concussive brain injury. *Nat Commun* 2018;9:3894.

39 16. Hocke LM, Duszynski CC, Debert CT, et al. Reduced Functional Connectivity in  
40 Adults with Persistent Post-Concussion Symptoms: A Functional Near-Infrared Spectroscopy  
41  
42  
43  
44  
45 Study. *J Neurotrauma* 2018;35:1224-1232.

46 17. Gardner RC, Yaffe K. Epidemiology of mild traumatic brain injury and  
47 neurodegenerative disease. *Mol Cell Neurosci* 2015;66:75-80.

49 18. Stiell IG, Clement CM, Grimshaw JM, et al. A prospective cluster-randomized trial to  
50  
51  
52  
53  
54  
55  
56  
57  
58  
59  
60 implement the Canadian CT Head Rule in emergency departments. *CMAJ* 2010;182:1527-  
1532.



- 1  
2  
3 19. Tellier A, Marshall SC, Wilson KG, et al. The heterogeneity of mild traumatic brain  
4 injury: Where do we stand? *Brain Inj* 2009;23:879-887.  
5  
6
- 7  
8 20. Meares S, Shores EA, Smyth T, et al. Identifying posttraumatic amnesia in individuals  
9 with a Glasgow Coma Scale of 15 after mild traumatic brain injury. *Arch Phys Med Rehabil*  
10 2015;96:956-959.  
11  
12
- 13  
14 21. Meares S, Shores EA, Taylor AJ, et al. Validation of the Abbreviated Westmead Post-  
15 traumatic Amnesia Scale: a brief measure to identify acute cognitive impairment in mild  
16 traumatic brain injury. *Brain Inj* 2011;25:1198-1205.  
17  
18
- 19  
20 22. Watson C, Clous E, Jaeger M, et al. Introduction of the Abbreviated Westmead Post-  
21 Traumatic Amnesia Scale and impact on length of stay. *Scand J Surg* 2017;106:356-360.  
22  
23
- 24  
25 23. Bosch M, McKenzie JE, Ponsford JL, et al. Evaluation of a targeted, theory-informed  
26 implementation intervention designed to increase uptake of emergency management  
27 recommendations regarding adult patients with mild traumatic brain injury: results of the NET  
28 cluster randomised trial. *Implement Sci* 2019;14:4.  
29  
30
- 31  
32 24. Pozzato I, Cameron ID, Meares S, et al. A surveillance study to determine the accuracy  
33 of mild traumatic brain injury diagnosis in an emergency department: protocol for a  
34 retrospective cohort study. *BMJ Open* 2017;7:e016222.  
35  
36
- 37  
38 25. Korley FK, Diaz-Arrastia R, Falk HJ, et al. Prevalence of incomplete functional and  
39 symptomatic recovery among patients with head injury but brain injury debatable. *J*  
40 *Neurotrauma* 2017;34:1531-1538.  
41  
42
- 43  
44 26. Voss JD, Connolly J, Schwab KA, et al. Update on the epidemiology of  
45 concussion/mild traumatic brain injury. *Curr Pain Headache Rep* 2015;19:32.  
46  
47
- 48  
49 27. Bazarian JJ, Veazie P, Mookerjee S, et al. Accuracy of mild traumatic brain injury case  
50 ascertainment using ICD-9 codes. *Acad Emerg Med* 2006;13:31-38.  
51  
52  
53  
54  
55  
56  
57  
58  
59  
60

- 1  
2  
3 28. Cassidy JD, Boyle E, Carroll LJ. Population-based, inception cohort study of the  
4 incidence, course, and prognosis of mild traumatic brain injury after motor vehicle collisions.  
5  
6 *Arch Phys Med Rehabil* 2014;95:S278-S285.  
7  
8  
9  
10 29. Brennan JH, Bernard S, Cameron PA, et al. Ethanol and isolated traumatic brain injury.  
11  
12 *J Clin Neurosci* 2015;22:1375-1381.  
13  
14  
15 30. Luoto TM, Tenovuo O, Kataja A, et al. Who gets recruited in mild traumatic brain  
16 injury research? *J Neurotrauma* 2013;30:11-16.  
17  
18  
19 31. Yue JK, Ngwenya LB, Upadhyayula PS, et al. Emergency department blood alcohol  
20 level associates with injury factors and six-month outcome after uncomplicated mild traumatic  
21 brain injury. *J Clin Neurosci* 2017;45:293-298.  
22  
23  
24  
25  
26 32. Yue JK, Yuh EL, Korley FK, et al. Association between plasma GFAP concentrations  
27 and MRI abnormalities in patients with CT-negative traumatic brain injury in the TRACK-TBI  
28 cohort: a prospective multicentre study. *Lancet Neurol* 2019;18:953-961.  
29  
30  
31  
32  
33 33. Sharpe S, Kool B, Shepherd M, et al. Mild traumatic brain injury: improving quality of  
34 care in the paediatric emergency department setting. *J Paediatr Child Health* 2012;48:170-176.  
35  
36  
37  
38  
39  
40  
41  
42  
43  
44  
45  
46  
47  
48  
49  
50  
51  
52  
53  
54  
55  
56  
57  
58  
59  
60

**Table 1.** Clinical features of mTBI diagnosis (confirmed mTBI, N=351; indeterminate mTBI, N=180) who presented to ED, illustrated by WHO diagnostic criteria and secondary criteria

|                                      | Confirmed<br>mTBI<br>[WHO<br>criteria]<br>(N=351) | Indeterminate<br>mTBI<br>[Secondary<br>criteria]<br>(N=180) | Statistical<br>comparison<br><br>p values§ |
|--------------------------------------|---------------------------------------------------|-------------------------------------------------------------|--------------------------------------------|
| <b>mTBI WHO criteria</b>             |                                                   |                                                             |                                            |
| <b>(i) Level of consciousness</b>    |                                                   |                                                             |                                            |
| Initial GCS at the scene/ED triage   |                                                   |                                                             |                                            |
| 15 points                            | 232 (66.1)                                        | 180 (100)                                                   |                                            |
| 14 points                            | 103 (29.2)                                        | -                                                           |                                            |
| 13 points                            | 14 (4)                                            | -                                                           |                                            |
| Missing                              | 2 (0.57)                                          | -                                                           |                                            |
| LOC ≤ 30 mins                        |                                                   |                                                             |                                            |
| No                                   | 71 (20.2)                                         | -                                                           |                                            |
| Yes (witnessed/self-reported)        | 185 (52.7)                                        | -                                                           |                                            |
| Missing                              | 50 (14.2)                                         | -                                                           |                                            |
| <b>(ii) Confusion/Disorientation</b> |                                                   |                                                             |                                            |
| <b>(iii) Amnesia &lt; 24 hours</b>   |                                                   |                                                             |                                            |
| No                                   | 40 (11.4)                                         | -                                                           |                                            |

|                                        |            |            |        |
|----------------------------------------|------------|------------|--------|
| Yes (observed/self-reported)           | 229 (65.2) | -          |        |
| Missing                                | 78 (22.2)  | -          |        |
| (iv) Intracranial injuries on brain CT | 31 (8.8)   | -          |        |
| Multiple mTBI WHO criteria             | 186 (53)   | -          |        |
| <b>mTBI Secondary criteria</b>         |            |            |        |
| Queried LOC                            | 45 (12.8)  | 12 (6.7)   | <0.05  |
| Queried amnesia                        | 4 (1.1)    | 3 (1.7)    | 0.564  |
| PTA testing w/ optimal scores          | 32 (9.1)   | 45 (25)    | <0.001 |
| Post-concussion symptoms #             | 183 (52.1) | 133 (73.9) | <0.001 |
| <i>Headache</i>                        | 149 (42.4) | 128 (71.1) |        |
| <i>Nausea/ Vomiting</i>                | 103 (29.3) | 79 (43.9)  |        |
| <i>Dizziness</i>                       | 44 (12.5)  | 58 (32.2)  |        |
| <i>Fatigue</i>                         | 2 (0.6)    | 1 (0.6)    |        |
| <i>Memory problems</i>                 | 5 (1.4)    | 1 (0.6)    |        |
| <i>Concentration problems</i>          | 4 (1.1)    | 2 (1.1)    |        |
| <i>Other</i>                           | 81 (23.1)  | 78(43.3)   |        |
| Transient neurological abnormalities#  | 28 (8)     | 22 (12.2)  |        |
| Multiple mTBI secondary criteria       | -          | 32 (17.8)  |        |

TBI: Traumatic brain injury; WHO: World Health Organization; GCS: Glasgow Coma Scale; ED: Emergency department; LOC: Loss of consciousness; CT: Computer Tomography; PTA: Post-traumatic amnesia; A-WPTAS: Abbreviated Westmead Post Traumatic-Amnesia Scale; WPTAS: Westmead Post-Traumatic Amnesia.

† Proportion of valid cases.

§  $\chi^2$ , z-test, t-test.

Note: The data contains occasional missing data values, which are assumed to be random.

For peer review only

**Table 2.** Socio-demographic and injury-related information of identified cases with a confirmed mTBI diagnosis (N=351) and indeterminate mTBI diagnosis (N=180) who presented to ED.

|                               | <b>Confirmed<br/>mTBI<br/>[WHO<br/>criteria]<br/>(N=351)</b> | <b>Indeterminate<br/>mTBI<br/>[Secondary<br/>criteria]<br/>(N=180)</b> | <b>Statistical<br/>comparison<br/><br/>p values§</b> |
|-------------------------------|--------------------------------------------------------------|------------------------------------------------------------------------|------------------------------------------------------|
| <b>Socio-demographics</b>     |                                                              |                                                                        |                                                      |
| <b>Age (years), mean (SD)</b> | 39.9 (14.2)                                                  | 36.1 (13.1)                                                            | <0.01                                                |
| [median, IQR]                 | [40.8, 26.5-<br>52]                                          | [34.7, 24.1-<br>44.5]                                                  |                                                      |
| <b>Age groups (years)</b>     |                                                              |                                                                        |                                                      |
| 18-24                         | 71 (20.2)                                                    | 52 (28.9)                                                              | 0.02                                                 |
| 25-29                         | 38 (10.8)                                                    | 15 (8.3)                                                               | 0.36                                                 |
| 30-34                         | 36 (10.3)                                                    | 26 (14.4)                                                              | 0.16                                                 |
| 35-39                         | 24 (6.8)                                                     | 19 (10.6)                                                              | 0.13                                                 |
| 40-44                         | 44 (12.5)                                                    | 24 (13.3)                                                              | 0.79                                                 |
| 45-49                         | 34 (9.7)                                                     | 12 (6.7)                                                               | 0.24                                                 |
| 50-54                         | 44 (12.5)                                                    | 9 (5)                                                                  | <0.01                                                |
| 55-59                         | 25 (7.1)                                                     | 11 (6.1)                                                               | 0.66                                                 |
| 60-65                         | 35 (10)                                                      | 12 (6.7)                                                               | 0.21                                                 |

|                                            |            |            |  |        |
|--------------------------------------------|------------|------------|--|--------|
| <b>Sex</b>                                 |            |            |  | <0.001 |
| Male                                       | 254 (72.4) | 90 (50)    |  |        |
| Female                                     | 97 (27.6)  | 90 (50)    |  |        |
| <b>Country of birth</b>                    |            |            |  | 0.50   |
| Australia                                  | 230 (65.5) | 113 (62.8) |  |        |
| Other                                      | 118 (33.6) | 66 (36.7)  |  |        |
| <b>Language spoken at home</b>             |            |            |  | 0.11   |
| English                                    | 334 (95.2) | 165 (91.7) |  |        |
| Other                                      | 17 (4.8)   | 15 (8.3)   |  |        |
| <b>Marital status</b>                      |            |            |  | 0.11   |
| Married/Defacto                            | 171 (48.7) | 83 (46.1)  |  |        |
| Other                                      | 180 (51.3) | 97 (53.9)  |  |        |
| <b>Mental health history<sup>†</sup></b>   | 61 (17.4)  | 23 (12.8)  |  | 0.17   |
| <b>Substance abuse history<sup>†</sup></b> | 36 (10.2)  | 1 (0.5)    |  |        |
| <b>Injury-related details</b>              |            |            |  |        |
| <b>Injury Mechanism</b>                    |            |            |  | 0.35   |
| Fall                                       | 137 (39)   | 56 (31.1)  |  |        |
| Assault                                    | 27 (7.7)   | 14 (7.8)   |  |        |
| Work                                       | 9 (2.6)    | 7 (3.9)    |  |        |
| Sport                                      | 52 (14.8)  | 25 (13.9)  |  |        |
| Other                                      | 27 (7.7)   | 34 (18.9)  |  |        |
| <b>Motor vehicle crash</b>                 | 99 (28.2)  | 44 (24.4)  |  | <0.01  |
| <i>Driver</i>                              | 28 (28.3)  | 15 (34.1)  |  |        |
| <i>Passenger</i>                           | 6 (6.1)    | 6 (13.6)   |  |        |

|    |                                                |            |            |        |
|----|------------------------------------------------|------------|------------|--------|
| 1  |                                                |            |            |        |
| 2  |                                                |            |            |        |
| 3  | <i>Motorbike rider</i>                         | 8 (8.1)    | 10 (22.7)  |        |
| 4  |                                                |            |            |        |
| 5  | <i>Bicyclist</i>                               | 44 (44.4)  | 5 (11.4)   |        |
| 6  |                                                |            |            |        |
| 7  | <i>Pedestrian</i>                              | 10 (10.1)  | 5 (11.4)   |        |
| 8  |                                                |            |            |        |
| 9  | <i>Other</i>                                   | 3 (3)      | 3 (6.8)    |        |
| 10 |                                                |            |            |        |
| 11 |                                                |            |            |        |
| 12 | <b>Reported impact to the head</b>             |            |            | <0.001 |
| 13 |                                                |            |            |        |
| 14 | No                                             | 2 (0.6)    | 1 (0.5)    |        |
| 15 |                                                |            |            |        |
| 16 | Yes                                            | 269 (76.6) | 164 (91.1) |        |
| 17 |                                                |            |            |        |
| 18 | Missing                                        | 80 (22.8)  | 15 (8.3)   |        |
| 19 |                                                |            |            |        |
| 20 |                                                |            |            |        |
| 21 | <b>Associated injury types†</b>                |            |            |        |
| 22 |                                                |            |            |        |
| 23 | Soft tissue laceration                         | 165 (47)   | 55 (30.6)  | <0.001 |
| 24 |                                                |            |            |        |
| 25 | Fracture                                       | 87 (24.8)  | 24 (13.3)  | <0.01  |
| 26 |                                                |            |            |        |
| 27 | Ligamentous                                    | 2 (0.6)    | 2 (1.1)    | 0.49   |
| 28 |                                                |            |            |        |
| 29 | Dislocation                                    | 3 (0.8)    | 0          | 0.21   |
| 30 |                                                |            |            |        |
| 31 | Abrasion, superficial wound, contusion         | 158 (45)   | 83 (46.1)  | 0.81   |
| 32 |                                                |            |            |        |
| 33 | <b>Multiple injury types</b>                   | 105 (29.9) | 29 (16.1)  |        |
| 34 |                                                |            |            |        |
| 35 | <b>Alcohol/drug use at the time of injury†</b> | 127 (36.2) | 19 (10.6)  | <0.001 |
| 36 |                                                |            |            |        |
| 37 |                                                |            |            |        |
| 38 |                                                |            |            |        |
| 39 |                                                |            |            |        |

TBI: Traumatic brain injury; ED: Emergency department.

† Proportion of valid cases.

§  $\chi^2$ , z-test, t-test.

Note: The data contains occasional missing data values, which are assumed to be random.



**Table 3.** Acute hospital management details of identified cases with a confirmed mTBI diagnosis (N=351) and indeterminate mTBI diagnosis (N=180) who presented to ED.

|                                              | <b>Confirmed<br/>mTBI<br/>[WHO<br/>criteria]<br/>(N=351)N (%)</b> | <b>Indeterminate<br/>mTBI<br/>[Secondary<br/>criteria]<br/>(N=180)<br/>N (%)</b> | <b>Statistical<br/>comparison<br/>p values§</b> |
|----------------------------------------------|-------------------------------------------------------------------|----------------------------------------------------------------------------------|-------------------------------------------------|
| <b>ED management details</b>                 |                                                                   |                                                                                  |                                                 |
| <b>ED arrival mode</b>                       |                                                                   |                                                                                  | <0.001                                          |
| By ambulance                                 | 250 (71.2)                                                        | 56 (31.1)                                                                        |                                                 |
| Other                                        | 101 (28.8)                                                        | 124 (68.9)                                                                       |                                                 |
| <b>Triage category</b>                       |                                                                   |                                                                                  | <0.001                                          |
| 1. Seen immediately                          | 24 (6.8)                                                          | 4 (2.2)                                                                          |                                                 |
| 2. Within 10 minutes                         | 170 (48.4)                                                        | 42 (23.3)                                                                        |                                                 |
| 3. Within 30 minutes                         | 116 (33.1)                                                        | 64 (35.6)                                                                        |                                                 |
| 4. Within 1 hour                             | 40 (11.4)                                                         | 69 (38.3)                                                                        |                                                 |
| 5. Within 2 hours                            | 1 (0.3)                                                           | 1 (0.6)                                                                          |                                                 |
| <b>Intubation<sup>†</sup></b>                | 1 (0.3)                                                           | 0                                                                                | 0.47                                            |
| <b>ICU admission<sup>†</sup></b>             | 7 (2)                                                             | 1 (0.6)                                                                          | 0.19                                            |
| <b>Length of ED stay (hrs), median (IQR)</b> | 5.8 (4-8.6)                                                       | 3.8 (2.6-5.7)                                                                    | <0.001                                          |

|    |                                                |                  |                 |        |
|----|------------------------------------------------|------------------|-----------------|--------|
| 1  |                                                |                  |                 |        |
| 2  |                                                |                  |                 |        |
| 3  | <b>Length of hospital stay</b> (days), median  | 3.4 (1.9-6.5)    | 2 (0.9-7.9)     |        |
| 4  |                                                |                  |                 |        |
| 5  | (IQR)                                          |                  |                 |        |
| 6  |                                                |                  |                 |        |
| 7  |                                                |                  |                 |        |
| 8  | <b>Discharge destination</b>                   |                  |                 | <0.001 |
| 9  |                                                |                  |                 |        |
| 10 | Discharged home                                | 133 (37.9)       | 127 (70.6)      |        |
| 11 |                                                |                  |                 |        |
| 12 | Admitted to ED                                 | 121 (34.5)       | 36 (20)         |        |
| 13 |                                                |                  |                 |        |
| 14 | Admitted to ward                               | 97 (27.6)        | 17 (9.4)        |        |
| 15 |                                                |                  |                 |        |
| 16 |                                                |                  |                 |        |
| 17 | <b>Location of initial GCS<sup>†</sup></b>     |                  |                 | <0.001 |
| 18 |                                                |                  |                 |        |
| 19 | At the scene 30-min post-injury                | 216 (61.5)       | 52 (28.9)       |        |
| 20 |                                                |                  |                 |        |
| 21 | At ED presentation                             | 130 (37)         | 127 (70.6)      |        |
| 22 |                                                |                  |                 |        |
| 23 |                                                |                  |                 |        |
| 24 | <b>Brain CT performed<sup>†</sup></b>          | 266 (75.8)       | 73 (40.6)       | <0.001 |
| 25 |                                                |                  |                 |        |
| 26 | <b>PTA measured<sup>†</sup></b>                | 182 (51.9)       | 46 (25.6)       | <0.001 |
| 27 |                                                |                  |                 |        |
| 28 | A-WPTAS                                        | 169 (92.8)       | 44 (95.6)       |        |
| 29 |                                                |                  |                 |        |
| 30 | WPTAS                                          | 19 (10.4)        | 2 (4.4)         |        |
| 31 |                                                |                  |                 |        |
| 32 |                                                |                  |                 |        |
| 33 | <b>Location of PTA testing</b>                 | ( <i>N</i> =182) | ( <i>N</i> =46) |        |
| 34 |                                                |                  |                 |        |
| 35 | In ED                                          | 166 (91.2)       | 44 (95.6)       | 0.364  |
| 36 |                                                |                  |                 |        |
| 37 | In ward                                        | 28 (15.4)        | 2 (4.4)         | <0.05  |
| 38 |                                                |                  |                 |        |
| 39 |                                                |                  |                 |        |
| 40 | <b>Time to PTA testing</b> (hrs), median (IQR) | 3.7 (2.3-6.1)    | 2.5 (1.7-4.9)   | <0.05  |
| 41 |                                                |                  |                 |        |
| 42 | <b>PTA classification based on PTA testing</b> | ( <i>N</i> =182) | ( <i>N</i> =46) | <0.001 |
| 43 |                                                |                  |                 |        |
| 44 | Optimal scores/Did not fail                    | 32 (17.8)        | 40 (87)         |        |
| 45 |                                                |                  |                 |        |
| 46 | 6-30 minutes                                   | 2 (1.1)          | -               |        |
| 47 |                                                |                  |                 |        |
| 48 | 31-60 minutes                                  | 1 (0.1)          | -               |        |
| 49 |                                                |                  |                 |        |
| 50 | >1-12 hours                                    | 106 (58.4)       | -               |        |
| 51 |                                                |                  |                 |        |
| 52 | >12-24 hours                                   | 4 (2.2)          | -               |        |
| 53 |                                                |                  |                 |        |
| 54 | Unknown/incomplete/missing                     | 37 (20.4)        | 6 (13)          |        |
| 55 |                                                |                  |                 |        |
| 56 |                                                |                  |                 |        |
| 57 |                                                |                  |                 |        |
| 58 |                                                |                  |                 |        |
| 59 |                                                |                  |                 |        |
| 60 |                                                |                  |                 |        |

|                                                  |            |            |        |
|--------------------------------------------------|------------|------------|--------|
| <b>Head Injury advice given<sup>†</sup></b>      | 166 (47.3) | 120 (66.7) | <0.001 |
| <b>Follow-up recommendations</b>                 | 128 (36.5) | 43 (23.9)  | <0.01  |
| <b>Representations to ED (within 1 mth)</b>      | 13 (3.7)   | 8 (4.4)    |        |
| <b>Recorded mTBI diagnosis in the ED records</b> |            |            | 0.47   |
| No                                               | 269 (76.9) | 146 (81.1) |        |
| Yes                                              | 81 (23.1)  | 34 (18.9)  |        |

TBI: Traumatic brain injury; GCS: Glasgow Coma Scale; ED: Emergency department; ICU: Intensive care unit; LOC: Loss of consciousness; PTA: Post-traumatic amnesia; A-WPTAS: Abbreviated Westmead Post-Traumatic Amnesia Scale; WPTAS: Westmead Post-Traumatic Amnesia.

<sup>†</sup> Proportion of valid cases.

<sup>§</sup>  $\chi^2$ , z-test, t-test.

Note: The data contains occasional missing data values, which are assumed to be random

**Table 4.** Top 25 ED diagnosis codes (SNOWMED codes) and ED diagnosis codes indicative of mTBI, for the overall mTBI cohort (confirmed mTBI cases, N=351; indeterminate mTBI, N=180)

| Top 25 ED Diagnosis Codes Description                 | N   | %    |
|-------------------------------------------------------|-----|------|
| Injury of head (disorder)                             | 145 | 26.3 |
| Motor vehicle accident victim (finding)               | 49  | 8.9  |
| Minor head injury (disorder)                          | 39  | 7.1  |
| Traumatic injury (disorder)                           | 37  | 6.7  |
| Falls (finding)                                       | 35  | 6.4  |
| Concussion (disorder)                                 | 26  | 4.7  |
| Headache (finding)                                    | 11  | 2.0  |
| Facial laceration (disorder)                          | 10  | 1.8  |
| Victim of physical assault (finding)                  | 9   | 1.6  |
| Alcohol intoxication (disorder)                       | 8   | 1.5  |
| Falling injury (finding)                              | 8   | 1.5  |
| Fractured nasal bones (disorder)                      | 8   | 1.5  |
| Laceration of head (disorder)                         | 8   | 1.5  |
| Post-concussion syndrome (disorder)                   | 7   | 1.3  |
| Injury of face (disorder)                             | 6   | 1.1  |
| Subarachnoid haemorrhage (disorder)                   | 6   | 1.1  |
| Neck pain (finding)                                   | 5   | 0.9  |
| Backache                                              | 4   | 0.7  |
| Intracranial injury without skull fracture (disorder) | 4   | 0.7  |

|                                                               |          |          |
|---------------------------------------------------------------|----------|----------|
| Laceration of forehead (disorder)                             | 4        | 0.7      |
| Closed fracture of clavicle (disorder)                        | 3        | 0.5      |
| Dizziness (finding)                                           | 3        | 0.5      |
| Fracture of maxilla (disorder)                                | 3        | 0.5      |
| Fracture of rib (disorder)                                    | 3        | 0.5      |
| Injury of neck (disorder)                                     | 3        | 0.5      |
| <b>ED Diagnosis Codes indicative of mTBI</b>                  | <b>N</b> | <b>%</b> |
| Concussion (disorder)                                         | 26       | 4.7      |
| Post-concussion syndrome (disorder)                           | 7        | 1.3      |
| Subarachnoid haemorrhage (disorder)                           | 6        | 1.1      |
| Intracranial injury without skull fracture (disorder)         | 4        | 0.7      |
| Subdural hematoma (disorder)                                  | 3        | 0.5      |
| Brief loss of consciousness (finding)                         | 2        | 0.4      |
| Cerebral haemorrhage (disorder)                               | 1        | 0.2      |
| Contusion of cerebrum (disorder)                              | 1        | 0.2      |
| Crushing injury of skull and intracranial contents (disorder) | 1        | 0.2      |
| Epidural haemorrhage (disorder)                               | 1        | 0.2      |
| Intracranial haemorrhage (disorder)                           | 1        | 0.2      |
| Loss of consciousness (finding)                               | 1        | 0.2      |
| Transient global amnesia (finding)                            | 1        | 0.2      |
| Traumatic subdural haemorrhage (disorder)                     | 1        | 0.2      |

## FIGURE LEGENDS

**Figure 1.** Study recruitment flowchart.

## LIST OF SUPPLEMENTAL DIGITAL CONTENT

Supplemental Material Content 1, (Table S1). WHO criteria distribution among the identified cohort of confirmed mTBI cases (N=351).

Supplemental Material Content 2, (Table S2). Confirmed mTBI patients (N=351) with documented PTA (N=260) based on the summary PTA-related mTBI designation, accounting for any documented PTA manifestations: observed/self-reported amnesia or confusion/disorientation fulfilling the WHO criteria, behavioural change or acute cognitive impairment on PTA testing.

Supplemental Material Content 3, (Table S3). Full list of ED diagnosis codes (SNOWMED codes) and ED diagnosis codes indicative of mTBI, for the overall mTBI cohort (confirmed mTBI cases, N=351; indeterminate mTBI, N=180).

Supplemental Material Content 4, (Table S4). Significant differences ( $p < .05$ ) between people with and without recorded mTBI diagnosis in Emergency Department (ED) records and/or ED discharge codes indicative of mild traumatic brain injury (mTBI), among confirmed mTBI cases (N=351).

1  
2  
3 Supplemental Material Content 5, (Table S5). Significant differences ( $p < .05$ ) between people  
4 tested for Post-traumatic Amnesia (PTA) versus those not tested, among confirmed mild  
5 traumatic brain injury (mTBI) (N=351) and indeterminate cases (N=180).  
6  
7  
8  
9  
10

11  
12  
13 Supplemental Material Content 6, (Figure S1). Percent of screened ED presentations aged 18-  
14 65 years with confirmed or indeterminate mTBI (total 30 479 screened, 351 confirmed mTBI  
15 (1.15%), 180 indeterminate mTBI (0.6%)).  
16  
17  
18  
19  
20  
21  
22  
23  
24  
25  
26  
27  
28  
29  
30  
31  
32  
33  
34  
35  
36  
37  
38  
39  
40  
41  
42  
43  
44  
45  
46  
47  
48  
49  
50  
51  
52  
53  
54  
55  
56  
57  
58  
59  
60

1  
2  
3  
4  
5  
6  
7  
8  
9  
10  
11  
12  
13  
14  
15  
16  
17  
18  
19  
20  
21  
22  
23  
24  
25  
26  
27  
28  
29  
30  
31  
32  
33  
34  
35  
36  
37  
38  
39  
40  
41  
42  
43  
44  
45  
46  
47  
48  
49  
50  
51  
52  
53  
54  
55  
56  
57  
58  
59  
60



Figure 1. Study recruitment flowchart.

254x190mm (300 x 300 DPI)



**Table S1.** WHO criteria distribution among the identified cohort of confirmed mTBI cases (N=351).

| <b>GCS</b>     | <b>LOC</b>       | <b>Amnesia</b>     | <b>Confusion/<br/>disorientation</b> | <b>Intracranial<br/>injuries</b> | <b>N</b>       | <b>%</b> |
|----------------|------------------|--------------------|--------------------------------------|----------------------------------|----------------|----------|
| <b>=13-14</b>  | <b>≤ 30 mins</b> | <b>&lt; 24 hrs</b> |                                      |                                  |                |          |
| <b>(N=117)</b> | <b>(N=185)</b>   | <b>(N=229)</b>     | <b>(N=97)</b>                        | <b>(N=31)</b>                    | <b>(N=351)</b> |          |
| ✓              | ✓                | ✓                  | ✓                                    | ✓                                | 2              | 0.9      |
| ✓              | ✓                | ✓                  | ✓                                    |                                  | 18             | 5.1      |
| ✓              | ✓                | ✓                  |                                      | ✓                                | 5              | 1.4      |
| ✓              | ✓                | ✓                  |                                      |                                  | 10             | 2.8      |
| ✓              | ✓                |                    | ✓                                    |                                  | 6              | 1.7      |
| ✓              | ✓                |                    |                                      |                                  | 6              | 1.7      |
| ✓              |                  | ✓                  | ✓                                    | ✓                                | 4              | 1.1      |
| ✓              |                  | ✓                  | ✓                                    |                                  | 32             | 9.1      |
| ✓              |                  | ✓                  |                                      | ✓                                | 2              | 0.6      |
| ✓              |                  | ✓                  |                                      |                                  | 17             | 4.8      |
| ✓              |                  |                    | ✓                                    |                                  | 2              | 0.6      |
| ✓              |                  |                    |                                      |                                  | 13             | 3.7      |
|                | ✓                | ✓                  | ✓                                    | ✓                                | 1              | 0.3      |
|                | ✓                | ✓                  | ✓                                    |                                  | 9              | 2.6      |
|                | ✓                | ✓                  |                                      | ✓                                | 1              | 0.3      |
|                | ✓                | ✓                  |                                      |                                  | 51             | 14.4     |
|                | ✓                |                    | ✓                                    | ✓                                | 1              | 0.3      |
|                | ✓                |                    | ✓                                    |                                  | 4              | 1.1      |

|    |   |   |   |   |    |      |
|----|---|---|---|---|----|------|
| 1  |   |   |   |   |    |      |
| 2  |   |   |   |   |    |      |
| 3  | ✓ |   |   | ✓ | 3  | 0.8  |
| 4  |   |   |   |   |    |      |
| 5  | ✓ |   |   |   | 68 | 19.4 |
| 6  |   |   |   |   |    |      |
| 7  |   |   |   |   |    |      |
| 8  |   | ✓ | ✓ | ✓ | 1  | 0.3  |
| 9  |   |   |   |   |    |      |
| 10 |   | ✓ | ✓ |   | 8  | 2.3  |
| 11 |   |   |   |   |    |      |
| 12 |   | ✓ |   | ✓ | 2  | 0.6  |
| 13 |   |   |   |   |    |      |
| 14 |   | ✓ |   |   | 66 | 18.7 |
| 15 |   |   |   |   |    |      |
| 16 |   |   |   |   |    |      |
| 17 |   |   | ✓ |   | 10 | 2.8  |
| 18 |   |   |   |   |    |      |
| 19 |   |   |   | ✓ | 9  | 2.6  |
| 20 |   |   |   |   |    |      |

---

WHO: World Health Organization; TBI: Traumatic brain injury; GCS: Glasgow Coma Scale;

LOC: Loss of consciousness.

**Table S2.** Confirmed mTBI patients (N=351) with documented PTA (N=260) based on the summary PTA-related mTBI designation, accounting for any documented PTA manifestations: observed/self-reported amnesia or confusion/disorientation fulfilling the WHO criteria, behavioural change or acute cognitive impairment on PTA testing.

| Summary                                | Observed/self-reported                  | Observed/self-reported                         | Observed Behavioural changes | PTA testing administered | N       | %    |
|----------------------------------------|-----------------------------------------|------------------------------------------------|------------------------------|--------------------------|---------|------|
| PTA-related mTBI designation n (N=260) | Amnesia < 24 hrs [WHO criteria] (N=229) | Confusion/disorientation [WHO criteria] (N=97) | (N=61)                       | (N=182)                  | (N=351) |      |
| ✓                                      | ✓                                       | ✓                                              | ✓                            | ✓                        | 27      | 7.7  |
| ✓                                      | ✓                                       | ✓                                              | ✓                            | -                        | 6       | 1.7  |
| ✓                                      | ✓                                       | ✓                                              | -                            | ✓                        | 24      | 6.8  |
| ✓                                      | ✓                                       | ✓                                              | -                            | -                        | 18      | 5.1  |
| ✓                                      | ✓                                       | -                                              | ✓                            | ✓                        | 16      | 4.6  |
| ✓                                      | ✓                                       | -                                              | ✓                            | -                        | 6       | 1.7  |
| ✓                                      | ✓                                       | -                                              | -                            | ✓                        | 75      | 21.4 |
| ✓                                      | ✓                                       | -                                              | -                            | -                        | 57      | 16.2 |
| ✓                                      | -                                       | ✓                                              | ✓                            | ✓                        | 4       | 1.1  |
| ✓                                      | -                                       | ✓                                              | -                            | ✓                        | 6       | 1.7  |
| ✓                                      | -                                       | ✓                                              | -                            | -                        | 12      | 3.4  |

|    |   |   |   |   |    |                      |            |
|----|---|---|---|---|----|----------------------|------------|
| 1  |   |   |   |   |    |                      |            |
| 2  |   |   |   |   |    |                      |            |
| 3  | ✓ | - | - | ✓ | ✓  | <b>1</b>             | <b>0.3</b> |
| 4  |   |   |   |   |    |                      |            |
| 5  | ✓ | - | - | ✓ |    | <b>1<sup>^</sup></b> | <b>0.3</b> |
| 6  |   |   |   |   |    |                      |            |
| 7  | ✓ | - | - | - | ✓  | <b>7</b>             | <b>2</b>   |
| 8  |   |   |   |   |    |                      |            |
| 9  |   |   |   |   |    |                      |            |
| 10 | - | - | - | - | ✓§ | 20#                  | 5.8        |
| 11 |   |   |   |   |    |                      |            |
| 12 | - | - | - | - | -  | 71#                  | 20.        |
| 13 |   |   |   |   |    |                      |            |
| 14 |   |   |   |   |    |                      |            |
| 15 |   |   |   |   |    |                      | 2          |
| 16 |   |   |   |   |    |                      |            |

---

TBI: Traumatic brain injury; WHO: World Health Organization; PTA: Post-traumatic amnesia

Note: in **bold** are confirmed mTBI (N=9) based only on reported behavioural changes and/or cognitive impairment at PTA testing (i.e. PTA documented). All, except one (<sup>^</sup>), met other mTBI WHO criteria (i.e. LOC ≤ 30 mins, GCS=13-14, intracranial injuries).

# Confirmed mTBI (N=91) with no documented positive findings for PTA manifestations.

§ Individuals who were tested for PTA and obtained optimal scores (i.e. not in PTA), in the absence of PTA manifestations documented in other sources.

**Table S3.** Full list of ED diagnosis codes (SNOWMED codes) and ED diagnosis codes indicative of mTBI, for the overall mTBI cohort (confirmed mTBI cases, N=351; indeterminate mTBI, N=180).

| SNOWMED Codes | Diagnosis Description                                 | N   | %    |
|---------------|-------------------------------------------------------|-----|------|
|               | Injury of head (disorder)                             | 145 | 26.3 |
|               | Motor vehicle accident victim (finding)               | 49  | 8.9  |
|               | Minor head injury (disorder)                          | 39  | 7.1  |
|               | Traumatic injury (disorder)                           | 37  | 6.7  |
|               | Falls (finding)                                       | 35  | 6.4  |
|               | Concussion (disorder)                                 | 26  | 4.7  |
|               | Headache (finding)                                    | 11  | 2.0  |
|               | Facial laceration (disorder)                          | 10  | 1.8  |
|               | Victim of physical assault (finding)                  | 9   | 1.6  |
|               | Alcohol intoxication (disorder)                       | 8   | 1.5  |
|               | Falling injury (finding)                              | 8   | 1.5  |
|               | Fractured nasal bones (disorder)                      | 8   | 1.5  |
|               | Laceration of head (disorder)                         | 8   | 1.5  |
|               | Postconcussion syndrome (disorder)                    | 7   | 1.3  |
|               | Injury of face (disorder)                             | 6   | 1.1  |
|               | Subarachnoid hemorrhage (disorder)                    | 6   | 1.1  |
|               | Neck pain (finding)                                   | 5   | 0.9  |
|               | Backache                                              | 4   | 0.7  |
|               | Intracranial injury without skull fracture (disorder) | 4   | 0.7  |
|               | Laceration of forehead (disorder)                     | 4   | 0.7  |
|               | Closed fracture of clavicle (disorder)                | 3   | 0.5  |

|    |                                                                    |   |     |
|----|--------------------------------------------------------------------|---|-----|
| 1  |                                                                    |   |     |
| 2  |                                                                    |   |     |
| 3  | Dizziness (finding)                                                | 3 | 0.5 |
| 4  |                                                                    |   |     |
| 5  | Fracture of maxilla (disorder)                                     | 3 | 0.5 |
| 6  |                                                                    |   |     |
| 7  | Fracture of rib (disorder)                                         | 3 | 0.5 |
| 8  |                                                                    |   |     |
| 9  |                                                                    |   |     |
| 10 | Injury of neck (disorder)                                          | 3 | 0.5 |
| 11 |                                                                    |   |     |
| 12 | Laceration - injury (disorder)                                     | 3 | 0.5 |
| 13 |                                                                    |   |     |
| 14 | Soft tissue injury (disorder)                                      | 3 | 0.5 |
| 15 |                                                                    |   |     |
| 16 |                                                                    |   |     |
| 17 | Subdural hematoma (disorder)                                       | 3 | 0.5 |
| 18 |                                                                    |   |     |
| 19 | -                                                                  | 2 | 0.4 |
| 20 |                                                                    |   |     |
| 21 | Abrasion of face (disorder)                                        | 2 | 0.4 |
| 22 |                                                                    |   |     |
| 23 | Abrasion of head (disorder)                                        | 2 | 0.4 |
| 24 |                                                                    |   |     |
| 25 |                                                                    |   |     |
| 26 | Alcohol abuse (disorder)                                           | 2 | 0.4 |
| 27 |                                                                    |   |     |
| 28 | Brief loss of consciousness (finding)                              | 2 | 0.4 |
| 29 |                                                                    |   |     |
| 30 |                                                                    |   |     |
| 31 | Closed fracture of facial bone (disorder)                          | 2 | 0.4 |
| 32 |                                                                    |   |     |
| 33 | Fracture of cervical spine (disorder)                              | 2 | 0.4 |
| 34 |                                                                    |   |     |
| 35 | Fracture of face bones (disorder)                                  | 2 | 0.4 |
| 36 |                                                                    |   |     |
| 37 | Fracture of phalanx of finger (disorder)                           | 2 | 0.4 |
| 38 |                                                                    |   |     |
| 39 |                                                                    |   |     |
| 40 | Fracture of vertebral column without spinal cord injury (disorder) | 2 | 0.4 |
| 41 |                                                                    |   |     |
| 42 | Hematoma of face (disorder)                                        | 2 | 0.4 |
| 43 |                                                                    |   |     |
| 44 | Laceration of lip (disorder)                                       | 2 | 0.4 |
| 45 |                                                                    |   |     |
| 46 |                                                                    |   |     |
| 47 | Motor vehicle accident passenger (finding)                         | 2 | 0.4 |
| 48 |                                                                    |   |     |
| 49 | Scalp laceration (disorder)                                        | 2 | 0.4 |
| 50 |                                                                    |   |     |
| 51 | Superficial laceration of face (disorder)                          | 2 | 0.4 |
| 52 |                                                                    |   |     |
| 53 |                                                                    |   |     |
| 54 | Blunt injury (disorder)                                            | 1 | 0.2 |
| 55 |                                                                    |   |     |
| 56 | Cerebral hemorrhage (disorder)                                     | 1 | 0.2 |
| 57 |                                                                    |   |     |
| 58 | Closed fracture carpal bone (disorder)                             | 1 | 0.2 |
| 59 |                                                                    |   |     |
| 60 |                                                                    |   |     |

|    |                                                               |   |     |
|----|---------------------------------------------------------------|---|-----|
| 1  |                                                               |   |     |
| 2  |                                                               |   |     |
| 3  | Closed fracture of base of skull (disorder)                   | 1 | 0.2 |
| 4  |                                                               |   |     |
| 5  | Closed fracture of multiple ribs (disorder)                   | 1 | 0.2 |
| 6  |                                                               |   |     |
| 7  | Closed fracture of of navicular bone of wrist (disorder)      | 1 | 0.2 |
| 8  |                                                               |   |     |
| 9  |                                                               |   |     |
| 10 | Closed fracture of one or more phalanges of hand (disorder)   | 1 | 0.2 |
| 11 |                                                               |   |     |
| 12 | Closed fracture of orbital floor (blow-out) (disorder)        | 1 | 0.2 |
| 13 |                                                               |   |     |
| 14 | Closed fracture of rib (disorder)                             | 1 | 0.2 |
| 15 |                                                               |   |     |
| 16 | Closed fracture of shaft of fibula (disorder)                 | 1 | 0.2 |
| 17 |                                                               |   |     |
| 18 | Closed fracture of upper end of tibia (disorder)              | 1 | 0.2 |
| 19 |                                                               |   |     |
| 20 | Compression fracture of vertebral column (disorder)           | 1 | 0.2 |
| 21 |                                                               |   |     |
| 22 | Contusion (disorder)                                          | 1 | 0.2 |
| 23 |                                                               |   |     |
| 24 | Contusion of cerebrum (disorder)                              | 1 | 0.2 |
| 25 |                                                               |   |     |
| 26 | Contusion of shoulder region (disorder)                       | 1 | 0.2 |
| 27 |                                                               |   |     |
| 28 | Crushing injury of skull and intracranial contents (disorder) | 1 | 0.2 |
| 29 |                                                               |   |     |
| 30 | Did not wait for treatment (finding)                          | 1 | 0.2 |
| 31 |                                                               |   |     |
| 32 | Elbow fracture (disorder)                                     | 1 | 0.2 |
| 33 |                                                               |   |     |
| 34 | Epidural hemorrhage (disorder)                                | 1 | 0.2 |
| 35 |                                                               |   |     |
| 36 | Finding related to falls (finding)                            | 1 | 0.2 |
| 37 |                                                               |   |     |
| 38 | Floaters in visual field (finding)                            | 1 | 0.2 |
| 39 |                                                               |   |     |
| 40 | Foot swelling (finding)                                       | 1 | 0.2 |
| 41 |                                                               |   |     |
| 42 | Fracture of distal end of radius (disorder)                   | 1 | 0.2 |
| 43 |                                                               |   |     |
| 44 | Fracture of lumbar spine (disorder)                           | 1 | 0.2 |
| 45 |                                                               |   |     |
| 46 | Fracture of mandible closed (disorder)                        | 1 | 0.2 |
| 47 |                                                               |   |     |
| 48 | Fracture of multiple ribs (disorder)                          | 1 | 0.2 |
| 49 |                                                               |   |     |
| 50 | Fracture of orbit (disorder)                                  | 1 | 0.2 |
| 51 |                                                               |   |     |
| 52 | Fracture of orbital roof (disorder)                           | 1 | 0.2 |
| 53 |                                                               |   |     |
| 54 |                                                               |   |     |
| 55 |                                                               |   |     |
| 56 |                                                               |   |     |
| 57 |                                                               |   |     |
| 58 |                                                               |   |     |
| 59 |                                                               |   |     |
| 60 |                                                               |   |     |

|    |                                              |   |     |
|----|----------------------------------------------|---|-----|
| 1  |                                              |   |     |
| 2  |                                              |   |     |
| 3  | Fracture of pelvis (disorder)                | 1 | 0.2 |
| 4  |                                              |   |     |
| 5  | Fracture of pubis (disorder)                 | 1 | 0.2 |
| 6  |                                              |   |     |
| 7  | Fracture of skull (disorder)                 | 1 | 0.2 |
| 8  |                                              |   |     |
| 9  |                                              |   |     |
| 10 | Fracture of sternum (disorder)               | 1 | 0.2 |
| 11 |                                              |   |     |
| 12 | Fracture of thoracic spine (disorder)        | 1 | 0.2 |
| 13 |                                              |   |     |
| 14 | Fracture of upper jaw closed (disorder)      | 1 | 0.2 |
| 15 |                                              |   |     |
| 16 | Fracture of vertebral column (disorder)      | 1 | 0.2 |
| 17 |                                              |   |     |
| 18 | Hematoma (disorder)                          | 1 | 0.2 |
| 19 |                                              |   |     |
| 20 | Injury of facial nerve (disorder)            | 1 | 0.2 |
| 21 |                                              |   |     |
| 22 | Injury of kidney (disorder)                  | 1 | 0.2 |
| 23 |                                              |   |     |
| 24 | Injury of pancreas (disorder)                | 1 | 0.2 |
| 25 |                                              |   |     |
| 26 | Injury of shoulder region (disorder)         | 1 | 0.2 |
| 27 |                                              |   |     |
| 28 | Intervertebral disc prolapse (disorder)      | 1 | 0.2 |
| 29 |                                              |   |     |
| 30 | Intracranial hemorrhage (disorder)           | 1 | 0.2 |
| 31 |                                              |   |     |
| 32 | Laceration of eye region (disorder)          | 1 | 0.2 |
| 33 |                                              |   |     |
| 34 | Loss of consciousness (finding)              | 1 | 0.2 |
| 35 |                                              |   |     |
| 36 | Migraine (disorder)                          | 1 | 0.2 |
| 37 |                                              |   |     |
| 38 | Motor vehicle accident driver (finding)      | 1 | 0.2 |
| 39 |                                              |   |     |
| 40 | Multiple fractures (disorder)                | 1 | 0.2 |
| 41 |                                              |   |     |
| 42 | Muscle strain (disorder)                     | 1 | 0.2 |
| 43 |                                              |   |     |
| 44 | Neck sprain (disorder)                       | 1 | 0.2 |
| 45 |                                              |   |     |
| 46 | Open fracture of nasal bones (disorder)      | 1 | 0.2 |
| 47 |                                              |   |     |
| 48 | Open fracture of patella (disorder)          | 1 | 0.2 |
| 49 |                                              |   |     |
| 50 | Open fracture of tibia AND fibula (disorder) | 1 | 0.2 |
| 51 |                                              |   |     |
| 52 | Open wound of lower leg (disorder)           | 1 | 0.2 |
| 53 |                                              |   |     |
| 54 |                                              |   |     |
| 55 |                                              |   |     |
| 56 |                                              |   |     |
| 57 |                                              |   |     |
| 58 |                                              |   |     |
| 59 |                                              |   |     |
| 60 |                                              |   |     |



|    |                                                   |   |     |
|----|---------------------------------------------------|---|-----|
| 1  |                                                   |   |     |
| 2  |                                                   |   |     |
| 3  | Pins and needles (finding)                        | 1 | 0.2 |
| 4  |                                                   |   |     |
| 5  | Recurrent falls (finding)                         | 1 | 0.2 |
| 6  |                                                   |   |     |
| 7  | Shoulder pain (finding)                           | 1 | 0.2 |
| 8  |                                                   |   |     |
| 9  |                                                   |   |     |
| 10 | Sprain of wrist (disorder)                        | 1 | 0.2 |
| 11 |                                                   |   |     |
| 12 | Strain of neck muscle (disorder)                  | 1 | 0.2 |
| 13 |                                                   |   |     |
| 14 | Superficial injury of face (disorder)             | 1 | 0.2 |
| 15 |                                                   |   |     |
| 16 |                                                   |   |     |
| 17 | Superficial injury of head (disorder)             | 1 | 0.2 |
| 18 |                                                   |   |     |
| 19 | Syncope (disorder)                                | 1 | 0.2 |
| 20 |                                                   |   |     |
| 21 | Transient global amnesia (finding)                | 1 | 0.2 |
| 22 |                                                   |   |     |
| 23 |                                                   |   |     |
| 24 | Traumatic dislocation of clavicle (disorder)      | 1 | 0.2 |
| 25 |                                                   |   |     |
| 26 | Traumatic subdural hemorrhage (disorder)          | 1 | 0.2 |
| 27 |                                                   |   |     |
| 28 | Unexplained falls (finding)                       | 1 | 0.2 |
| 29 |                                                   |   |     |
| 30 | Victim of trauma with multiple injuries (finding) | 1 | 0.2 |
| 31 |                                                   |   |     |
| 32 |                                                   |   |     |
| 33 | Vomiting (disorder)                               | 1 | 0.2 |
| 34 |                                                   |   |     |
| 35 | Wound discharge (finding)                         | 1 | 0.2 |
| 36 |                                                   |   |     |
| 37 | <hr/>                                             |   |     |
| 38 |                                                   |   |     |
| 39 |                                                   |   |     |
| 40 |                                                   |   |     |
| 41 |                                                   |   |     |
| 42 |                                                   |   |     |
| 43 |                                                   |   |     |
| 44 |                                                   |   |     |
| 45 |                                                   |   |     |
| 46 |                                                   |   |     |
| 47 |                                                   |   |     |
| 48 |                                                   |   |     |
| 49 |                                                   |   |     |
| 50 |                                                   |   |     |
| 51 |                                                   |   |     |
| 52 |                                                   |   |     |
| 53 |                                                   |   |     |
| 54 |                                                   |   |     |
| 55 |                                                   |   |     |
| 56 |                                                   |   |     |
| 57 |                                                   |   |     |
| 58 |                                                   |   |     |
| 59 |                                                   |   |     |
| 60 |                                                   |   |     |

**Table S4.** Significant differences (p<.05) between people with and without recorded mTBI diagnosis in Emergency Department (ED) records and/or ED discharge codes indicative of mild traumatic brain injury (mTBI), among confirmed mTBI cases (N=351).

| <b>Confirmed mTBI cases (N=351)</b> |                                                      |                                                  |                               |                                                                    |                                                                |                               |
|-------------------------------------|------------------------------------------------------|--------------------------------------------------|-------------------------------|--------------------------------------------------------------------|----------------------------------------------------------------|-------------------------------|
|                                     | <b>Cases with no recorded mTBI diagnosis (N=269)</b> | <b>Cases with recorded mTBI diagnosis (N=81)</b> | <b>Statistical comparison</b> | <b>Cases with no ED discharge codes indicative of mTBI (N=314)</b> | <b>Cases with ED discharge codes indicative of mTBI (N=37)</b> | <b>Statistical comparison</b> |
|                                     | <b>N (%)</b>                                         | <b>N (%)</b>                                     | <b>p value§</b>               | <b>N (%)</b>                                                       | <b>N (%)</b>                                                   | <b>p value§</b>               |
| Non-traffic-related injury          | 186 (69.1)                                           | 66 (81.5)                                        | 0.03                          | 93 (30.6)                                                          | 3 (8.1)                                                        | 0.004                         |
| Discharge destination               |                                                      |                                                  | 0.0005                        |                                                                    |                                                                | 0.01                          |
| Discharged home                     | 104 (38.7)                                           | 29 (35.8)                                        |                               | 119 (37.9)                                                         | 14 (37.8)                                                      |                               |

|                                              |            |           |         |            |           |         |
|----------------------------------------------|------------|-----------|---------|------------|-----------|---------|
| Admitted to ED                               | 104 (38.7) | 17 (21)   |         | 115 (36.6) | 6 (16.2)  |         |
| Admitted to ward                             | 61 (22.7)  | 35 (43.2) |         | 80 (25.5)  | 17 (46)   |         |
| Intracranial injuries on head CT             | 4 (2)      | 26 (42.6) | <0.0001 | 16 (6.7)   | 14 (50)   | <0.0001 |
| Headache                                     | 103 (38.3) | 46 (56.8) | 0.009   | 127 (40.5) | 22 (59.5) | 0.03    |
| Concentration problems                       | 0 (0)      | 4 (4.9)   | 0.001   | 2 (0.6)    | 2 (5.4)   | 0.01    |
| Follow-up recommendations                    | 83 (30.9)  | 44 (54.3) | 0.0003  | 106 (33.8) | 22 (59.5) | 0.002   |
| PTA measured                                 | 125 (46.5) | 56 (69.1) | 0.0003  | -          | -         | -       |
| Recorded mTBI diagnosis in the<br>ED records | -          | -         | -       | 85 (27.1)  | 16 (43.2) | 0.04    |

§  $\chi^2$ , z-test, t-test.

**Table S5.** Significant differences ( $p < .05$ ) between people tested for Post-traumatic Amnesia (PTA) versus those not tested, among confirmed mild traumatic brain injury (mTBI) (N=351) and indeterminate cases (N=180).

|                                | Confirmed mTBI cases (N=351)                       |                                                |                           | Indeterminate mTBI cases (N=180)                       |                                                   |                           |
|--------------------------------|----------------------------------------------------|------------------------------------------------|---------------------------|--------------------------------------------------------|---------------------------------------------------|---------------------------|
|                                | Confirmed<br>mTBI not<br>tested for PTA<br>(N=169) | Confirmed<br>mTBI tested<br>for PTA<br>(N=182) | Statistical<br>comparison | Indeterminate<br>mTBI not tested<br>for PTA<br>(N=134) | Indeterminate<br>mTBI tested for<br>PTA<br>(N=46) | Statistical<br>comparison |
|                                | N (%)                                              | N (%)                                          | p value§                  | N (%)                                                  | N (%)                                             | p value§                  |
| Transported to ED by ambulance | 108 (63.9)                                         | 142 (78)                                       | 0.004                     | 30 (22.4)                                              | 26 (56.5)                                         | <0.0001                   |
| Traffic-related injury         | 32 (18.9)                                          | 67 (36.8)                                      | 0.0002                    | 23 (17.2)                                              | 21 (45.7)                                         | 0.0001                    |
| Discharge destination          |                                                    |                                                | <0.0001                   |                                                        |                                                   | <0.0001                   |
| Discharged home                | 98 (58)                                            | 35 (19.2)                                      |                           | 106 (79.1)                                             | 21 (45.7)                                         |                           |
| Admitted to ED                 | 43 (25.4)                                          | 78 (42.9)                                      |                           | 21 (15.7)                                              | 15 (32.6)                                         |                           |
| Admitted to ward               | 28 (16.6)                                          | 69 (37.9)                                      |                           | 7 (5.2)                                                | 10 (21.7)                                         |                           |

|    |                                  |            |            |         |   |   |   |
|----|----------------------------------|------------|------------|---------|---|---|---|
| 1  |                                  |            |            |         |   |   |   |
| 2  |                                  |            |            |         |   |   |   |
| 3  | LOC reported                     | 49 (34.8)  | 85 (53.1)  | 0.005   | - | - | - |
| 4  |                                  |            |            |         |   |   |   |
| 5  | Amnesia reported                 | 85 (71.4)  | 140 (91.5) | <0.0001 | - | - | - |
| 6  |                                  |            |            |         |   |   |   |
| 7  | Brain CT performed               | 116 (68.6) | 150 (82.4) | 0.003   | - | - | - |
| 8  |                                  |            |            |         |   |   |   |
| 9  | Intracranial injuries on head CT | 2 (1.7)    | 28 (18.6)  | <0.0001 | - | - | - |
| 10 |                                  |            |            |         |   |   |   |

11  
12 §  $\chi^2$ , z-test, t-test  
13  
14  
15  
16  
17  
18  
19  
20  
21  
22  
23  
24  
25  
26  
27  
28  
29  
30  
31  
32  
33  
34  
35  
36  
37  
38  
39  
40  
41  
42  
43  
44  
45  
46

For peer review only

**Figure S1.** Percent of screened ED presentations aged 18-65 years with confirmed or indeterminate mTBI (total 30 479 screened, 351 confirmed mTBI (1.15%), 180 indeterminate mTBI (0.6%)).



iew only

STROBE Statement—checklist of items that should be included in reports of observational studies  
**YOU MUST NOTE THE PAGE NUMBER WHERE EACH ITEM IS REPORTED INSIDE THE BRACKETS [ ]. IF NOT APPLICABLE WRITE N/A**

|                           | Item No | Recommendation                                                                                                                                                                                                                                                                                                                                                                                                                                                                                                                                                                                                                                                                                                             |
|---------------------------|---------|----------------------------------------------------------------------------------------------------------------------------------------------------------------------------------------------------------------------------------------------------------------------------------------------------------------------------------------------------------------------------------------------------------------------------------------------------------------------------------------------------------------------------------------------------------------------------------------------------------------------------------------------------------------------------------------------------------------------------|
| <b>Title and abstract</b> | 1       | (a) Indicate the study's design with a commonly used term in the title or the abstract [ 1, 3 ]<br>(b) Provide in the abstract an informative and balanced summary of what was done and what was found [ 3 ]                                                                                                                                                                                                                                                                                                                                                                                                                                                                                                               |
| <b>Introduction</b>       |         |                                                                                                                                                                                                                                                                                                                                                                                                                                                                                                                                                                                                                                                                                                                            |
| Background/rationale      | 2       | Explain the scientific background and rationale for the investigation being reported [ 5-7 ]                                                                                                                                                                                                                                                                                                                                                                                                                                                                                                                                                                                                                               |
| Objectives                | 3       | State specific objectives, including any prespecified hypotheses [ 7 ]                                                                                                                                                                                                                                                                                                                                                                                                                                                                                                                                                                                                                                                     |
| <b>Methods</b>            |         |                                                                                                                                                                                                                                                                                                                                                                                                                                                                                                                                                                                                                                                                                                                            |
| Study design              | 4       | Present key elements of study design early in the paper [ 7 ]                                                                                                                                                                                                                                                                                                                                                                                                                                                                                                                                                                                                                                                              |
| Setting                   | 5       | Describe the setting, locations, and relevant dates, including periods of recruitment, exposure, follow-up, and data collection [ 7 ]                                                                                                                                                                                                                                                                                                                                                                                                                                                                                                                                                                                      |
| Participants              | 6       | (a) <i>Cohort study</i> —Give the eligibility criteria, and the sources and methods of selection of participants. Describe methods of follow-up [ 7 ]<br><i>Case-control study</i> —Give the eligibility criteria, and the sources and methods of case ascertainment and control selection. Give the rationale for the choice of cases and controls [ ]<br><i>Cross-sectional study</i> —Give the eligibility criteria, and the sources and methods of selection of participants [ ]<br>(b) <i>Cohort study</i> —For matched studies, give matching criteria and number of exposed and unexposed [ N/A ]<br><i>Case-control study</i> —For matched studies, give matching criteria and the number of controls per case [ ] |
| Variables                 | 7       | Clearly define all outcomes, exposures, predictors, potential confounders, and effect modifiers. Give diagnostic criteria, if applicable [ 8-9 ]                                                                                                                                                                                                                                                                                                                                                                                                                                                                                                                                                                           |
| Data sources/ measurement | 8*      | For each variable of interest, give sources of data and details of methods of assessment (measurement). Describe comparability of assessment methods if there is more than one group [ 8-9 ]                                                                                                                                                                                                                                                                                                                                                                                                                                                                                                                               |
| Bias                      | 9       | Describe any efforts to address potential sources of bias [ 16 ]                                                                                                                                                                                                                                                                                                                                                                                                                                                                                                                                                                                                                                                           |
| Study size                | 10      | Explain how the study size was arrived at [N/A ]                                                                                                                                                                                                                                                                                                                                                                                                                                                                                                                                                                                                                                                                           |
| Quantitative variables    | 11      | Explain how quantitative variables were handled in the analyses. If applicable, describe which groupings were chosen and why [ N/A ]                                                                                                                                                                                                                                                                                                                                                                                                                                                                                                                                                                                       |
| Statistical methods       | 12      | (a) Describe all statistical methods, including those used to control for confounding [ N/A ]<br>(b) Describe any methods used to examine subgroups and interactions [N/A ]<br>(c) Explain how missing data were addressed [ N/A ]<br>(d) <i>Cohort study</i> —If applicable, explain how loss to follow-up was addressed [N/A ]<br><i>Case-control study</i> —If applicable, explain how matching of cases and controls was addressed [ ]<br><i>Cross-sectional study</i> —If applicable, describe analytical methods taking account of sampling strategy [ ]<br>(e) Describe any sensitivity analyses [ N/A ]                                                                                                            |

Continued on next page

1  
2  
3  
4  
5  
6  
7  
8  
9  
10  
11  
12  
13  
14  
15  
16  
17  
18  
19  
20  
21  
22  
23  
24  
25  
26  
27  
28  
29  
30  
31  
32  
33  
34  
35  
36  
37  
38  
39  
40  
41  
42  
43  
44  
45  
46  
47  
48  
49  
50  
51  
52  
53  
54  
55  
56  
57  
58  
59  
60

| <b>Results</b>           |     |                                                                                                                                                                                                                                                                                                                                                                                                                                                                                  |
|--------------------------|-----|----------------------------------------------------------------------------------------------------------------------------------------------------------------------------------------------------------------------------------------------------------------------------------------------------------------------------------------------------------------------------------------------------------------------------------------------------------------------------------|
| Participants             | 13* | (a) Report numbers of individuals at each stage of study—eg numbers potentially eligible, examined for eligibility, confirmed eligible, included in the study, completing follow-up, and analysed [ 9 ]<br>(b) Give reasons for non-participation at each stage [ 9 ]<br>(c) Consider use of a flow diagram [ 9; Figure 1 ]                                                                                                                                                      |
| Descriptive data         | 14* | (a) Give characteristics of study participants (eg demographic, clinical, social) and information on exposures and potential confounders [ 9-11 ; Table 1 ]<br>(b) Indicate number of participants with missing data for each variable of interest [ Table 1 ]<br>(c) <i>Cohort study</i> —Summarise follow-up time (eg, average and total amount) [ N/A ]                                                                                                                       |
| Outcome data             | 15* | <i>Cohort study</i> —Report numbers of outcome events or summary measures over time [ 9-11 ]<br><i>Case-control study</i> —Report numbers in each exposure category, or summary measures of exposure [ ]<br><i>Cross-sectional study</i> —Report numbers of outcome events or summary measures [ ]                                                                                                                                                                               |
| Main results             | 16  | (a) Give unadjusted estimates and, if applicable, confounder-adjusted estimates and their precision (eg, 95% confidence interval). Make clear which confounders were adjusted for and why they were included [proportions are presented in pg 7 and in Table 1 ]<br>(b) Report category boundaries when continuous variables were categorized [ N/A ]<br>(c) If relevant, consider translating estimates of relative risk into absolute risk for a meaningful time period [N/A ] |
| Other analyses           | 17  | Report other analyses done—eg analyses of subgroups and interactions, and sensitivity analyses [ 11-12]                                                                                                                                                                                                                                                                                                                                                                          |
| <b>Discussion</b>        |     |                                                                                                                                                                                                                                                                                                                                                                                                                                                                                  |
| Key results              | 18  | Summarise key results with reference to study objectives [ 12 ]                                                                                                                                                                                                                                                                                                                                                                                                                  |
| Limitations              | 19  | Discuss limitations of the study, taking into account sources of potential bias or imprecision. Discuss both direction and magnitude of any potential bias [ 12, 16-17 ]                                                                                                                                                                                                                                                                                                         |
| Interpretation           | 20  | Give a cautious overall interpretation of results considering objectives, limitations, multiplicity of analyses, results from similar studies, and other relevant evidence [ 12-16 ]                                                                                                                                                                                                                                                                                             |
| Generalisability         | 21  | Discuss the generalisability (external validity) of the study results [ 16]                                                                                                                                                                                                                                                                                                                                                                                                      |
| <b>Other information</b> |     |                                                                                                                                                                                                                                                                                                                                                                                                                                                                                  |
| Funding                  | 22  | Give the source of funding and the role of the funders for the present study and, if applicable, for the original study on which the present article is based [ 18 ]                                                                                                                                                                                                                                                                                                             |

\*Give information separately for cases and controls in case-control studies and, if applicable, for exposed and unexposed groups in cohort and cross-sectional studies.
